# Supplementary material
Source: MDPI journal article supplement (https://www.mdpi.com/1424-8247/14/6/584)
Supplement: s1 [file s1]

# Supplementary Material

## Discovery of selective inhibitor leads by targeting an allosteric site in Insulin-Regulated Aminopeptidase

Ioannis Temponeras<sup>1</sup>, Lykourgos Chiniadis<sup>1</sup>, Athanasios Papakyriakou<sup>\*1</sup> and Efstratios Stratikos<sup>\*,1,2</sup>

<sup>1</sup> National Centre for Scientific Research Demokritos, Agia Paraskevi, Greece

<sup>2</sup> Department of Chemistry, National and Kapodistrian University of Athens, Greece

<sup>\*</sup> Correspondence: thpap@bio.demokritos.gr or estratikos@chem.uoa.gr

### Table of Contents

|                                 |    |
|---------------------------------|----|
| <a href="#">Figure S1</a> ..... | 2  |
| <a href="#">Table S1</a> .....  | 3  |
| <a href="#">Table S2</a> .....  | 8  |
| <a href="#">Table S3</a> .....  | 13 |
| <a href="#">Table S4</a> .....  | 20 |
| <a href="#">Table S5</a> .....  | 27 |
| <a href="#">Table S6</a> .....  | 34 |
| <a href="#">Table S7</a> .....  | 41 |
| <a href="#">Figure S2</a> ..... | 43 |
| <a href="#">Figure S3</a> ..... | 44 |
| <a href="#">Figure S4</a> ..... | 45 |
| <a href="#">Table S8</a> .....  | 47 |
| <a href="#">Figure S5</a> ..... | 52 |
| <a href="#">Figure S6</a> ..... | 53 |
| <a href="#">Figure S7</a> ..... | 54 |
| <a href="#">Figure S8</a> ..... | 55 |

| <div> <div>Rep.</div> <div>2D</div> <div>3D</div> <div>React.</div> <div>Standard</div> <div>Purch.</div> <div>In-Stock</div> <div>pH</div> <div>Ref Mid</div> <div>Charge</div> <div>-2 -1 0 +1 +2</div> <div></div> <div></div> </div> |     |         |         |         |         |         |         |         |         |         |         |         |                                |
|------------------------------------------------------------------------------------------------------------------------------------------------------------------------------------------------------------------------------------------|-----|---------|---------|---------|---------|---------|---------|---------|---------|---------|---------|---------|--------------------------------|
| Molecular Weight (up to, Daltons)                                                                                                                                                                                                        |     |         |         |         |         |         |         |         |         |         |         |         |                                |
| LogP (up to)                                                                                                                                                                                                                             |     | 200     | 250     | 300     | 325     | 350     | 375     | 400     | 425     | 450     | 500     | >500    | Totals, by LogP                |
|                                                                                                                                                                                                                                          | -1  | 7,719   | 6,132   | 7,451   | 4,008   | 3,677   | 2,632   | 1,651   | 1,207   | 1,054   | 1,422   | 2,841   | 39,794                         |
|                                                                                                                                                                                                                                          | 0   | 29,273  | 21,724  | 33,586  | 21,166  | 21,547  | 13,000  | 6,809   | 4,249   | 2,871   | 2,853   | 2,805   | 159,883                        |
|                                                                                                                                                                                                                                          | 1   | 77,696  | 88,965  | 157,807 | 112,036 | 115,193 | 66,828  | 33,838  | 20,413  | 13,093  | 12,868  | 6,156   | 704,893                        |
|                                                                                                                                                                                                                                          | 2   | 100,929 | 187,772 | 396,402 | 319,413 | 231,293 | 231,825 | 126,158 | 82,640  | 58,856  | 52,909  | 16,812  | 1,805,009                      |
|                                                                                                                                                                                                                                          | 2.5 | 35,177  | 105,806 | 280,909 | 250,419 | 326,514 | 206,142 | 128,713 | 95,823  | 71,193  | 65,420  | 19,493  | 1,585,609                      |
|                                                                                                                                                                                                                                          | 3   | 20,249  | 84,355  | 262,517 | 248,186 | 377,939 | 282,752 | 181,246 | 141,630 | 111,534 | 110,991 | 35,445  | 1,856,844                      |
|                                                                                                                                                                                                                                          | 3.5 | 8,732   | 52,427  | 198,754 | 218,204 | 325,910 | 281,982 | 215,073 | 183,732 | 151,939 | 160,634 | 61,553  | 1,858,940                      |
|                                                                                                                                                                                                                                          | 4   | 2,609   | 24,056  | 117,310 | 139,596 | 234,162 | 240,875 | 255,592 | 216,924 | 181,436 | 208,383 | 96,290  | 1,717,233                      |
|                                                                                                                                                                                                                                          | 4.5 | 542     | 8,213   | 54,255  | 80,431  | 139,126 | 175,095 | 197,418 | 206,406 | 185,318 | 231,640 | 110,254 | 1,388,698                      |
| Totals, by Weight                                                                                                                                                                                                                        | 5   | 93      | 2,271   | 20,547  | 35,136  | 68,741  | 103,831 | 120,103 | 150,108 | 158,689 | 228,537 | 170,303 | 1,058,359                      |
|                                                                                                                                                                                                                                          | >5  | 27      | 750     | 8,702   | 18,028  | 43,936  | 84,740  | 119,766 | 180,013 | 222,032 | 478,712 | 848,071 | 2,004,777                      |
|                                                                                                                                                                                                                                          |     |         |         |         |         |         |         |         |         |         |         |         | 14M Protomers<br>8.2K Tranches |

| <div> <div>Rep.</div> <div>2D</div> <div>3D</div> <div>React.</div> <div>Anodyne</div> <div>Purch.</div> <div>In-Stock</div> <div>pH</div> <div>Ref</div> <div>Charge</div> <div>-2 -1 0 +1 +2</div> <div></div> <div></div> </div> |     |        |         |         |         |         |         |         |         |         |         |         |                                |
|-------------------------------------------------------------------------------------------------------------------------------------------------------------------------------------------------------------------------------------|-----|--------|---------|---------|---------|---------|---------|---------|---------|---------|---------|---------|--------------------------------|
| Molecular Weight (up to, Daltons)                                                                                                                                                                                                   |     |        |         |         |         |         |         |         |         |         |         |         |                                |
| LogP (up to)                                                                                                                                                                                                                        |     | 200    | 250     | 300     | 325     | 350     | 375     | 400     | 425     | 450     | 500     | >500    | Totals, by LogP                |
|                                                                                                                                                                                                                                     | -1  | 5,811  | 4,565   | 5,585   | 2,895   | 2,687   | 1,947   | 1,196   | 817     | 610     | 872     | 1,560   | 15,732                         |
|                                                                                                                                                                                                                                     | 0   | 21,311 | 15,619  | 23,920  | 15,050  | 15,757  | 8,940   | 5,179   | 3,235   | 2,002   | 1,974   | 1,792   | 70,346                         |
|                                                                                                                                                                                                                                     | 1   | 58,640 | 61,897  | 110,983 | 79,182  | 82,677  | 49,658  | 29,497  | 15,351  | 9,938   | 8,825   | 4,142   | 334,739                        |
|                                                                                                                                                                                                                                     | 2   | 72,651 | 131,269 | 280,168 | 225,896 | 165,025 | 169,663 | 93,472  | 61,725  | 43,919  | 39,501  | 11,325  | 802,358                        |
|                                                                                                                                                                                                                                     | 2.5 | 25,171 | 75,496  | 199,503 | 178,925 | 235,035 | 149,771 | 94,225  | 70,224  | 51,985  | 47,917  | 12,813  | 688,959                        |
|                                                                                                                                                                                                                                     | 3   | 15,804 | 60,977  | 187,239 | 178,061 | 274,897 | 204,830 | 133,169 | 103,335 | 81,027  | 60,171  | 23,101  | 701,174                        |
|                                                                                                                                                                                                                                     | 3.5 | 6,787  | 38,433  | 141,659 | 158,058 | 241,061 | 204,940 | 157,607 | 133,892 | 110,285 | 115,848 | 40,814  | 0                              |
|                                                                                                                                                                                                                                     | 4   | 1,960  | 17,971  | 65,298  | 101,696 | 173,946 | 175,929 | 186,322 | 158,014 | 130,211 | 147,318 | 83,844  | 0                              |
|                                                                                                                                                                                                                                     | 4.5 | 398    | 5,688   | 38,665  | 58,416  | 103,295 | 129,648 | 143,846 | 149,535 | 131,741 | 160,887 | 80,267  | 0                              |
| Totals, by Weight                                                                                                                                                                                                                   | 5   | 54     | 1,385   | 14,285  | 25,796  | 51,378  | 77,184  | 87,985  | 108,443 | 113,047 | 157,621 | 111,630 | 0                              |
|                                                                                                                                                                                                                                     | >5  | 8      | 404     | 4,837   | 11,561  | 38,356  | 60,157  | 65,261  | 125,113 | 151,923 | 309,900 | 489,346 | 0                              |
|                                                                                                                                                                                                                                     |     |        |         |         |         |         |         |         |         |         |         |         | 2.6M Protomers<br>240 Tranches |

**Figure S1.** Chemical space of ZINC15 in tranches of 3D protomers according to size (MW) and hydrophobicity (LogP), for a total of 14 million readily available compounds (in-stock with standard reactivity, upper) and the lead-like subset selected (lower). Screenshots were taken in March 2019.

**Table S1.** The top-ranked selection of compounds based on their estimated binding affinity for IRAP (given as VINA score in kcal/mol). The corresponding estimated affinity for ERAP1 and their difference to IRAP are also given as  $\Delta\text{Delta} = \Delta(\Delta G_{\text{bind}}^{\text{(IRAP)}}) - \Delta G_{\text{bind}}^{\text{(ERAP1)}}$ .

| #  | ZINC ID          | VINA score (kcal/mol) |       |                      |
|----|------------------|-----------------------|-------|----------------------|
|    |                  | IRAP                  | ERAP1 | $\Delta\text{Delta}$ |
| 1  | ZINC000257220067 | -11.7                 | -8.9  | -2.8                 |
| 2  | ZINC000034895992 | -11.6                 | -9.6  | -2.0                 |
| 3  | ZINC000041548359 | -11.6                 | -9.1  | -2.5                 |
| 4  | ZINC000012550491 | -11.6                 | -8.9  | -2.7                 |
| 5  | ZINC000003617904 | -11.6                 | -8.8  | -2.8                 |
| 6  | ZINC000006117573 | -11.5                 | -10.9 | -0.6                 |
| 7  | ZINC000022241454 | -11.5                 | -10.2 | -1.3                 |
| 8  | ZINC000000489138 | -11.5                 | -9.8  | -1.7                 |
| 9  | ZINC000014689114 | -11.5                 | -9.8  | -1.7                 |
| 10 | ZINC000255187536 | -11.5                 | -9.5  | -2.0                 |
| 11 | ZINC000100191495 | -11.5                 | -9.4  | -2.1                 |
| 12 | ZINC000072807915 | -11.5                 | -9.3  | -2.2                 |
| 13 | ZINC000100193430 | -11.5                 | -9.3  | -2.2                 |
| 14 | ZINC000003947438 | -11.4                 | -9.8  | -1.6                 |
| 15 | ZINC000004722089 | -11.4                 | -9.8  | -1.6                 |
| 16 | ZINC000001810957 | -11.4                 | -9.6  | -1.8                 |
| 17 | ZINC000016543876 | -11.4                 | -9.3  | -2.1                 |
| 18 | ZINC000068269627 | -11.4                 | -9.3  | -2.1                 |
| 19 | ZINC000009318779 | -11.4                 | -9.2  | -2.2                 |
| 20 | ZINC000257310083 | -11.4                 | -9.0  | -2.4                 |
| 21 | ZINC000067263105 | -11.3                 | -10.1 | -1.2                 |
| 22 | ZINC000018053795 | -11.3                 | -9.7  | -1.6                 |
| 23 | ZINC000085879141 | -11.3                 | -9.6  | -1.7                 |
| 24 | ZINC000045070892 | -11.3                 | -9.4  | -1.9                 |
| 25 | ZINC000084686490 | -11.3                 | -9.3  | -2.0                 |
| 26 | ZINC000008848147 | -11.3                 | -9.2  | -2.1                 |
| 27 | ZINC000035398834 | -11.3                 | -9.2  | -2.1                 |
| 28 | ZINC000225746732 | -11.3                 | -9.2  | -2.1                 |
| 29 | ZINC000062639858 | -11.3                 | -9.1  | -2.2                 |
| 30 | ZINC000000187795 | -11.3                 | -9.0  | -2.3                 |
| 31 | ZINC000012557331 | -11.3                 | -8.9  | -2.4                 |
| 32 | ZINC000253433259 | -11.3                 | -7.8  | -3.5                 |
| 33 | ZINC000012323933 | -11.2                 | -10.1 | -1.1                 |
| 34 | ZINC000007030710 | -11.2                 | -9.7  | -1.5                 |
| 35 | ZINC000257206610 | -11.2                 | -9.7  | -1.5                 |
| 36 | ZINC000067643674 | -11.2                 | -9.6  | -1.6                 |
| 37 | ZINC000014689108 | -11.2                 | -9.5  | -1.7                 |
| 38 | ZINC000012557330 | -11.2                 | -9.4  | -1.8                 |
| 39 | ZINC000013278475 | -11.2                 | -9.4  | -1.8                 |
| 40 | ZINC000044908085 | -11.2                 | -9.4  | -1.8                 |
| 41 | ZINC000048249797 | -11.2                 | -9.4  | -1.8                 |
| 42 | ZINC000061067795 | -11.2                 | -9.4  | -1.8                 |

| #         | ZINC ID                 | VINA score (kcal/mol) |              |              |
|-----------|-------------------------|-----------------------|--------------|--------------|
|           |                         | IRAP                  | ERAP1        | <i>Delta</i> |
| 43        | ZINC000009338249        | -11.2                 | -9.3         | -1.9         |
| 44        | ZINC000028790813        | -11.2                 | -9.3         | -1.9         |
| 45        | ZINC000089857747        | -11.2                 | -9.2         | -2.0         |
| 46        | ZINC000225752266        | -11.2                 | -9.1         | -2.1         |
| 47        | ZINC000001431797        | -11.2                 | -9.0         | -2.2         |
| 48        | ZINC000095951555        | -11.2                 | -9.0         | -2.2         |
| 49        | ZINC000097413355        | -11.2                 | -8.9         | -2.3         |
| 50        | ZINC000001620500        | -11.2                 | -8.6         | -2.6         |
| 51        | ZINC000040386288        | -11.2                 | -8.6         | -2.6         |
| 52        | ZINC000077522487        | -11.2                 | -8.5         | -2.7         |
| 53        | ZINC000023995834        | -11.2                 | -8.4         | -2.8         |
| 54        | ZINC000040473994        | -11.2                 | -8.4         | -2.8         |
| 55        | ZINC000585093224        | -11.2                 | -8.4         | -2.8         |
| 56        | ZINC000239762559        | -11.2                 | -7.8         | -3.4         |
| 57        | ZINC000000136922        | -11.1                 | -10.2        | -0.9         |
| <b>58</b> | <b>ZINC000057563200</b> | <b>-11.1</b>          | <b>-10.0</b> | <b>-1.1</b>  |
| 59        | ZINC000044874685        | -11.1                 | -9.9         | -1.2         |
| 60        | ZINC000192753414        | -11.1                 | -9.9         | -1.2         |
| 61        | ZINC000069775761        | -11.1                 | -9.8         | -1.3         |
| 62        | ZINC000004003439        | -11.1                 | -9.7         | -1.4         |
| 63        | ZINC000030875068        | -11.1                 | -9.7         | -1.4         |
| 64        | ZINC000072437791        | -11.1                 | -9.7         | -1.4         |
| 65        | ZINC000095393415        | -11.1                 | -9.6         | -1.5         |
| 66        | ZINC000014791001        | -11.1                 | -9.5         | -1.6         |
| 67        | ZINC000268943077        | -11.1                 | -9.5         | -1.6         |
| 68        | ZINC000000082526        | -11.1                 | -9.4         | -1.7         |
| 69        | ZINC000007030648        | -11.1                 | -9.4         | -1.7         |
| 70        | ZINC000072300732        | -11.1                 | -9.4         | -1.7         |
| 71        | ZINC000003617861        | -11.1                 | -9.2         | -1.9         |
| 72        | ZINC000057771728        | -11.1                 | -9.2         | -1.9         |
| 73        | ZINC000077503523        | -11.1                 | -9.2         | -1.9         |
| 74        | ZINC000078914774        | -11.1                 | -9.2         | -1.9         |
| 75        | ZINC000009318781        | -11.1                 | -9.1         | -2.0         |
| 76        | ZINC000019327176        | -11.1                 | -9.0         | -2.1         |
| 77        | ZINC000084563579        | -11.1                 | -9.0         | -2.1         |
| 78        | ZINC000013562617        | -11.1                 | -8.9         | -2.2         |
| 79        | ZINC000013691850        | -11.1                 | -8.9         | -2.2         |
| 80        | ZINC000072290626        | -11.1                 | -8.8         | -2.3         |
| 81        | ZINC000194368147        | -11.1                 | -8.7         | -2.4         |
| 82        | ZINC000299785131        | -11.1                 | -8.6         | -2.5         |
| <b>83</b> | <b>ZINC000095415912</b> | <b>-11.1</b>          | <b>-8.5</b>  | <b>-2.6</b>  |
| 84        | ZINC000000065653        | -11.1                 | -8.4         | -2.7         |
| 85        | ZINC000050857093        | -11.1                 | -8.2         | -2.9         |
| 86        | ZINC000100756934        | -11.1                 | -8.1         | -3.0         |
| <b>87</b> | <b>ZINC000051467674</b> | <b>-11.1</b>          | <b>-8.0</b>  | <b>-3.1</b>  |

| #          | ZINC ID                 | VINA score (kcal/mol) |             |              |
|------------|-------------------------|-----------------------|-------------|--------------|
|            |                         | IRAP                  | ERAP1       | <i>Delta</i> |
| 88         | ZINC000004807849        | -11.0                 | -10.4       | -0.6         |
| 89         | ZINC000018177963        | -11.0                 | -10.4       | -0.6         |
| 90         | ZINC000005426253        | -11.0                 | -10.3       | -0.7         |
| 91         | ZINC000017888288        | -11.0                 | -10.3       | -0.7         |
| 92         | ZINC000052955795        | -11.0                 | -10.2       | -0.8         |
| 93         | ZINC000095469884        | -11.0                 | -10.2       | -0.8         |
| 94         | ZINC000012323932        | -11.0                 | -10.0       | -1.0         |
| 95         | ZINC000230113696        | -11.0                 | -9.8        | -1.2         |
| 96         | ZINC000005893172        | -11.0                 | -9.7        | -1.3         |
| <b>97</b>  | <b>ZINC000010256259</b> | <b>-11.0</b>          | <b>-9.7</b> | <b>-1.3</b>  |
| 98         | ZINC000065167646        | -11.0                 | -9.7        | -1.3         |
| 99         | ZINC000072896858        | -11.0                 | -9.7        | -1.3         |
| 100        | ZINC000136345745        | -11.0                 | -9.7        | -1.3         |
| 101        | ZINC000004100408        | -11.0                 | -9.6        | -1.4         |
| 102        | ZINC000013973188        | -11.0                 | -9.6        | -1.4         |
| 103        | ZINC000016228943        | -11.0                 | -9.6        | -1.4         |
| 104        | ZINC000065925006        | -11.0                 | -9.6        | -1.4         |
| 105        | ZINC000072896859        | -11.0                 | -9.6        | -1.4         |
| 106        | ZINC000029134571        | -11.0                 | -9.5        | -1.5         |
| 107        | ZINC000035671101        | -11.0                 | -9.5        | -1.5         |
| 108        | ZINC000104346290        | -11.0                 | -9.5        | -1.5         |
| 109        | ZINC000008771448        | -11.0                 | -9.4        | -1.6         |
| 110        | ZINC000008776545        | -11.0                 | -9.4        | -1.6         |
| 111        | ZINC000021835963        | -11.0                 | -9.4        | -1.6         |
| 112        | ZINC000178511392        | -11.0                 | -9.4        | -1.6         |
| 113        | ZINC000096122792        | -11.0                 | -9.3        | -1.7         |
| 114        | ZINC000003313076        | -11.0                 | -9.2        | -1.8         |
| 115        | ZINC000095387190        | -11.0                 | -9.2        | -1.8         |
| 116        | ZINC000100193536        | -11.0                 | -9.2        | -1.8         |
| <b>117</b> | <b>ZINC000244816835</b> | <b>-11.0</b>          | <b>-9.2</b> | <b>-1.8</b>  |
| 118        | ZINC000072290711        | -11.0                 | -9.1        | -1.9         |
| 119        | ZINC000000088011        | -11.0                 | -9.0        | -2.0         |
| 120        | ZINC000006086854        | -11.0                 | -9.0        | -2.0         |
| 121        | ZINC000018181694        | -11.0                 | -9.0        | -2.0         |
| 122        | ZINC000019973960        | -11.0                 | -9.0        | -2.0         |
| 123        | ZINC000257211885        | -11.0                 | -9.0        | -2.0         |
| 124        | ZINC000058202763        | -11.0                 | -8.9        | -2.1         |
| 125        | ZINC000095447759        | -11.0                 | -8.9        | -2.1         |
| <b>126</b> | <b>ZINC000223692657</b> | <b>-11.0</b>          | <b>-8.9</b> | <b>-2.1</b>  |
| 127        | ZINC000089827813        | -11.0                 | -8.8        | -2.2         |
| 128        | ZINC000004722011        | -11.0                 | -8.6        | -2.4         |
| 129        | ZINC000019796838        | -11.0                 | -8.6        | -2.4         |
| 130        | ZINC000257257831        | -11.0                 | -8.6        | -2.4         |
| 131        | ZINC000096238948        | -11.0                 | -8.5        | -2.5         |
| 132        | ZINC000171342968        | -11.0                 | -8.5        | -2.5         |

| #          | ZINC ID                 | VINA score (kcal/mol) |             |              |
|------------|-------------------------|-----------------------|-------------|--------------|
|            |                         | IRAP                  | ERAP1       | <i>Delta</i> |
| 133        | ZINC000178206155        | -11.0                 | -8.5        | -2.5         |
| 134        | ZINC000000439839        | -11.0                 | -8.4        | -2.6         |
| 135        | ZINC000096837115        | -10.9                 | -10.7       | -0.2         |
| 136        | ZINC000002465083        | -10.9                 | -10.6       | -0.3         |
| 137        | ZINC000006117574        | -10.9                 | -10.6       | -0.3         |
| 138        | ZINC000575617533        | -10.9                 | -10.4       | -0.5         |
| 139        | ZINC000003852421        | -10.9                 | -9.9        | -1.0         |
| 140        | ZINC000057511709        | -10.9                 | -9.9        | -1.0         |
| 141        | ZINC000072290753        | -10.9                 | -9.9        | -1.0         |
| 142        | ZINC000003875380        | -10.9                 | -9.8        | -1.1         |
| 143        | ZINC000013691849        | -10.9                 | -9.8        | -1.1         |
| 144        | ZINC000019973951        | -10.9                 | -9.8        | -1.1         |
| 145        | ZINC000072277544        | -10.9                 | -9.8        | -1.1         |
| 146        | ZINC000022549345        | -10.9                 | -9.7        | -1.2         |
| 147        | ZINC000034407910        | -10.9                 | -9.7        | -1.2         |
| 148        | ZINC000299793701        | -10.9                 | -9.7        | -1.2         |
| <b>149</b> | <b>ZINC000005360885</b> | <b>-10.9</b>          | <b>-9.6</b> | <b>-1.3</b>  |
| 150        | ZINC000001758646        | -10.9                 | -9.5        | -1.4         |
| 151        | ZINC000004003438        | -10.9                 | -9.5        | -1.4         |
| 152        | ZINC000005088834        | -10.9                 | -9.5        | -1.4         |
| 153        | ZINC000014240188        | -10.9                 | -9.5        | -1.4         |
| 154        | ZINC000029134573        | -10.9                 | -9.5        | -1.4         |
| <b>155</b> | <b>ZINC000069778215</b> | <b>-10.9</b>          | <b>-9.5</b> | <b>-1.4</b>  |
| 156        | ZINC000084598174        | -10.9                 | -9.5        | -1.4         |
| <b>157</b> | <b>ZINC000084598177</b> | <b>-10.9</b>          | <b>-9.5</b> | <b>-1.4</b>  |
| 158        | ZINC000003438521        | -10.9                 | -9.4        | -1.5         |
| 159        | ZINC000008316344        | -10.9                 | -9.4        | -1.5         |
| 160        | ZINC000003245357        | -10.9                 | -9.3        | -1.6         |
| <b>161</b> | <b>ZINC000004998502</b> | <b>-10.9</b>          | <b>-9.3</b> | <b>-1.6</b>  |
| 162        | ZINC000006556210        | -10.9                 | -9.3        | -1.6         |
| 163        | ZINC000010218408        | -10.9                 | -9.3        | -1.6         |
| 164        | ZINC000040266307        | -10.9                 | -9.3        | -1.6         |
| 165        | ZINC000050859891        | -10.9                 | -9.3        | -1.6         |
| 166        | ZINC000072432742        | -10.9                 | -9.3        | -1.6         |
| 167        | ZINC000119429896        | -10.9                 | -9.3        | -1.6         |
| 168        | ZINC000257206611        | -10.9                 | -9.3        | -1.6         |
| 169        | ZINC000000390374        | -10.9                 | -9.2        | -1.7         |
| <b>170</b> | <b>ZINC000022191233</b> | <b>-10.9</b>          | <b>-9.2</b> | <b>-1.7</b>  |
| <b>171</b> | <b>ZINC000071915224</b> | <b>-10.9</b>          | <b>-9.2</b> | <b>-1.7</b>  |
| 172        | ZINC000001711692        | -10.9                 | -9.1        | -1.8         |
| 173        | ZINC000006576136        | -10.9                 | -9.1        | -1.8         |
| 174        | ZINC000008738218        | -10.9                 | -9.1        | -1.8         |
| 175        | ZINC000012875967        | -10.9                 | -9.1        | -1.8         |
| 176        | ZINC000153353600        | -10.9                 | -9.1        | -1.8         |
| 177        | ZINC000229224134        | -10.9                 | -9.1        | -1.8         |

| #          | ZINC ID                    | VINA score (kcal/mol) |             |              |
|------------|----------------------------|-----------------------|-------------|--------------|
|            |                            | IRAP                  | ERAP1       | <i>Delta</i> |
| 178        | ZINC000584897275           | -10.9                 | -9.1        | -1.8         |
| <b>179</b> | <b>ZINC000000333210</b>    | <b>-10.9</b>          | <b>-9.0</b> | <b>-1.9</b>  |
| 180        | ZINC0000002465084          | -10.9                 | -9.0        | -1.9         |
| 181        | ZINC0000004535480          | -10.9                 | -9.0        | -1.9         |
| 182        | ZINC00000047209496         | -10.9                 | -9.0        | -1.9         |
| 183        | ZINC000000135810445        | -10.9                 | -9.0        | -1.9         |
| 184        | ZINC000000253433605        | -10.9                 | -9.0        | -1.9         |
| 185        | ZINC0000002646979          | -10.9                 | -8.9        | -2.0         |
| 186        | ZINC00000011781217         | -10.9                 | -8.9        | -2.0         |
| 187        | ZINC00000072300733         | -10.9                 | -8.9        | -2.0         |
| 188        | ZINC00000075530760         | -10.9                 | -8.9        | -2.0         |
| 189        | ZINC00000091943530         | -10.9                 | -8.9        | -2.0         |
| 190        | ZINC00000020116324         | -10.9                 | -8.8        | -2.1         |
| 191        | ZINC00000050857092         | -10.9                 | -8.8        | -2.1         |
| 192        | ZINC00000069538683         | -10.9                 | -8.8        | -2.1         |
| 193        | ZINC00000074014922         | -10.9                 | -8.8        | -2.1         |
| 194        | ZINC000000284798034        | -10.9                 | -8.8        | -2.1         |
| 195        | ZINC0000001465257          | -10.9                 | -8.7        | -2.2         |
| 196        | ZINC0000002922856          | -10.9                 | -8.7        | -2.2         |
| 197        | ZINC00000004732939         | -10.9                 | -8.7        | -2.2         |
| 198        | ZINC00000005776998         | -10.9                 | -8.7        | -2.2         |
| 199        | ZINC00000006887927         | -10.9                 | -8.7        | -2.2         |
| 200        | ZINC000000040548686        | -10.9                 | -8.7        | -2.2         |
| 201        | ZINC000000041546843        | -10.9                 | -8.7        | -2.2         |
| <b>202</b> | <b>ZINC00000043550595</b>  | <b>-10.9</b>          | <b>-8.7</b> | <b>-2.2</b>  |
| 203        | ZINC000000089827814        | -10.9                 | -8.7        | -2.2         |
| 204        | ZINC000000177842371        | -10.9                 | -8.7        | -2.2         |
| 205        | ZINC0000000585093122       | -10.9                 | -8.7        | -2.2         |
| 206        | ZINC00000000390138         | -10.9                 | -8.6        | -2.3         |
| 207        | ZINC000000003292603        | -10.9                 | -8.6        | -2.3         |
| <b>208</b> | <b>ZINC000000240454699</b> | <b>-10.9</b>          | <b>-8.6</b> | <b>-2.3</b>  |
| 209        | ZINC0000000079035          | -10.9                 | -8.5        | -2.4         |
| <b>210</b> | <b>ZINC000000044919578</b> | <b>-10.9</b>          | <b>-8.5</b> | <b>-2.4</b>  |
| 211        | ZINC000000069846908        | -10.9                 | -8.5        | -2.4         |
| 212        | ZINC000000072096437        | -10.9                 | -8.5        | -2.4         |
| 213        | ZINC000000091304527        | -10.9                 | -8.5        | -2.4         |
| 214        | ZINC000000027755553        | -10.9                 | -8.4        | -2.5         |
| <b>215</b> | <b>ZINC00000008913866</b>  | <b>-10.9</b>          | <b>-8.3</b> | <b>-2.6</b>  |
| 216        | ZINC000000012867343        | -10.9                 | -8.3        | -2.6         |
| 217        | ZINC000000077353582        | -10.9                 | -8.3        | -2.6         |
| 218        | ZINC000000095415911        | -10.9                 | -8.3        | -2.6         |
| 219        | ZINC000000097105546        | -10.9                 | -8.3        | -2.6         |
| 220        | ZINC000000012508838        | -10.9                 | -8.2        | -2.7         |
| 221        | ZINC0000000334003030       | -10.9                 | -8.1        | -2.8         |
| 222        | ZINC00000000326909         | -10.9                 | -7.9        | -3.0         |

**Table S2.** Top-ranked selection of compounds based on their difference in the estimated binding affinity for IRAP versus ERAP1 ( $\Delta\Delta G_{\text{bind}}^{(\text{IRAP})} - \Delta\Delta G_{\text{bind}}^{(\text{ERAP1})}$ ). Their ranking (#) is relative to the affinity for IRAP and follows that of **Table S1**. Entries marked in boldface indicate compounds that were finally selected for experimental screening.

| #          | ZINC ID                 | VINA score (kcal/mol) |             |                                |
|------------|-------------------------|-----------------------|-------------|--------------------------------|
|            |                         | IRAP                  | ERAP1       | $\Delta\Delta G_{\text{bind}}$ |
| 223        | ZINC000008609997        | -10.8                 | -8.3        | -2.5                           |
| 224        | ZINC000097105494        | -10.8                 | -8.3        | -2.5                           |
| 225        | ZINC000013692677        | -10.8                 | -8.2        | -2.6                           |
| 226        | ZINC000023764785        | -10.8                 | -8.2        | -2.6                           |
| <b>227</b> | <b>ZINC000003463362</b> | <b>-10.8</b>          | <b>-8.1</b> | <b>-2.7</b>                    |
| 228        | ZINC000257218603        | -10.8                 | -7.9        | -2.9                           |
| 229        | ZINC000091664087        | -10.8                 | -7.4        | -3.4                           |
| 230        | ZINC000000082954        | -10.7                 | -8.2        | -2.5                           |
| 231        | ZINC000002837442        | -10.7                 | -8.2        | -2.5                           |
| 232        | ZINC000005303591        | -10.7                 | -8.2        | -2.5                           |
| <b>233</b> | <b>ZINC000025032259</b> | <b>-10.7</b>          | <b>-8.1</b> | <b>-2.6</b>                    |
| 234        | ZINC000100119126        | -10.7                 | -8.0        | -2.7                           |
| 235        | ZINC000012142779        | -10.7                 | -7.9        | -2.8                           |
| 236        | ZINC000012239509        | -10.7                 | -7.9        | -2.8                           |
| 237        | ZINC000065463577        | -10.7                 | -7.9        | -2.8                           |
| 238        | ZINC000050584912        | -10.7                 | -7.6        | -3.1                           |
| 239        | ZINC000040386093        | -10.7                 | -7.5        | -3.2                           |
| 240        | ZINC000092760184        | -10.7                 | -7.5        | -3.2                           |
| 241        | ZINC000252509448        | -10.7                 | -7.4        | -3.3                           |
| 242        | ZINC000004806959        | -10.6                 | -8.1        | -2.5                           |
| <b>243</b> | <b>ZINC000008595944</b> | <b>-10.6</b>          | <b>-8.1</b> | <b>-2.5</b>                    |
| 244        | ZINC000040386114        | -10.6                 | -8.1        | -2.5                           |
| 245        | ZINC000215185750        | -10.6                 | -8.1        | -2.5                           |
| 246        | ZINC000253407066        | -10.6                 | -8.1        | -2.5                           |
| 247        | ZINC000575618196        | -10.6                 | -8.1        | -2.5                           |
| 248        | ZINC000096024249        | -10.6                 | -8.0        | -2.6                           |
| 249        | ZINC000021722970        | -10.6                 | -7.9        | -2.7                           |
| 250        | ZINC000067460397        | -10.6                 | -7.9        | -2.7                           |
| 251        | ZINC000096003964        | -10.6                 | -7.9        | -2.7                           |
| 252        | ZINC000306141880        | -10.6                 | -7.4        | -3.2                           |
| 253        | ZINC000100737122        | -10.6                 | -7.1        | -3.5                           |
| 254        | ZINC000095402766        | -10.6                 | -6.9        | -3.7                           |
| 255        | ZINC000014901170        | -10.5                 | -8.0        | -2.5                           |
| <b>256</b> | <b>ZINC000084578820</b> | <b>-10.5</b>          | <b>-8.0</b> | <b>-2.5</b>                    |
| 257        | ZINC000274936458        | -10.5                 | -8.0        | -2.5                           |
| 258        | ZINC000096249561        | -10.5                 | -7.9        | -2.6                           |
| 259        | ZINC000001580185        | -10.5                 | -7.7        | -2.8                           |
| 260        | ZINC000004495846        | -10.5                 | -7.6        | -2.9                           |
| 261        | ZINC000257299555        | -10.5                 | -7.6        | -2.9                           |
| 262        | ZINC000012122382        | -10.5                 | -7.5        | -3.0                           |



| #          | ZINC ID                 | VINA score (kcal/mol) |             |              |
|------------|-------------------------|-----------------------|-------------|--------------|
|            |                         | IRAP                  | ERAP1       | <i>Delta</i> |
| 263        | ZINC000075530913        | -10.5                 | -7.3        | -3.2         |
| 264        | ZINC000040386098        | -10.4                 | -7.9        | -2.5         |
| <b>265</b> | <b>ZINC000069562405</b> | <b>-10.4</b>          | <b>-7.9</b> | <b>-2.5</b>  |
| <b>266</b> | <b>ZINC000079491038</b> | <b>-10.4</b>          | <b>-7.8</b> | <b>-2.6</b>  |
| 267        | ZINC000006669352        | -10.4                 | -7.7        | -2.7         |
| 268        | ZINC000012142783        | -10.4                 | -7.7        | -2.7         |
| 269        | ZINC000238831563        | -10.4                 | -7.7        | -2.7         |
| 270        | ZINC000253473237        | -10.4                 | -7.7        | -2.7         |
| 271        | ZINC000257192562        | -10.4                 | -7.7        | -2.7         |
| 272        | ZINC000238841632        | -10.4                 | -7.6        | -2.8         |
| 273        | ZINC000257311417        | -10.4                 | -7.6        | -2.8         |
| 274        | ZINC000095950700        | -10.4                 | -7.5        | -2.9         |
| 275        | ZINC000306138347        | -10.4                 | -7.5        | -2.9         |
| 276        | ZINC000081397352        | -10.4                 | -7.4        | -3.0         |
| 277        | ZINC000096201851        | -10.4                 | -7.4        | -3.0         |
| 278        | ZINC000278659999        | -10.4                 | -7.4        | -3.0         |
| 279        | ZINC000092021781        | -10.4                 | -7.3        | -3.1         |
| 280        | ZINC000091270544        | -10.4                 | -7.1        | -3.3         |
| 281        | ZINC000005023816        | -10.3                 | -7.8        | -2.5         |
| 282        | ZINC000012888207        | -10.3                 | -7.8        | -2.5         |
| 283        | ZINC000014741626        | -10.3                 | -7.8        | -2.5         |
| 284        | ZINC000061717590        | -10.3                 | -7.8        | -2.5         |
| 285        | ZINC000069349055        | -10.3                 | -7.8        | -2.5         |
| 286        | ZINC000170016387        | -10.3                 | -7.8        | -2.5         |
| 287        | ZINC000584887110        | -10.3                 | -7.8        | -2.5         |
| <b>288</b> | <b>ZINC000002216953</b> | <b>-10.3</b>          | <b>-7.7</b> | <b>-2.6</b>  |
| 289        | ZINC000006918427        | -10.3                 | -7.7        | -2.6         |
| 290        | ZINC000065249112        | -10.3                 | -7.7        | -2.6         |
| 291        | ZINC000065625052        | -10.3                 | -7.7        | -2.6         |
| 292        | ZINC000075118384        | -10.3                 | -7.7        | -2.6         |
| 293        | ZINC000119149039        | -10.3                 | -7.7        | -2.6         |
| 294        | ZINC000065248686        | -10.3                 | -7.6        | -2.7         |
| 295        | ZINC000065591272        | -10.3                 | -7.6        | -2.7         |
| 296        | ZINC000005026046        | -10.3                 | -7.5        | -2.8         |
| 297        | ZINC000058099587        | -10.3                 | -7.3        | -3.0         |
| 298        | ZINC000154455008        | -10.3                 | -7.3        | -3.0         |
| 299        | ZINC000091486946        | -10.3                 | -7.2        | -3.1         |
| 300        | ZINC000170800517        | -10.3                 | -7.1        | -3.2         |
| 301        | ZINC000000062112        | -10.2                 | -7.7        | -2.5         |
| 302        | ZINC000005244779        | -10.2                 | -7.7        | -2.5         |
| 303        | ZINC000006782318        | -10.2                 | -7.7        | -2.5         |
| <b>304</b> | <b>ZINC000018148904</b> | <b>-10.2</b>          | <b>-7.7</b> | <b>-2.5</b>  |
| 305        | ZINC000069492530        | -10.2                 | -7.7        | -2.5         |
| 306        | ZINC000079001413        | -10.2                 | -7.7        | -2.5         |
| 307        | ZINC000000199600        | -10.2                 | -7.6        | -2.6         |

| #          | ZINC ID                 | VINA score (kcal/mol) |             |              |
|------------|-------------------------|-----------------------|-------------|--------------|
|            |                         | IRAP                  | ERAP1       | <i>Delta</i> |
| 308        | ZINC000003327891        | -10.2                 | -7.6        | -2.6         |
| 309        | ZINC000004483817        | -10.2                 | -7.6        | -2.6         |
| 310        | ZINC000042025678        | -10.2                 | -7.6        | -2.6         |
| 311        | ZINC000057526383        | -10.2                 | -7.6        | -2.6         |
| 312        | ZINC000065395709        | -10.2                 | -7.6        | -2.6         |
| 313        | ZINC000096058349        | -10.2                 | -7.6        | -2.6         |
| 314        | ZINC000257256038        | -10.2                 | -7.6        | -2.6         |
| 315        | ZINC000006660103        | -10.2                 | -7.5        | -2.7         |
| 316        | ZINC000057526528        | -10.2                 | -7.5        | -2.7         |
| <b>317</b> | <b>ZINC000091486133</b> | <b>-10.2</b>          | <b>-7.5</b> | <b>-2.7</b>  |
| 318        | ZINC000097050589        | -10.2                 | -7.5        | -2.7         |
| 319        | ZINC000330033487        | -10.2                 | -7.5        | -2.7         |
| <b>320</b> | <b>ZINC000095410774</b> | <b>-10.2</b>          | <b>-7.4</b> | <b>-2.8</b>  |
| 321        | ZINC000096199614        | -10.2                 | -7.4        | -2.8         |
| 322        | ZINC000000551535        | -10.2                 | -7.2        | -3.0         |
| 323        | ZINC000096201858        | -10.2                 | -6.9        | -3.3         |
| 324        | ZINC0000002390471       | -10.1                 | -7.6        | -2.5         |
| <b>325</b> | <b>ZINC000004511530</b> | <b>-10.1</b>          | <b>-7.6</b> | <b>-2.5</b>  |
| 326        | ZINC000005348603        | -10.1                 | -7.6        | -2.5         |
| 327        | ZINC000012407997        | -10.1                 | -7.6        | -2.5         |
| 328        | ZINC000096010936        | -10.1                 | -7.6        | -2.5         |
| 329        | ZINC000097086417        | -10.1                 | -7.6        | -2.5         |
| 330        | ZINC000195547314        | -10.1                 | -7.6        | -2.5         |
| 331        | ZINC000215185695        | -10.1                 | -7.6        | -2.5         |
| 332        | ZINC000225489282        | -10.1                 | -7.6        | -2.5         |
| 333        | ZINC000237955843        | -10.1                 | -7.6        | -2.5         |
| 334        | ZINC000588229346        | -10.1                 | -7.6        | -2.5         |
| 335        | ZINC000057526426        | -10.1                 | -7.5        | -2.6         |
| 336        | ZINC000069740630        | -10.1                 | -7.5        | -2.6         |
| 337        | ZINC000071282106        | -10.1                 | -7.5        | -2.6         |
| 338        | ZINC000092078469        | -10.1                 | -7.4        | -2.7         |
| 339        | ZINC000096158052        | -10.1                 | -7.4        | -2.7         |
| 340        | ZINC000096251711        | -10.1                 | -7.4        | -2.7         |
| 341        | ZINC000000106944        | -10.1                 | -7.3        | -2.8         |
| 342        | ZINC000092022499        | -10.1                 | -7.3        | -2.8         |
| 343        | ZINC000334160460        | -10.1                 | -7.3        | -2.8         |
| 344        | ZINC000091321614        | -10.1                 | -7.2        | -2.9         |
| 345        | ZINC000096069677        | -10.1                 | -7.2        | -2.9         |
| <b>346</b> | <b>ZINC000023642159</b> | <b>-10.1</b>          | <b>-7.1</b> | <b>-3.0</b>  |
| 347        | ZINC000096240774        | -10.1                 | -7.1        | -3.0         |
| 348        | ZINC000001648546        | -10.1                 | -7.0        | -3.1         |
| 349        | ZINC000001381807        | -10.0                 | -7.5        | -2.5         |
| 350        | ZINC000095375482        | -10.0                 | -7.5        | -2.5         |
| 351        | ZINC000192929211        | -10.0                 | -7.5        | -2.5         |
| 352        | ZINC000229623928        | -10.0                 | -7.5        | -2.5         |

| #          | ZINC ID                 | VINA score (kcal/mol) |             |              |
|------------|-------------------------|-----------------------|-------------|--------------|
|            |                         | IRAP                  | ERAP1       | <i>Delta</i> |
| 353        | ZINC000253433258        | -10.0                 | -7.5        | -2.5         |
| 354        | ZINC000000201272        | -10.0                 | -7.4        | -2.6         |
| 355        | ZINC000020729822        | -10.0                 | -7.4        | -2.6         |
| 356        | ZINC000057526442        | -10.0                 | -7.4        | -2.6         |
| 357        | ZINC000065507679        | -10.0                 | -7.4        | -2.6         |
| 358        | ZINC000096038482        | -10.0                 | -7.4        | -2.6         |
| 359        | ZINC000096069669        | -10.0                 | -7.4        | -2.6         |
| 360        | ZINC000100756927        | -10.0                 | -7.4        | -2.6         |
| 361        | ZINC000237699092        | -10.0                 | -7.4        | -2.6         |
| 362        | ZINC000238121810        | -10.0                 | -7.4        | -2.6         |
| 363        | ZINC000064871452        | -10.0                 | -7.3        | -2.7         |
| 364        | ZINC000092065698        | -10.0                 | -7.3        | -2.7         |
| 365        | ZINC000092077873        | -10.0                 | -7.3        | -2.7         |
| 366        | ZINC000245171655        | -10.0                 | -7.3        | -2.7         |
| 367        | ZINC000071497775        | -10.0                 | -7.0        | -3.0         |
| 368        | ZINC000018240833        | -9.9                  | -7.4        | -2.5         |
| 369        | ZINC000022067509        | -9.9                  | -7.4        | -2.5         |
| <b>370</b> | <b>ZINC000035869910</b> | <b>-9.9</b>           | <b>-7.4</b> | <b>-2.5</b>  |
| 371        | ZINC000040385915        | -9.9                  | -7.4        | -2.5         |
| 372        | ZINC000055418850        | -9.9                  | -7.4        | -2.5         |
| 373        | ZINC000065170071        | -9.9                  | -7.4        | -2.5         |
| 374        | ZINC000069895275        | -9.9                  | -7.4        | -2.5         |
| 375        | ZINC000071746202        | -9.9                  | -7.4        | -2.5         |
| <b>376</b> | <b>ZINC000091270543</b> | <b>-9.9</b>           | <b>-7.4</b> | <b>-2.5</b>  |
| 377        | ZINC000091487017        | -9.9                  | -7.4        | -2.5         |
| 378        | ZINC000095503625        | -9.9                  | -7.4        | -2.5         |
| 379        | ZINC000237740654        | -9.9                  | -7.4        | -2.5         |
| 380        | ZINC000238886413        | -9.9                  | -7.4        | -2.5         |
| 381        | ZINC000409428381        | -9.9                  | -7.4        | -2.5         |
| 382        | ZINC000000353960        | -9.9                  | -7.3        | -2.6         |
| 383        | ZINC000000389450        | -9.9                  | -7.3        | -2.6         |
| 384        | ZINC000002630701        | -9.9                  | -7.3        | -2.6         |
| 385        | ZINC000005202436        | -9.9                  | -7.3        | -2.6         |
| 386        | ZINC000057731402        | -9.9                  | -7.3        | -2.6         |
| 387        | ZINC000072235028        | -9.9                  | -7.3        | -2.6         |
| 388        | ZINC000095989182        | -9.9                  | -7.3        | -2.6         |
| 389        | ZINC000169680567        | -9.9                  | -7.3        | -2.6         |
| 390        | ZINC000019328346        | -9.9                  | -7.2        | -2.7         |
| <b>391</b> | <b>ZINC000015078577</b> | <b>-9.9</b>           | <b>-7.1</b> | <b>-2.8</b>  |
| 392        | ZINC000006490389        | -9.9                  | -7.0        | -2.9         |
| 393        | ZINC000096251709        | -9.9                  | -7.0        | -2.9         |
| 394        | ZINC000216315534        | -9.9                  | -6.7        | -3.2         |
| 395        | ZINC000005202682        | -9.8                  | -7.3        | -2.5         |
| 396        | ZINC000029054164        | -9.8                  | -7.3        | -2.5         |
| 397        | ZINC000069595091        | -9.8                  | -7.3        | -2.5         |

| #          | ZINC ID                 | VINA score (kcal/mol) |             |              |
|------------|-------------------------|-----------------------|-------------|--------------|
|            |                         | IRAP                  | ERAP1       | <i>Delta</i> |
| 398        | ZINC000072234903        | -9.8                  | -7.3        | -2.5         |
| 399        | ZINC000075140034        | -9.8                  | -7.3        | -2.5         |
| 400        | ZINC000091663451        | -9.8                  | -7.3        | -2.5         |
| 401        | ZINC000096069697        | -9.8                  | -7.3        | -2.5         |
| 402        | ZINC000107713021        | -9.8                  | -7.3        | -2.5         |
| 403        | ZINC000092065700        | -9.8                  | -7.2        | -2.6         |
| 404        | ZINC000096069207        | -9.8                  | -7.2        | -2.6         |
| 405        | ZINC000096198984        | -9.8                  | -7.2        | -2.6         |
| 406        | ZINC000257317306        | -9.8                  | -7.2        | -2.6         |
| 407        | ZINC000328587242        | -9.8                  | -7.2        | -2.6         |
| <b>408</b> | <b>ZINC000069737923</b> | <b>-9.8</b>           | <b>-7.1</b> | <b>-2.7</b>  |
| 409        | ZINC000238872716        | -9.8                  | -7.1        | -2.7         |
| 410        | ZINC000003641308        | -9.7                  | -7.2        | -2.5         |
| 411        | ZINC000040060202        | -9.7                  | -7.2        | -2.5         |
| 412        | ZINC000040385901        | -9.7                  | -7.2        | -2.5         |
| 413        | ZINC000096081777        | -9.7                  | -7.2        | -2.5         |
| 414        | ZINC000585280336        | -9.7                  | -7.2        | -2.5         |
| 415        | ZINC000002750765        | -9.7                  | -7.1        | -2.6         |
| 416        | ZINC000096080454        | -9.7                  | -7.1        | -2.6         |
| 417        | ZINC000096198954        | -9.7                  | -7.1        | -2.6         |
| 418        | ZINC000097201269        | -9.7                  | -7.1        | -2.6         |
| 419        | ZINC000121632943        | -9.7                  | -7.0        | -2.7         |
| 420        | ZINC000257222272        | -9.7                  | -7.0        | -2.7         |
| 421        | ZINC000071754931        | -9.7                  | -6.9        | -2.8         |
| 422        | ZINC000091768990        | -9.7                  | -6.9        | -2.8         |
| 423        | ZINC000257270100        | -9.7                  | -6.8        | -2.9         |

**Table S3.** Energy decomposition of the MM/PBSA results for the 305 compounds using the *PB-1* parameter set (for more details see the Methods section). All energy terms are given in kcal/mol and are sorted by the binding free energy ( $\Delta G_{\text{bind}}$ ), followed by the molecular mechanics van der Waals and electrostatic interactions terms ( $\Delta E_{\text{vdW}}$  and  $\Delta E_{\text{el}}$ ), the polar contribution to the solvation free energy ( $\Delta G_{\text{pol}}$ ), the cavity formation and the van der Waals (dispersion) free energy terms that comprise the non-polar solvation free energy ( $\Delta G_{\text{np}}$  and  $\Delta G_{\text{disp}}$ ). Compounds marked in boldface were finally selected for experimental screening.

| #  | ZINC ID                 | $\Delta G_{\text{bind}}$ | $\Delta E_{\text{vdW}}$ | $\Delta E_{\text{el}}$ | $\Delta G_{\text{pol}}$ | $\Delta G_{\text{np}}$ | $\Delta G_{\text{disp}}$ |
|----|-------------------------|--------------------------|-------------------------|------------------------|-------------------------|------------------------|--------------------------|
| 1  | <b>ZINC000010256259</b> | <b>-15.7</b>             | <b>-52.7</b>            | <b>-41.4</b>           | <b>55.5</b>             | <b>-35.0</b>           | <b>58.0</b>              |
| 2  | <b>ZINC000035869910</b> | <b>-14.1</b>             | <b>-54.6</b>            | <b>-34.9</b>           | <b>50.1</b>             | <b>-36.8</b>           | <b>62.1</b>              |
| 3  | <b>ZINC000084578820</b> | <b>-13.9</b>             | <b>-47.8</b>            | <b>-35.2</b>           | <b>44.3</b>             | <b>-32.1</b>           | <b>56.9</b>              |
| 4  | ZINC000257317306        | -13.0                    | -50.1                   | -41.2                  | 53.5                    | -36.6                  | 61.4                     |
| 5  | ZINC000012888207        | -11.0                    | -40.8                   | -27.0                  | 35.4                    | -27.9                  | 49.2                     |
| 6  | <b>ZINC000015078577</b> | <b>-10.8</b>             | <b>-49.4</b>            | <b>-29.1</b>           | <b>42.5</b>             | <b>-34.7</b>           | <b>59.9</b>              |
| 7  | <b>ZINC000079491038</b> | <b>-10.5</b>             | <b>-51.3</b>            | <b>-27.7</b>           | <b>45.5</b>             | <b>-35.9</b>           | <b>59.0</b>              |
| 8  | <b>ZINC000084598177</b> | <b>-10.5</b>             | <b>-49.0</b>            | <b>-30.6</b>           | <b>43.6</b>             | <b>-32.1</b>           | <b>57.6</b>              |
| 9  | <b>ZINC000069562405</b> | <b>-9.8</b>              | <b>-47.4</b>            | <b>-25.3</b>           | <b>37.8</b>             | <b>-32.5</b>           | <b>57.5</b>              |
| 10 | <b>ZINC000005360885</b> | <b>-9.7</b>              | <b>-48.1</b>            | <b>-36.4</b>           | <b>51.7</b>             | <b>-31.8</b>           | <b>55.0</b>              |
| 11 | <b>ZINC000018148904</b> | <b>-9.5</b>              | <b>-50.1</b>            | <b>-32.7</b>           | <b>50.6</b>             | <b>-33.7</b>           | <b>56.3</b>              |
| 12 | <b>ZINC000022191233</b> | <b>-9.2</b>              | <b>-53.6</b>            | <b>-30.9</b>           | <b>51.0</b>             | <b>-36.6</b>           | <b>61.0</b>              |
| 13 | ZINC000096199614        | -9.1                     | -51.3                   | -27.5                  | 46.5                    | -32.0                  | 55.1                     |
| 14 | <b>ZINC000004511530</b> | <b>-8.6</b>              | <b>-49.2</b>            | <b>-22.6</b>           | <b>42.0</b>             | <b>-33.4</b>           | <b>54.6</b>              |
| 15 | ZINC000216315534        | -8.3                     | -41.9                   | -27.2                  | 37.8                    | -30.4                  | 53.3                     |
| 16 | <b>ZINC000000333210</b> | <b>-8.3</b>              | <b>-50.6</b>            | <b>-32.9</b>           | <b>51.4</b>             | <b>-33.1</b>           | <b>56.9</b>              |
| 17 | <b>ZINC000244816835</b> | <b>-8.1</b>              | <b>-43.8</b>            | <b>-34.1</b>           | <b>47.4</b>             | <b>-33.4</b>           | <b>55.7</b>              |
| 18 | <b>ZINC000044919578</b> | <b>-8.0</b>              | <b>-43.0</b>            | <b>-29.0</b>           | <b>40.4</b>             | <b>-29.6</b>           | <b>53.2</b>              |
| 19 | <b>ZINC000051467674</b> | <b>-8.0</b>              | <b>-46.6</b>            | <b>-40.6</b>           | <b>55.1</b>             | <b>-32.5</b>           | <b>56.6</b>              |
| 20 | <b>ZINC000091270543</b> | <b>-7.8</b>              | <b>-53.6</b>            | <b>-21.4</b>           | <b>39.3</b>             | <b>-36.1</b>           | <b>64.0</b>              |
| 21 | <b>ZINC000069737923</b> | <b>-7.7</b>              | <b>-46.3</b>            | <b>-29.6</b>           | <b>42.9</b>             | <b>-33.1</b>           | <b>58.4</b>              |
| 22 | <b>ZINC000223692657</b> | <b>-7.5</b>              | <b>-50.8</b>            | <b>-27.8</b>           | <b>47.9</b>             | <b>-33.1</b>           | <b>56.3</b>              |
| 23 | <b>ZINC000095410774</b> | <b>-7.4</b>              | <b>-50.5</b>            | <b>-22.8</b>           | <b>42.7</b>             | <b>-32.4</b>           | <b>55.7</b>              |
| 24 | <b>ZINC000003463362</b> | <b>-7.3</b>              | <b>-50.0</b>            | <b>-30.0</b>           | <b>43.6</b>             | <b>-34.3</b>           | <b>63.4</b>              |
| 25 | <b>ZINC000240454699</b> | <b>-7.0</b>              | <b>-42.5</b>            | <b>-24.0</b>           | <b>35.5</b>             | <b>-30.9</b>           | <b>54.9</b>              |
| 26 | ZINC000096058349        | -6.6                     | -54.1                   | -18.0                  | 40.5                    | -34.1                  | 59.2                     |
| 27 | <b>ZINC000095415912</b> | <b>-6.5</b>              | <b>-53.2</b>            | <b>-29.2</b>           | <b>50.0</b>             | <b>-34.5</b>           | <b>60.4</b>              |
| 28 | ZINC000067460397        | -6.4                     | -50.1                   | -35.5                  | 55.7                    | -31.9                  | 55.4                     |
| 29 | ZINC000013973188        | -6.2                     | -47.2                   | -29.6                  | 47.3                    | -31.7                  | 54.9                     |
| 30 | ZINC000014791001        | -6.0                     | -47.0                   | -21.3                  | 39.9                    | -32.3                  | 54.6                     |
| 31 | ZINC000084686490        | -5.9                     | -46.1                   | -33.1                  | 50.5                    | -33.3                  | 56.1                     |
| 32 | ZINC000334160460        | -5.9                     | -49.1                   | -22.2                  | 40.1                    | -33.4                  | 58.7                     |
| 33 | <b>ZINC000071915224</b> | <b>-5.8</b>              | <b>-49.3</b>            | <b>-26.0</b>           | <b>43.6</b>             | <b>-32.7</b>           | <b>58.7</b>              |
| 34 | ZINC000074014922        | -5.8                     | -47.0                   | -9.6                   | 29.3                    | -31.1                  | 52.6                     |
| 35 | ZINC000257299555        | -5.7                     | -46.7                   | -36.0                  | 51.2                    | -31.6                  | 57.4                     |
| 36 | ZINC000091270544        | -5.6                     | -52.4                   | -22.1                  | 41.6                    | -35.4                  | 62.7                     |
| 37 | ZINC000575618196        | -5.6                     | -54.5                   | -27.7                  | 50.3                    | -34.9                  | 61.2                     |

| #         | ZINC ID                 | $\Delta G_{\text{bind}}$ | $\Delta E_{\text{vdW}}$ | $\Delta E_{\text{el}}$ | $\Delta G_{\text{pol}}$ | $\Delta G_{\text{np}}$ | $\Delta G_{\text{disp}}$ |
|-----------|-------------------------|--------------------------|-------------------------|------------------------|-------------------------|------------------------|--------------------------|
| 38        | ZINC000154455008        | -5.5                     | -44.9                   | -15.2                  | 33.2                    | -32.7                  | 54.2                     |
| 39        | ZINC000194368147        | -5.4                     | -48.3                   | -30.0                  | 49.2                    | -32.7                  | 56.3                     |
| 40        | ZINC000071754931        | -5.2                     | -40.8                   | -12.2                  | 24.4                    | -29.3                  | 52.7                     |
| <b>41</b> | <b>ZINC000043550595</b> | <b>-5.1</b>              | <b>-48.3</b>            | <b>-29.1</b>           | <b>46.5</b>             | <b>-33.6</b>           | <b>59.4</b>              |
| <b>42</b> | <b>ZINC000008595944</b> | <b>-5.0</b>              | <b>-53.1</b>            | <b>-13.9</b>           | <b>37.5</b>             | <b>-34.0</b>           | <b>58.4</b>              |
| <b>43</b> | <b>ZINC000069778215</b> | <b>-5.0</b>              | <b>-47.6</b>            | <b>-42.2</b>           | <b>60.1</b>             | <b>-33.8</b>           | <b>58.5</b>              |
| 44        | ZINC000100193430        | -5.0                     | -47.9                   | -13.6                  | 33.4                    | -30.3                  | 53.4                     |
| 45        | ZINC000003438521        | -4.9                     | -45.4                   | -22.7                  | 39.2                    | -30.9                  | 54.8                     |
| 46        | ZINC000075530913        | -4.8                     | -49.2                   | -20.2                  | 37.5                    | -34.1                  | 61.2                     |
| 47        | ZINC000225746732        | -4.8                     | -47.5                   | -20.8                  | 38.7                    | -30.9                  | 55.6                     |
| 48        | ZINC000003641308        | -4.7                     | -45.0                   | -25.7                  | 44.0                    | -31.2                  | 53.1                     |
| 49        | ZINC000018053795        | -4.7                     | -47.5                   | -22.6                  | 42.2                    | -31.9                  | 55.1                     |
| <b>50</b> | <b>ZINC000008913866</b> | <b>-4.7</b>              | <b>-50.7</b>            | <b>-28.3</b>           | <b>48.7</b>             | <b>-33.7</b>           | <b>59.4</b>              |
| <b>51</b> | <b>ZINC000057563200</b> | <b>-4.5</b>              | <b>-49.9</b>            | <b>-17.6</b>           | <b>37.5</b>             | <b>-33.9</b>           | <b>59.3</b>              |
| 52        | ZINC000044874685        | -4.4                     | -44.2                   | -22.4                  | 37.9                    | -32.2                  | 56.5                     |
| <b>53</b> | <b>ZINC000002216953</b> | <b>-4.4</b>              | <b>-48.7</b>            | <b>-24.8</b>           | <b>43.1</b>             | <b>-33.0</b>           | <b>59.0</b>              |
| 54        | ZINC000095469884        | -4.4                     | -40.0                   | -35.7                  | 49.2                    | -28.5                  | 50.7                     |
| 55        | ZINC000195547314        | -4.3                     | -50.9                   | -13.5                  | 34.8                    | -34.5                  | 59.7                     |
| 56        | ZINC000100193536        | -4.3                     | -48.7                   | -15.8                  | 35.4                    | -31.6                  | 56.4                     |
| 57        | ZINC000021835963        | -4.3                     | -48.7                   | -26.2                  | 46.3                    | -33.7                  | 58.0                     |
| 58        | ZINC000092078469        | -4.3                     | -45.0                   | -23.4                  | 37.6                    | -31.0                  | 57.5                     |
| 59        | ZINC000230113696        | -4.3                     | -52.9                   | -22.8                  | 44.8                    | -34.9                  | 61.4                     |
| 60        | ZINC000057731402        | -4.3                     | -51.2                   | -25.2                  | 44.7                    | -34.1                  | 61.5                     |
| 61        | ZINC000012142783        | -4.2                     | -51.0                   | -21.5                  | 41.3                    | -34.4                  | 61.4                     |
| 62        | ZINC000091768990        | -4.1                     | -52.4                   | -13.3                  | 35.4                    | -33.6                  | 59.9                     |
| 63        | ZINC000092065700        | -4.0                     | -52.6                   | -19.8                  | 39.9                    | -34.9                  | 63.4                     |
| 64        | ZINC000006669352        | -4.0                     | -47.6                   | -23.0                  | 45.1                    | -33.4                  | 54.9                     |
| 65        | ZINC000238121810        | -4.0                     | -37.2                   | -88.8                  | 99.9                    | -31.3                  | 53.5                     |
| 66        | ZINC000016543876        | -3.9                     | -46.0                   | -16.9                  | 35.1                    | -31.4                  | 55.3                     |
| 67        | ZINC000306141880        | -3.9                     | -46.5                   | -29.1                  | 45.9                    | -32.0                  | 57.8                     |
| <b>68</b> | <b>ZINC000004998502</b> | <b>-3.9</b>              | <b>-53.5</b>            | <b>-40.0</b>           | <b>65.4</b>             | <b>-35.7</b>           | <b>59.9</b>              |
| 69        | ZINC000095950700        | -3.9                     | -48.8                   | -19.4                  | 37.5                    | -32.0                  | 58.9                     |
| 70        | ZINC000096003964        | -3.9                     | -49.1                   | -26.2                  | 49.3                    | -32.8                  | 55.0                     |
| 71        | ZINC000009338249        | -3.8                     | -47.0                   | -27.4                  | 46.6                    | -30.6                  | 54.7                     |
| 72        | ZINC000585093122        | -3.2                     | -45.2                   | -16.8                  | 34.3                    | -30.8                  | 55.2                     |
| 73        | ZINC000091943530        | -3.1                     | -44.1                   | -16.2                  | 33.7                    | -31.4                  | 55.0                     |
| 74        | ZINC000092022499        | -3.1                     | -53.4                   | -23.1                  | 45.3                    | -35.3                  | 63.3                     |
| <b>75</b> | <b>ZINC000025032259</b> | <b>-3.0</b>              | <b>-54.4</b>            | <b>-21.9</b>           | <b>48.0</b>             | <b>-37.3</b>           | <b>62.6</b>              |
| 76        | ZINC000064871452        | -2.9                     | -49.9                   | -27.1                  | 48.2                    | -34.0                  | 59.9                     |
| 77        | ZINC000007030648        | -2.9                     | -43.3                   | -20.2                  | 37.0                    | -28.2                  | 51.8                     |
| 78        | ZINC000012323932        | -2.8                     | -42.7                   | -38.0                  | 53.3                    | -30.6                  | 55.2                     |
| 79        | ZINC000100119126        | -2.7                     | -47.3                   | -19.9                  | 41.2                    | -32.3                  | 55.7                     |
| 80        | ZINC000008738218        | -2.6                     | -41.0                   | -40.6                  | 57.0                    | -30.3                  | 52.3                     |
| 81        | ZINC000057526426        | -2.6                     | -44.4                   | -27.1                  | 44.7                    | -31.7                  | 56.0                     |
| 82        | ZINC000095951555        | -2.5                     | -42.9                   | -19.3                  | 36.6                    | -29.4                  | 52.4                     |
| 83        | ZINC000100191495        | -2.4                     | -46.6                   | -14.2                  | 35.4                    | -30.0                  | 53.0                     |

| #          | ZINC ID                 | $\Delta G_{\text{bind}}$ | $\Delta E_{\text{vdW}}$ | $\Delta E_{\text{el}}$ | $\Delta G_{\text{pol}}$ | $\Delta G_{\text{np}}$ | $\Delta G_{\text{disp}}$ |
|------------|-------------------------|--------------------------|-------------------------|------------------------|-------------------------|------------------------|--------------------------|
| 84         | ZINC000257211885        | -2.4                     | -50.3                   | -20.9                  | 42.3                    | -32.5                  | 59.1                     |
| 85         | ZINC000007030710        | -2.4                     | -47.3                   | -24.4                  | 43.8                    | -30.7                  | 56.3                     |
| 86         | ZINC000003313076        | -2.2                     | -41.7                   | -21.1                  | 37.8                    | -28.0                  | 50.8                     |
| 87         | ZINC000065248686        | -2.2                     | -45.7                   | -14.1                  | 33.4                    | -31.5                  | 55.7                     |
| 88         | ZINC000077503523        | -2.1                     | -45.1                   | -34.1                  | 52.5                    | -30.9                  | 55.5                     |
| 89         | ZINC000075140034        | -2.1                     | -41.8                   | -19.3                  | 35.3                    | -30.9                  | 54.7                     |
| 90         | ZINC000002630701        | -2.1                     | -49.0                   | -6.8                   | 30.1                    | -31.6                  | 55.0                     |
| 91         | ZINC000089827813        | -2.1                     | -46.6                   | -28.8                  | 49.3                    | -32.4                  | 56.3                     |
| 92         | ZINC000001381807        | -2.1                     | -37.1                   | -14.9                  | 29.6                    | -26.7                  | 47.1                     |
| 93         | ZINC000075118384        | -2.0                     | -46.9                   | -33.8                  | 55.2                    | -33.0                  | 56.5                     |
| 94         | ZINC000257192562        | -2.0                     | -45.9                   | -16.4                  | 34.9                    | -32.6                  | 58.1                     |
| 95         | ZINC000092760184        | -1.9                     | -47.5                   | -20.1                  | 39.5                    | -33.6                  | 59.8                     |
| 96         | ZINC000040473994        | -1.9                     | -49.6                   | -26.3                  | 48.1                    | -32.8                  | 58.7                     |
| 97         | ZINC000003292603        | -1.8                     | -47.2                   | -19.3                  | 38.6                    | -32.5                  | 58.6                     |
| 98         | ZINC000011781217        | -1.6                     | -52.0                   | -13.2                  | 39.2                    | -35.2                  | 59.6                     |
| 99         | ZINC000257206611        | -1.5                     | -55.3                   | -11.4                  | 39.7                    | -35.5                  | 61.0                     |
| 100        | ZINC000100737122        | -1.5                     | -52.3                   | -22.5                  | 48.3                    | -34.3                  | 59.3                     |
| 101        | ZINC000225489282        | -1.5                     | -49.8                   | -16.6                  | 40.0                    | -32.6                  | 57.5                     |
| 102        | ZINC000004722089        | -1.4                     | -48.1                   | -14.4                  | 35.5                    | -30.2                  | 55.8                     |
| 103        | ZINC000092021781        | -1.4                     | -49.3                   | -20.5                  | 42.5                    | -33.7                  | 59.7                     |
| 104        | ZINC000067643674        | -1.4                     | -44.8                   | -25.8                  | 45.4                    | -30.2                  | 54.0                     |
| <b>105</b> | <b>ZINC000091486133</b> | <b>-1.3</b>              | <b>-52.7</b>            | <b>-25.9</b>           | <b>47.8</b>             | <b>-34.7</b>           | <b>64.2</b>              |
| 106        | ZINC000008316344        | -1.2                     | -51.0                   | -4.6                   | 28.5                    | -33.0                  | 58.9                     |
| 107        | ZINC000069846908        | -1.2                     | -50.0                   | -33.8                  | 58.0                    | -34.1                  | 58.8                     |
| 108        | ZINC000019327176        | -1.1                     | -40.2                   | -26.8                  | 42.1                    | -27.8                  | 51.5                     |
| 109        | ZINC000035398834        | -1.1                     | -51.5                   | -9.7                   | 35.6                    | -33.1                  | 57.5                     |
| 110        | ZINC000095989182        | -1.0                     | -43.2                   | -18.7                  | 38.4                    | -28.9                  | 51.4                     |
| 111        | ZINC000584887110        | -1.0                     | -46.9                   | -14.2                  | 35.2                    | -32.1                  | 56.9                     |
| 112        | ZINC000097105546        | -1.0                     | -44.7                   | -22.4                  | 44.6                    | -30.0                  | 51.5                     |
| 113        | ZINC000096251711        | -0.9                     | -50.9                   | -15.0                  | 39.6                    | -33.2                  | 58.7                     |
| 114        | ZINC000229623928        | -0.9                     | -50.6                   | -34.1                  | 58.3                    | -33.9                  | 59.4                     |
| 115        | ZINC000096238948        | -0.9                     | -53.8                   | -13.0                  | 38.8                    | -34.3                  | 61.4                     |
| 116        | ZINC000171342968        | -0.7                     | -48.4                   | -39.2                  | 62.0                    | -33.5                  | 58.5                     |
| 117        | ZINC000096024249        | -0.7                     | -47.4                   | -18.1                  | 41.7                    | -29.3                  | 52.5                     |
| 118        | ZINC000050859891        | -0.6                     | -48.4                   | -29.5                  | 53.8                    | -31.1                  | 54.4                     |
| 119        | ZINC000072234903        | -0.6                     | -44.1                   | -12.5                  | 34.2                    | -30.6                  | 52.5                     |
| 120        | ZINC000257311417        | -0.5                     | -40.7                   | -23.4                  | 40.3                    | -29.5                  | 52.8                     |
| 121        | ZINC000014240188        | -0.5                     | -45.7                   | -17.2                  | 39.1                    | -31.1                  | 54.4                     |
| 122        | ZINC000278659999        | -0.4                     | -47.8                   | -23.7                  | 46.2                    | -33.0                  | 57.9                     |
| 123        | ZINC000257218603        | -0.4                     | -50.2                   | -24.7                  | 45.8                    | -35.0                  | 63.8                     |
| 124        | ZINC000022241454        | -0.3                     | -39.1                   | -38.4                  | 51.9                    | -26.7                  | 51.9                     |
| 125        | ZINC000002465084        | -0.3                     | -49.8                   | -23.7                  | 49.9                    | -32.8                  | 56.2                     |
| 126        | ZINC000095447759        | -0.3                     | -46.9                   | -24.8                  | 47.3                    | -30.8                  | 54.9                     |
| 127        | ZINC000069492530        | -0.1                     | -47.5                   | -19.0                  | 43.1                    | -31.1                  | 54.4                     |
| 128        | ZINC000119429896        | -0.1                     | -49.5                   | -9.9                   | 33.6                    | -33.8                  | 59.6                     |
| 129        | ZINC000000326909        | -0.1                     | -42.9                   | -17.0                  | 37.1                    | -27.4                  | 50.1                     |

| #          | ZINC ID                 | $\Delta G_{\text{bind}}$ | $\Delta E_{\text{vdW}}$ | $\Delta E_{\text{el}}$ | $\Delta G_{\text{pol}}$ | $\Delta G_{\text{np}}$ | $\Delta G_{\text{disp}}$ |
|------------|-------------------------|--------------------------|-------------------------|------------------------|-------------------------|------------------------|--------------------------|
| 130        | ZINC000257310083        | 0.0                      | -47.2                   | -16.6                  | 37.1                    | -31.2                  | 57.8                     |
| 131        | ZINC000096010936        | 0.0                      | -41.4                   | -26.7                  | 45.4                    | -31.7                  | 54.3                     |
| 132        | ZINC000010218408        | 0.0                      | -47.3                   | -19.2                  | 42.9                    | -29.7                  | 53.2                     |
| 133        | ZINC000077353582        | 0.0                      | -48.6                   | -15.4                  | 40.5                    | -30.7                  | 54.4                     |
| 134        | ZINC000091486946        | 0.1                      | -52.4                   | -21.3                  | 44.0                    | -34.8                  | 64.5                     |
| 135        | ZINC000002750765        | 0.1                      | -45.0                   | -24.4                  | 44.7                    | -31.5                  | 56.2                     |
| 136        | ZINC000135810445        | 0.1                      | -44.5                   | -31.9                  | 52.9                    | -30.9                  | 54.5                     |
| 137        | ZINC000069740630        | 0.1                      | -38.0                   | -20.4                  | 36.1                    | -28.9                  | 51.4                     |
| 138        | ZINC000177842371        | 0.1                      | -45.3                   | -26.9                  | 48.9                    | -28.9                  | 52.3                     |
| 139        | ZINC000096158052        | 0.2                      | -49.9                   | -20.8                  | 43.2                    | -34.2                  | 61.9                     |
| 140        | ZINC000040060202        | 0.2                      | -46.1                   | -17.7                  | 39.3                    | -33.7                  | 58.4                     |
| 141        | ZINC000253433259        | 0.3                      | -49.1                   | -19.7                  | 44.2                    | -31.4                  | 56.3                     |
| <b>142</b> | <b>ZINC000023642159</b> | <b>0.3</b>               | <b>-47.6</b>            | <b>-27.3</b>           | <b>48.4</b>             | <b>-32.0</b>           | <b>58.8</b>              |
| 143        | ZINC000095393415        | 0.4                      | -54.8                   | -14.5                  | 42.4                    | -32.4                  | 59.7                     |
| 144        | ZINC000257222272        | 0.5                      | -51.4                   | -7.3                   | 33.9                    | -34.8                  | 60.1                     |
| 145        | ZINC000328587242        | 0.5                      | -45.2                   | -23.7                  | 42.3                    | -34.1                  | 61.2                     |
| 146        | ZINC000002646979        | 0.5                      | -51.5                   | -22.3                  | 47.4                    | -32.2                  | 59.1                     |
| 147        | ZINC000238886413        | 0.5                      | -49.4                   | -11.6                  | 37.1                    | -32.3                  | 56.7                     |
| 148        | ZINC000097201269        | 0.7                      | -49.4                   | -16.9                  | 41.4                    | -35.5                  | 61.2                     |
| 149        | ZINC000065395709        | 0.7                      | -51.6                   | -22.3                  | 50.7                    | -35.3                  | 59.1                     |
| 150        | ZINC000006117573        | 0.8                      | -42.2                   | -28.0                  | 47.0                    | -30.2                  | 54.3                     |
| 151        | ZINC000016228943        | 0.8                      | -43.6                   | -26.3                  | 45.9                    | -29.4                  | 54.3                     |
| 152        | ZINC000040548686        | 0.9                      | -51.5                   | -23.2                  | 49.8                    | -32.4                  | 58.2                     |
| 153        | ZINC000042025678        | 1.0                      | -43.6                   | -12.3                  | 33.3                    | -29.1                  | 52.8                     |
| 154        | ZINC000192753414        | 1.1                      | -46.9                   | -32.1                  | 56.3                    | -31.0                  | 54.8                     |
| 155        | ZINC000069349055        | 1.1                      | -48.3                   | -24.2                  | 47.9                    | -34.0                  | 59.7                     |
| 156        | ZINC000058099587        | 1.2                      | -46.8                   | -18.8                  | 42.1                    | -31.9                  | 56.6                     |
| 157        | ZINC000004535480        | 1.2                      | -45.6                   | -15.4                  | 38.6                    | -28.7                  | 52.3                     |
| 158        | ZINC000005426253        | 1.2                      | -49.8                   | -11.6                  | 36.2                    | -34.6                  | 61.0                     |
| 159        | ZINC000050857093        | 1.2                      | -48.7                   | -25.4                  | 51.1                    | -32.3                  | 56.6                     |
| 160        | ZINC000178511392        | 1.3                      | -40.2                   | -33.5                  | 52.3                    | -29.5                  | 52.1                     |
| 161        | ZINC000005026046        | 1.3                      | -45.8                   | -14.0                  | 35.2                    | -30.4                  | 56.4                     |
| 162        | ZINC000095503625        | 1.4                      | -50.6                   | -24.3                  | 51.5                    | -34.5                  | 59.2                     |
| 163        | ZINC000035671101        | 1.4                      | -46.7                   | -8.2                   | 30.9                    | -29.8                  | 55.1                     |
| 164        | ZINC000069775761        | 1.5                      | -48.1                   | -21.8                  | 45.0                    | -32.2                  | 58.6                     |
| 165        | ZINC000097413355        | 1.6                      | -46.7                   | -27.5                  | 47.9                    | -30.7                  | 58.6                     |
| 166        | ZINC000013691850        | 1.6                      | -49.9                   | -15.3                  | 42.3                    | -31.2                  | 55.6                     |
| 167        | ZINC000585280336        | 1.6                      | -51.7                   | -30.1                  | 57.6                    | -32.2                  | 58.1                     |
| 168        | ZINC000050584912        | 1.6                      | -50.3                   | -6.3                   | 32.9                    | -33.4                  | 58.7                     |
| 169        | ZINC000069595091        | 1.8                      | -45.8                   | -22.4                  | 46.0                    | -32.7                  | 56.6                     |
| 170        | ZINC000022549345        | 1.8                      | -53.9                   | -18.2                  | 47.5                    | -34.7                  | 61.0                     |
| 171        | ZINC000409428381        | 1.8                      | -51.5                   | -12.2                  | 39.2                    | -35.9                  | 62.2                     |
| 172        | ZINC000072096437        | 1.8                      | -50.9                   | -18.3                  | 45.9                    | -35.2                  | 60.3                     |
| 173        | ZINC000065463577        | 1.8                      | -46.6                   | -32.2                  | 55.7                    | -31.1                  | 56.0                     |
| 174        | ZINC000072277544        | 1.8                      | -45.7                   | -15.0                  | 37.7                    | -29.9                  | 54.8                     |
| 175        | ZINC000072300733        | 1.9                      | -51.3                   | -12.8                  | 40.6                    | -33.3                  | 58.7                     |



| #   | ZINC ID          | $\Delta G_{\text{bind}}$ | $\Delta E_{\text{vdW}}$ | $\Delta E_{\text{el}}$ | $\Delta G_{\text{pol}}$ | $\Delta G_{\text{np}}$ | $\Delta G_{\text{disp}}$ |
|-----|------------------|--------------------------|-------------------------|------------------------|-------------------------|------------------------|--------------------------|
| 176 | ZINC000052955795 | 2.0                      | -46.7                   | -27.1                  | 49.1                    | -33.1                  | 59.8                     |
| 177 | ZINC000012550491 | 2.2                      | -46.4                   | -23.5                  | 47.0                    | -31.1                  | 56.3                     |
| 178 | ZINC000003852421 | 2.2                      | -44.3                   | -12.3                  | 35.0                    | -28.4                  | 52.1                     |
| 179 | ZINC000001810957 | 2.2                      | -45.8                   | -17.2                  | 41.9                    | -31.0                  | 54.3                     |
| 180 | ZINC000091304527 | 2.2                      | -50.9                   | -14.0                  | 40.6                    | -34.3                  | 60.8                     |
| 181 | ZINC000040386093 | 2.3                      | -45.0                   | -13.8                  | 38.2                    | -31.4                  | 54.3                     |
| 182 | ZINC000072290753 | 2.3                      | -52.3                   | -26.0                  | 53.7                    | -32.4                  | 59.4                     |
| 183 | ZINC000057771728 | 2.3                      | -48.2                   | -24.0                  | 49.7                    | -33.0                  | 57.7                     |
| 184 | ZINC000005303591 | 2.5                      | -44.2                   | -20.2                  | 42.9                    | -31.2                  | 55.1                     |
| 185 | ZINC000034895992 | 2.5                      | -49.7                   | -29.9                  | 56.3                    | -35.0                  | 60.9                     |
| 186 | ZINC000072290711 | 2.5                      | -46.7                   | -16.6                  | 39.1                    | -29.4                  | 56.2                     |
| 187 | ZINC000040386098 | 2.6                      | -42.7                   | -13.8                  | 36.9                    | -30.0                  | 52.0                     |
| 188 | ZINC000014741626 | 2.6                      | -49.6                   | -6.8                   | 33.0                    | -33.4                  | 59.5                     |
| 189 | ZINC000306138347 | 2.7                      | -49.7                   | -17.2                  | 44.5                    | -32.0                  | 57.1                     |
| 190 | ZINC000257256038 | 2.7                      | -45.9                   | -24.2                  | 47.3                    | -32.2                  | 57.7                     |
| 191 | ZINC000013691849 | 2.8                      | -44.2                   | -33.9                  | 56.2                    | -31.2                  | 55.9                     |
| 192 | ZINC000079001413 | 2.8                      | -52.9                   | -9.1                   | 38.0                    | -33.8                  | 60.6                     |
| 193 | ZINC000002922856 | 2.8                      | -52.4                   | -15.5                  | 46.1                    | -33.4                  | 58.1                     |
| 194 | ZINC000023764785 | 2.8                      | -45.9                   | -15.6                  | 40.0                    | -32.1                  | 56.5                     |
| 195 | ZINC000013692677 | 3.2                      | -51.9                   | -30.8                  | 59.8                    | -34.6                  | 60.6                     |
| 196 | ZINC000029134571 | 3.2                      | -52.1                   | -19.6                  | 50.3                    | -33.8                  | 58.4                     |
| 197 | ZINC000040385901 | 3.2                      | -41.1                   | -13.0                  | 36.0                    | -28.8                  | 50.1                     |
| 198 | ZINC000096122792 | 3.3                      | -48.6                   | -9.2                   | 37.6                    | -31.0                  | 54.4                     |
| 199 | ZINC000008776545 | 3.3                      | -47.3                   | -15.4                  | 40.4                    | -31.0                  | 56.6                     |
| 200 | ZINC000072290626 | 3.3                      | -48.7                   | -19.4                  | 45.1                    | -31.5                  | 57.8                     |
| 201 | ZINC000096251709 | 3.4                      | -48.0                   | -18.9                  | 44.7                    | -32.0                  | 57.6                     |
| 202 | ZINC000028790813 | 3.4                      | -51.7                   | -24.1                  | 52.5                    | -33.4                  | 60.1                     |
| 203 | ZINC000096038482 | 3.4                      | -39.5                   | -24.6                  | 43.4                    | -29.8                  | 53.9                     |
| 204 | ZINC000044908085 | 3.4                      | -51.1                   | -21.0                  | 48.6                    | -31.9                  | 58.9                     |
| 205 | ZINC000170800517 | 3.5                      | -49.4                   | -18.5                  | 44.9                    | -34.0                  | 60.6                     |
| 206 | ZINC000091664087 | 3.6                      | -54.4                   | -7.8                   | 39.1                    | -34.2                  | 60.9                     |
| 207 | ZINC000085879141 | 3.6                      | -41.7                   | -10.6                  | 32.2                    | -29.1                  | 52.8                     |
| 208 | ZINC000257257831 | 3.7                      | -45.8                   | -12.3                  | 38.3                    | -30.3                  | 53.8                     |
| 209 | ZINC000072437791 | 3.8                      | -46.5                   | -12.5                  | 38.1                    | -30.8                  | 55.4                     |
| 210 | ZINC000095402766 | 3.9                      | -44.9                   | -16.8                  | 40.7                    | -32.2                  | 57.0                     |
| 211 | ZINC000096837115 | 3.9                      | -45.6                   | -27.4                  | 50.7                    | -31.5                  | 57.8                     |
| 212 | ZINC000003327891 | 4.0                      | -45.9                   | -11.8                  | 36.6                    | -31.1                  | 56.3                     |
| 213 | ZINC000019973951 | 4.1                      | -40.3                   | -29.4                  | 48.2                    | -28.2                  | 53.8                     |
| 214 | ZINC000006782318 | 4.1                      | -47.7                   | -18.1                  | 43.9                    | -31.1                  | 57.1                     |
| 215 | ZINC000096080454 | 4.2                      | -44.4                   | -19.6                  | 44.1                    | -29.5                  | 53.6                     |
| 216 | ZINC000005088834 | 4.3                      | -42.9                   | -7.6                   | 31.3                    | -30.3                  | 53.7                     |
| 217 | ZINC000245171655 | 4.3                      | -48.7                   | -10.2                  | 39.1                    | -32.6                  | 56.7                     |
| 218 | ZINC000097050589 | 4.4                      | -48.8                   | -13.2                  | 42.6                    | -32.2                  | 55.9                     |
| 219 | ZINC000012508838 | 4.4                      | -49.0                   | -24.8                  | 54.5                    | -33.3                  | 57.0                     |
| 220 | ZINC000065167646 | 4.4                      | -47.8                   | -21.8                  | 49.2                    | -32.1                  | 56.9                     |
| 221 | ZINC000253407066 | 4.5                      | -46.7                   | -13.8                  | 41.2                    | -31.7                  | 55.4                     |

| #   | ZINC ID          | $\Delta G_{\text{bind}}$ | $\Delta E_{\text{vdW}}$ | $\Delta E_{\text{el}}$ | $\Delta G_{\text{pol}}$ | $\Delta G_{\text{np}}$ | $\Delta G_{\text{disp}}$ |
|-----|------------------|--------------------------|-------------------------|------------------------|-------------------------|------------------------|--------------------------|
| 222 | ZINC000071746202 | 4.6                      | -47.6                   | -15.1                  | 39.6                    | -31.9                  | 59.6                     |
| 223 | ZINC000257270100 | 4.6                      | -46.1                   | -10.6                  | 37.3                    | -31.8                  | 55.8                     |
| 224 | ZINC000071282106 | 4.7                      | -47.7                   | -15.4                  | 40.9                    | -33.0                  | 59.9                     |
| 225 | ZINC000008771448 | 4.7                      | -48.5                   | -23.5                  | 51.6                    | -32.9                  | 58.1                     |
| 226 | ZINC000000489138 | 4.8                      | -50.3                   | -20.6                  | 51.6                    | -32.3                  | 56.3                     |
| 227 | ZINC000153353600 | 4.9                      | -46.2                   | -8.9                   | 35.1                    | -31.7                  | 56.7                     |
| 228 | ZINC000003875380 | 4.9                      | -46.6                   | -15.5                  | 39.6                    | -28.6                  | 56.1                     |
| 229 | ZINC000065591272 | 5.3                      | -44.9                   | -9.7                   | 35.0                    | -31.5                  | 56.3                     |
| 230 | ZINC000019328346 | 5.4                      | -46.7                   | -22.0                  | 48.9                    | -31.6                  | 56.9                     |
| 231 | ZINC000072896859 | 5.4                      | -48.3                   | -6.8                   | 34.3                    | -32.6                  | 58.9                     |
| 232 | ZINC000057511709 | 5.4                      | -45.5                   | -22.5                  | 49.1                    | -30.8                  | 55.1                     |
| 233 | ZINC000034407910 | 5.5                      | -38.4                   | -15.1                  | 36.8                    | -26.9                  | 49.1                     |
| 234 | ZINC000062639858 | 5.6                      | -52.0                   | -3.0                   | 33.8                    | -34.7                  | 61.5                     |
| 235 | ZINC000299793701 | 5.8                      | -42.4                   | -24.9                  | 47.1                    | -30.1                  | 56.1                     |
| 236 | ZINC000091321614 | 5.9                      | -49.4                   | -18.7                  | 47.5                    | -33.2                  | 59.7                     |
| 237 | ZINC000030875068 | 6.0                      | -45.9                   | -10.0                  | 37.4                    | -30.4                  | 54.8                     |
| 238 | ZINC000071497775 | 6.0                      | -51.3                   | -25.4                  | 56.4                    | -34.5                  | 60.9                     |
| 239 | ZINC000072807915 | 6.0                      | -50.6                   | -7.2                   | 36.8                    | -33.9                  | 60.9                     |
| 240 | ZINC000012407997 | 6.3                      | -48.0                   | -11.5                  | 40.0                    | -33.1                  | 59.0                     |
| 241 | ZINC000006887927 | 6.3                      | -48.4                   | -23.8                  | 52.3                    | -33.9                  | 60.0                     |
| 242 | ZINC000584897275 | 6.4                      | -44.7                   | -36.7                  | 60.9                    | -32.1                  | 59.0                     |
| 243 | ZINC000253473237 | 6.5                      | -44.9                   | -8.3                   | 35.6                    | -31.5                  | 55.7                     |
| 244 | ZINC000096069207 | 6.6                      | -52.2                   | -20.5                  | 51.6                    | -33.3                  | 60.9                     |
| 245 | ZINC000027755553 | 6.7                      | -46.7                   | -15.5                  | 44.1                    | -31.2                  | 56.1                     |
| 246 | ZINC000048249797 | 6.7                      | -50.8                   | -10.3                  | 42.1                    | -33.8                  | 59.5                     |
| 247 | ZINC000330033487 | 6.8                      | -50.1                   | -15.9                  | 47.2                    | -33.3                  | 58.9                     |
| 248 | ZINC000002390471 | 6.8                      | -43.9                   | -12.4                  | 37.7                    | -29.4                  | 54.8                     |
| 249 | ZINC000084563579 | 6.9                      | -45.4                   | -20.3                  | 49.7                    | -33.4                  | 56.3                     |
| 250 | ZINC000047209496 | 6.9                      | -44.4                   | -13.3                  | 40.4                    | -31.5                  | 55.7                     |
| 251 | ZINC000255187536 | 6.9                      | -42.3                   | -21.3                  | 46.6                    | -29.4                  | 53.4                     |
| 252 | ZINC000072235028 | 7.0                      | -52.8                   | -12.4                  | 45.9                    | -34.1                  | 60.4                     |
| 253 | ZINC000004722011 | 7.2                      | -44.0                   | -7.1                   | 33.8                    | -29.5                  | 54.0                     |
| 254 | ZINC000096069697 | 7.7                      | -45.5                   | -9.3                   | 36.2                    | -30.7                  | 56.9                     |
| 255 | ZINC000005348603 | 7.8                      | -46.3                   | -8.7                   | 39.0                    | -31.3                  | 55.1                     |
| 256 | ZINC000239762559 | 8.1                      | -48.8                   | -21.2                  | 52.5                    | -32.5                  | 58.1                     |
| 257 | ZINC000022067509 | 8.1                      | -49.1                   | -30.2                  | 62.4                    | -34.0                  | 59.0                     |
| 258 | ZINC000018240833 | 8.1                      | -47.5                   | -37.8                  | 67.0                    | -32.9                  | 59.2                     |
| 259 | ZINC000192929211 | 8.4                      | -44.2                   | -24.0                  | 52.8                    | -31.7                  | 55.6                     |
| 260 | ZINC000040266307 | 8.7                      | -44.5                   | -22.2                  | 50.7                    | -31.2                  | 55.9                     |
| 261 | ZINC000077522487 | 8.8                      | -48.6                   | -28.5                  | 58.3                    | -33.0                  | 60.4                     |
| 262 | ZINC000017888288 | 9.0                      | -44.1                   | -16.9                  | 45.5                    | -28.4                  | 52.9                     |
| 263 | ZINC000170016387 | 9.1                      | -42.6                   | -20.3                  | 47.9                    | -31.4                  | 55.6                     |
| 264 | ZINC000068269627 | 9.3                      | -50.4                   | -27.6                  | 60.1                    | -33.1                  | 60.3                     |
| 265 | ZINC000004732939 | 9.3                      | -43.8                   | -12.5                  | 42.8                    | -31.5                  | 54.4                     |
| 266 | ZINC000006556210 | 9.3                      | -41.4                   | -11.3                  | 39.4                    | -28.3                  | 50.9                     |
| 267 | ZINC000136345745 | 9.4                      | -51.8                   | -19.5                  | 55.0                    | -33.3                  | 59.0                     |

| #   | ZINC ID          | $\Delta G_{\text{bind}}$ | $\Delta E_{\text{vdW}}$ | $\Delta E_{\text{el}}$ | $\Delta G_{\text{pol}}$ | $\Delta G_{\text{np}}$ | $\Delta G_{\text{disp}}$ |
|-----|------------------|--------------------------|-------------------------|------------------------|-------------------------|------------------------|--------------------------|
| 268 | ZINC000000079035 | 9.6                      | -47.2                   | -19.1                  | 50.2                    | -32.7                  | 58.5                     |
| 269 | ZINC000091487017 | 9.7                      | -49.3                   | -11.4                  | 43.6                    | -33.4                  | 60.3                     |
| 270 | ZINC000238831563 | 9.8                      | -47.8                   | -11.4                  | 45.2                    | -31.1                  | 55.0                     |
| 271 | ZINC000002837442 | 9.8                      | -42.9                   | -16.1                  | 43.4                    | -30.1                  | 55.5                     |
| 272 | ZINC000237740654 | 10.0                     | -45.0                   | -3.6                   | 32.9                    | -31.7                  | 57.5                     |
| 273 | ZINC000000353960 | 10.1                     | -35.6                   | -38.0                  | 65.4                    | -27.4                  | 45.6                     |
| 274 | ZINC000253433605 | 10.1                     | -47.3                   | -14.5                  | 47.9                    | -32.7                  | 56.6                     |
| 275 | ZINC000008609997 | 10.1                     | -50.6                   | -13.5                  | 48.4                    | -32.9                  | 58.7                     |
| 276 | ZINC000000201272 | 10.3                     | -46.5                   | -7.2                   | 39.9                    | -30.2                  | 54.3                     |
| 277 | ZINC000061067795 | 10.6                     | -48.3                   | -13.8                  | 47.4                    | -32.7                  | 58.0                     |
| 278 | ZINC000004495846 | 10.7                     | -46.3                   | -26.6                  | 56.9                    | -31.0                  | 57.6                     |
| 279 | ZINC000107713021 | 11.0                     | -44.7                   | -2.8                   | 32.5                    | -31.7                  | 57.7                     |
| 280 | ZINC000019796838 | 11.1                     | -46.3                   | -11.2                  | 42.9                    | -30.7                  | 56.3                     |
| 281 | ZINC000089857747 | 11.1                     | -50.7                   | -7.6                   | 44.1                    | -32.6                  | 57.9                     |
| 282 | ZINC000001620500 | 11.5                     | -42.1                   | -26.7                  | 56.1                    | -29.8                  | 53.9                     |
| 283 | ZINC000009318781 | 11.6                     | -46.3                   | -25.9                  | 60.2                    | -30.0                  | 53.6                     |
| 284 | ZINC000268943077 | 11.6                     | -41.8                   | 6.5                    | 22.8                    | -29.3                  | 53.4                     |
| 285 | ZINC000012557330 | 12.3                     | -43.0                   | -10.6                  | 40.7                    | -27.7                  | 52.8                     |
| 286 | ZINC000006918427 | 12.3                     | -45.0                   | -13.2                  | 45.8                    | -30.0                  | 54.7                     |
| 287 | ZINC000012142779 | 12.9                     | -50.2                   | -15.4                  | 52.2                    | -34.2                  | 60.5                     |
| 288 | ZINC000215185695 | 13.1                     | -47.4                   | -16.7                  | 51.7                    | -34.3                  | 59.9                     |
| 289 | ZINC000072432742 | 13.3                     | -49.1                   | 1.8                    | 35.2                    | -33.3                  | 58.6                     |
| 290 | ZINC000005244779 | 13.5                     | -49.8                   | -9.7                   | 47.4                    | -33.1                  | 58.6                     |
| 291 | ZINC000284798034 | 13.6                     | -50.9                   | -22.8                  | 62.0                    | -32.4                  | 57.7                     |
| 292 | ZINC000012239509 | 13.9                     | -50.5                   | -7.5                   | 45.9                    | -33.8                  | 59.8                     |
| 293 | ZINC000012122382 | 14.2                     | -42.6                   | -9.7                   | 40.2                    | -30.1                  | 56.5                     |
| 294 | ZINC000013278475 | 14.4                     | -48.6                   | -19.5                  | 59.8                    | -32.5                  | 55.2                     |
| 295 | ZINC000575617533 | 14.4                     | -44.8                   | -10.3                  | 42.4                    | -31.4                  | 58.4                     |
| 296 | ZINC000004807849 | 14.7                     | -36.5                   | -47.4                  | 74.5                    | -26.7                  | 50.9                     |
| 297 | ZINC000237955843 | 16.3                     | -40.6                   | -42.8                  | 73.6                    | -30.5                  | 56.6                     |
| 298 | ZINC000018177963 | 16.7                     | -32.7                   | -55.9                  | 82.0                    | -25.9                  | 49.2                     |
| 299 | ZINC000006576136 | 17.2                     | -34.5                   | -6.9                   | 37.6                    | -26.5                  | 47.5                     |
| 300 | ZINC000069895275 | 18.4                     | -37.0                   | -10.2                  | 43.9                    | -27.3                  | 49.0                     |
| 301 | ZINC000004806959 | 18.7                     | -39.4                   | -29.2                  | 63.2                    | -29.0                  | 53.1                     |
| 302 | ZINC000237699092 | 21.8                     | -40.8                   | -8.7                   | 45.0                    | -29.6                  | 55.9                     |
| 303 | ZINC000008848147 | 21.9                     | -38.7                   | -0.8                   | 39.0                    | -27.4                  | 49.9                     |
| 304 | ZINC000003947438 | 22.2                     | -41.0                   | -21.6                  | 59.8                    | -29.4                  | 54.5                     |
| 305 | ZINC000096198984 | 24.0                     | -45.9                   | -8.9                   | 52.1                    | -32.0                  | 58.7                     |

**Table S4.** Energy decomposition of the MM/PBSA results for the 305 compounds using the *PB-4* parameter set (for more details see the Methods section). All energy terms are given in kcal/mol with their standard deviation (*std*) and are sorted by the binding free energy ( $\Delta G_{\text{bind}}$ ) followed by the molecular mechanics van der Waals and electrostatic interactions terms ( $\Delta E_{\text{vdW}}$  and  $\Delta E_{\text{el}}$ ) and the polar and non-polar contributions to the solvation free energy ( $\Delta G_{\text{pol}}$  and  $\Delta G_{\text{np}}$ ). Compounds marked in boldface were finally selected for experimental screening.

| #  | ZINC ID                 | $\Delta G_{\text{bind}}$ | <i>std</i> | $\Delta E_{\text{vdW}}$ | <i>std</i> | $\Delta E_{\text{el}}$ | <i>std</i> | $\Delta G_{\text{pol}}$ | <i>std</i> | $\Delta G_{\text{np}}$ | <i>std</i> |
|----|-------------------------|--------------------------|------------|-------------------------|------------|------------------------|------------|-------------------------|------------|------------------------|------------|
| 1  | <b>ZINC000035869910</b> | <b>-38.7</b>             | <b>4.4</b> | <b>-54.6</b>            | <b>2.6</b> | <b>-35.5</b>           | <b>5.1</b> | <b>57.7</b>             | <b>3.7</b> | <b>-6.3</b>            | <b>0.1</b> |
| 2  | <b>ZINC000003463362</b> | <b>-37.7</b>             | <b>3.3</b> | <b>-50.0</b>            | <b>2.8</b> | <b>-30.9</b>           | <b>4.2</b> | <b>49.5</b>             | <b>4.1</b> | <b>-6.3</b>            | <b>0.2</b> |
| 3  | <b>ZINC000091270543</b> | <b>-36.9</b>             | <b>3.4</b> | <b>-53.6</b>            | <b>3.0</b> | <b>-23.0</b>           | <b>3.8</b> | <b>46.0</b>             | <b>3.0</b> | <b>-6.2</b>            | <b>0.1</b> |
| 4  | <b>ZINC000084578820</b> | <b>-36.3</b>             | <b>4.2</b> | <b>-47.8</b>            | <b>2.6</b> | <b>-35.8</b>           | <b>7.0</b> | <b>53.2</b>             | <b>4.0</b> | <b>-5.8</b>            | <b>0.1</b> |
| 5  | ZINC000257317306        | -36.2                    | 4.5        | -50.1                   | 2.8        | -41.5                  | 3.3        | 62.1                    | 4.2        | -6.7                   | 0.1        |
| 6  | <b>ZINC000084598177</b> | <b>-36.2</b>             | <b>3.5</b> | <b>-49.0</b>            | <b>2.5</b> | <b>-29.0</b>           | <b>3.2</b> | <b>47.6</b>             | <b>3.7</b> | <b>-5.8</b>            | <b>0.1</b> |
| 7  | <b>ZINC000005360885</b> | <b>-36.0</b>             | <b>4.2</b> | <b>-48.1</b>            | <b>2.7</b> | <b>-36.1</b>           | <b>4.9</b> | <b>53.9</b>             | <b>2.7</b> | <b>-5.7</b>            | <b>0.1</b> |
| 8  | <b>ZINC000095415912</b> | <b>-35.4</b>             | <b>3.9</b> | <b>-53.2</b>            | <b>2.7</b> | <b>-28.4</b>           | <b>4.2</b> | <b>52.1</b>             | <b>3.0</b> | <b>-6.0</b>            | <b>0.1</b> |
| 9  | <b>ZINC000057563200</b> | <b>-35.4</b>             | <b>4.4</b> | <b>-49.9</b>            | <b>2.7</b> | <b>-17.6</b>           | <b>4.6</b> | <b>38.4</b>             | <b>3.2</b> | <b>-6.4</b>            | <b>0.1</b> |
| 10 | <b>ZINC000022191233</b> | <b>-35.1</b>             | <b>3.5</b> | <b>-53.6</b>            | <b>2.9</b> | <b>-31.4</b>           | <b>3.7</b> | <b>56.0</b>             | <b>3.1</b> | <b>-6.1</b>            | <b>0.1</b> |
| 11 | ZINC000092065700        | -34.4                    | 3.7        | -52.6                   | 2.5        | -19.7                  | 2.9        | 44.5                    | 3.6        | -6.5                   | 0.1        |
| 12 | <b>ZINC000079491038</b> | <b>-34.4</b>             | <b>4.3</b> | <b>-51.3</b>            | <b>2.7</b> | <b>-28.2</b>           | <b>5.1</b> | <b>51.2</b>             | <b>4.7</b> | <b>-6.1</b>            | <b>0.2</b> |
| 13 | <b>ZINC000010256259</b> | <b>-34.3</b>             | <b>3.8</b> | <b>-52.7</b>            | <b>2.7</b> | <b>-42.1</b>           | <b>3.7</b> | <b>66.5</b>             | <b>3.7</b> | <b>-6.0</b>            | <b>0.1</b> |
| 14 | <b>ZINC000069562405</b> | <b>-33.7</b>             | <b>3.1</b> | <b>-47.4</b>            | <b>2.6</b> | <b>-27.1</b>           | <b>2.9</b> | <b>46.6</b>             | <b>2.4</b> | <b>-5.8</b>            | <b>0.1</b> |
| 15 | <b>ZINC000000333210</b> | <b>-33.6</b>             | <b>3.2</b> | <b>-50.6</b>            | <b>3.0</b> | <b>-32.6</b>           | <b>3.7</b> | <b>55.3</b>             | <b>3.0</b> | <b>-5.8</b>            | <b>0.1</b> |
| 16 | ZINC000084686490        | -33.6                    | 3.6        | -46.1                   | 2.4        | -33.4                  | 3.0        | 51.8                    | 3.1        | -6.0                   | 0.1        |
| 17 | <b>ZINC000223692657</b> | <b>-33.5</b>             | <b>3.3</b> | <b>-50.8</b>            | <b>2.6</b> | <b>-28.2</b>           | <b>3.9</b> | <b>51.2</b>             | <b>2.7</b> | <b>-5.7</b>            | <b>0.1</b> |
| 18 | <b>ZINC000018148904</b> | <b>-33.4</b>             | <b>3.5</b> | <b>-50.1</b>            | <b>2.6</b> | <b>-32.4</b>           | <b>3.5</b> | <b>54.7</b>             | <b>2.7</b> | <b>-5.7</b>            | <b>0.1</b> |
| 19 | ZINC000096199614        | -33.3                    | 3.7        | -51.3                   | 2.5        | -28.0                  | 3.7        | 51.5                    | 2.7        | -5.5                   | 0.1        |
| 20 | <b>ZINC000069737923</b> | <b>-33.2</b>             | <b>3.3</b> | <b>-46.3</b>            | <b>2.3</b> | <b>-30.1</b>           | <b>4.0</b> | <b>49.5</b>             | <b>3.1</b> | <b>-6.3</b>            | <b>0.1</b> |
| 21 | ZINC000096058349        | -33.1                    | 3.8        | -54.1                   | 2.4        | -18.0                  | 2.3        | 44.9                    | 2.7        | -5.8                   | 0.1        |
| 22 | <b>ZINC000043550595</b> | <b>-33.1</b>             | <b>4.0</b> | <b>-48.3</b>            | <b>2.5</b> | <b>-29.1</b>           | <b>3.4</b> | <b>50.3</b>             | <b>3.0</b> | <b>-6.1</b>            | <b>0.1</b> |
| 23 | ZINC000092078469        | -33.0                    | 3.9        | -45.0                   | 3.2        | -24.1                  | 3.6        | 42.2                    | 3.6        | -6.2                   | 0.2        |
| 24 | ZINC000092022499        | -33.0                    | 3.5        | -53.4                   | 2.6        | -23.3                  | 2.6        | 50.0                    | 3.4        | -6.3                   | 0.1        |
| 25 | <b>ZINC000071915224</b> | <b>-32.9</b>             | <b>3.7</b> | <b>-49.3</b>            | <b>2.3</b> | <b>-26.5</b>           | <b>3.5</b> | <b>48.7</b>             | <b>3.4</b> | <b>-5.9</b>            | <b>0.1</b> |
| 26 | ZINC000095950700        | -32.9                    | 3.2        | -48.8                   | 2.7        | -19.6                  | 2.1        | 41.3                    | 2.9        | -5.8                   | 0.1        |
| 27 | ZINC000100193536        | -32.8                    | 3.6        | -48.7                   | 2.9        | -15.8                  | 2.9        | 37.6                    | 2.7        | -5.9                   | 0.1        |
| 28 | ZINC000091270544        | -32.7                    | 3.8        | -52.4                   | 2.7        | -22.2                  | 3.8        | 48.2                    | 3.5        | -6.3                   | 0.1        |
| 29 | <b>ZINC000015078577</b> | <b>-32.6</b>             | <b>3.8</b> | <b>-49.4</b>            | <b>2.8</b> | <b>-29.5</b>           | <b>4.6</b> | <b>52.5</b>             | <b>4.6</b> | <b>-6.2</b>            | <b>0.1</b> |
| 30 | <b>ZINC000051467674</b> | <b>-32.6</b>             | <b>3.6</b> | <b>-46.6</b>            | <b>2.7</b> | <b>-40.1</b>           | <b>3.8</b> | <b>60.0</b>             | <b>3.3</b> | <b>-5.9</b>            | <b>0.1</b> |
| 31 | <b>ZINC000095410774</b> | <b>-32.5</b>             | <b>3.2</b> | <b>-50.5</b>            | <b>2.4</b> | <b>-24.2</b>           | <b>3.1</b> | <b>47.7</b>             | <b>2.7</b> | <b>-5.5</b>            | <b>0.1</b> |
| 32 | <b>ZINC000240454699</b> | <b>-32.2</b>             | <b>3.2</b> | <b>-42.5</b>            | <b>2.5</b> | <b>-25.1</b>           | <b>4.6</b> | <b>41.3</b>             | <b>3.5</b> | <b>-5.9</b>            | <b>0.1</b> |
| 33 | ZINC000216315534        | -32.1                    | 2.7        | -41.9                   | 2.5        | -28.6                  | 4.7        | 44.1                    | 3.7        | -5.7                   | 0.1        |
| 34 | ZINC000089827813        | -32.1                    | 4.1        | -46.6                   | 3.2        | -29.5                  | 4.7        | 49.7                    | 2.6        | -5.6                   | 0.1        |
| 35 | ZINC000225746732        | -32.0                    | 2.6        | -47.5                   | 2.3        | -21.3                  | 2.3        | 42.2                    | 2.3        | -5.5                   | 0.1        |
| 36 | ZINC000004722089        | -32.0                    | 3.1        | -48.1                   | 2.5        | -14.7                  | 2.7        | 36.5                    | 2.6        | -5.7                   | 0.1        |
| 37 | ZINC000195547314        | -31.9                    | 3.2        | -50.9                   | 2.8        | -14.0                  | 3.2        | 39.2                    | 2.7        | -6.1                   | 0.1        |
| 38 | ZINC000334160460        | -31.8                    | 3.3        | -49.1                   | 2.5        | -22.9                  | 2.9        | 46.2                    | 2.3        | -5.9                   | 0.1        |

| #         | ZINC ID                 | $\Delta G_{\text{bind}}$ | <i>std</i> | $\Delta E_{\text{vdW}}$ | <i>std</i> | $\Delta E_{\text{el}}$ | <i>std</i> | $\Delta G_{\text{pol}}$ | <i>std</i> | $\Delta G_{\text{np}}$ | <i>std</i> |
|-----------|-------------------------|--------------------------|------------|-------------------------|------------|------------------------|------------|-------------------------|------------|------------------------|------------|
| 39        | ZINC000257299555        | -31.5                    | 3.6        | -46.7                   | 3.1        | -38.1                  | 4.3        | 58.9                    | 3.7        | -5.6                   | 0.1        |
| 40        | ZINC000075530913        | -31.5                    | 3.4        | -49.2                   | 2.3        | -20.1                  | 2.3        | 43.9                    | 2.6        | -6.1                   | 0.1        |
| <b>41</b> | <b>ZINC000244816835</b> | <b>-31.5</b>             | <b>3.3</b> | <b>-43.8</b>            | <b>3.0</b> | <b>-34.4</b>           | <b>3.6</b> | <b>52.7</b>             | <b>2.9</b> | <b>-6.0</b>            | <b>0.2</b> |
| 42        | ZINC000057731402        | -31.4                    | 3.6        | -51.2                   | 2.6        | -25.6                  | 3.7        | 51.4                    | 3.0        | -6.1                   | 0.1        |
| 43        | ZINC000012888207        | -31.4                    | 2.6        | -40.8                   | 2.2        | -27.7                  | 3.4        | 42.3                    | 2.8        | -5.2                   | 0.1        |
| 44        | ZINC000091486946        | -31.3                    | 3.8        | -52.4                   | 2.6        | -21.0                  | 2.8        | 48.4                    | 4.0        | -6.3                   | 0.1        |
| 45        | ZINC000229623928        | -31.2                    | 4.0        | -50.6                   | 2.5        | -33.6                  | 3.7        | 59.2                    | 3.9        | -6.1                   | 0.1        |
| <b>46</b> | <b>ZINC000025032259</b> | <b>-31.0</b>             | <b>4.1</b> | <b>-54.4</b>            | <b>2.7</b> | <b>-22.2</b>           | <b>3.2</b> | <b>52.2</b>             | <b>4.5</b> | <b>-6.7</b>            | <b>0.1</b> |
| 47        | ZINC000306141880        | -31.0                    | 3.2        | -46.5                   | 2.8        | -29.4                  | 4.2        | 50.8                    | 2.9        | -6.0                   | 0.1        |
| 48        | ZINC000021835963        | -31.0                    | 3.2        | -48.7                   | 2.2        | -25.8                  | 3.3        | 49.5                    | 2.8        | -6.0                   | 0.1        |
| 49        | ZINC000100191495        | -31.0                    | 3.6        | -46.6                   | 2.6        | -14.5                  | 2.6        | 35.6                    | 2.8        | -5.4                   | 0.1        |
| <b>50</b> | <b>ZINC000002216953</b> | <b>-31.0</b>             | <b>3.3</b> | <b>-48.7</b>            | <b>2.4</b> | <b>-24.8</b>           | <b>3.2</b> | <b>48.5</b>             | <b>3.0</b> | <b>-6.0</b>            | <b>0.1</b> |
| 51        | ZINC000022241454        | -31.0                    | 3.6        | -39.1                   | 2.9        | -39.2                  | 6.6        | 52.9                    | 6.4        | -5.6                   | 0.1        |
| 52        | ZINC000100193430        | -30.9                    | 2.9        | -47.9                   | 2.4        | -14.3                  | 2.6        | 36.7                    | 2.6        | -5.4                   | 0.1        |
| <b>53</b> | <b>ZINC000004998502</b> | <b>-30.8</b>             | <b>4.8</b> | <b>-53.5</b>            | <b>3.3</b> | <b>-39.4</b>           | <b>4.2</b> | <b>68.1</b>             | <b>4.5</b> | <b>-6.1</b>            | <b>0.1</b> |
| 54        | ZINC000154455008        | -30.6                    | 3.7        | -44.9                   | 2.8        | -15.4                  | 6.2        | 35.8                    | 4.2        | -6.0                   | 0.1        |
| 55        | ZINC000008316344        | -30.5                    | 3.9        | -51.0                   | 2.4        | -5.6                   | 2.6        | 32.0                    | 4.0        | -5.9                   | 0.1        |
| 56        | ZINC000095469884        | -30.5                    | 3.1        | -40.0                   | 2.8        | -35.7                  | 3.7        | 50.4                    | 2.5        | -5.2                   | 0.1        |
| 57        | ZINC000040473994        | -30.5                    | 3.1        | -49.6                   | 2.8        | -26.5                  | 4.0        | 51.3                    | 2.7        | -5.8                   | 0.1        |
| 58        | ZINC000044874685        | -30.4                    | 4.1        | -44.2                   | 2.8        | -24.3                  | 4.6        | 44.0                    | 3.9        | -5.9                   | 0.1        |
| <b>59</b> | <b>ZINC000091486133</b> | <b>-30.3</b>             | <b>3.5</b> | <b>-52.7</b>            | <b>2.9</b> | <b>-25.7</b>           | <b>3.2</b> | <b>54.4</b>             | <b>3.2</b> | <b>-6.2</b>            | <b>0.1</b> |
| 60        | ZINC000194368147        | -30.3                    | 3.4        | -48.3                   | 2.8        | -31.3                  | 3.5        | 54.9                    | 2.5        | -5.6                   | 0.1        |
| 61        | ZINC000022549345        | -30.2                    | 3.5        | -53.9                   | 2.1        | -16.6                  | 3.8        | 46.7                    | 5.3        | -6.5                   | 0.1        |
| 62        | ZINC000096238948        | -30.1                    | 4.0        | -53.8                   | 2.7        | -14.2                  | 5.3        | 44.2                    | 6.2        | -6.3                   | 0.1        |
| 63        | ZINC000091768990        | -30.1                    | 3.7        | -52.4                   | 2.8        | -14.9                  | 2.6        | 43.1                    | 2.6        | -5.8                   | 0.1        |
| 64        | ZINC000069846908        | -29.9                    | 5.0        | -50.0                   | 3.0        | -33.3                  | 7.7        | 59.4                    | 4.2        | -6.0                   | 0.1        |
| 65        | ZINC000011781217        | -29.8                    | 3.6        | -52.0                   | 2.2        | -13.7                  | 2.4        | 42.4                    | 3.6        | -6.5                   | 0.1        |
| 66        | ZINC000257206611        | -29.8                    | 5.2        | -55.3                   | 3.1        | -11.5                  | 5.7        | 43.2                    | 7.0        | -6.2                   | 0.1        |
| 67        | ZINC000097201269        | -29.7                    | 5.8        | -49.4                   | 2.6        | -17.3                  | 4.2        | 43.5                    | 5.6        | -6.4                   | 0.1        |
| 68        | ZINC000230113696        | -29.6                    | 3.9        | -52.9                   | 2.8        | -23.6                  | 4.3        | 52.9                    | 4.2        | -6.1                   | 0.1        |
| 69        | ZINC000012142783        | -29.6                    | 5.4        | -51.0                   | 2.5        | -22.0                  | 5.0        | 49.8                    | 5.8        | -6.4                   | 0.1        |
| 70        | ZINC000575618196        | -29.6                    | 3.9        | -54.5                   | 2.7        | -27.3                  | 3.9        | 58.5                    | 3.6        | -6.2                   | 0.1        |
| 71        | ZINC000257222272        | -29.5                    | 3.1        | -51.4                   | 2.2        | -7.4                   | 2.0        | 35.6                    | 2.8        | -6.3                   | 0.1        |
| <b>72</b> | <b>ZINC000044919578</b> | <b>-29.5</b>             | <b>2.9</b> | <b>-43.0</b>            | <b>2.1</b> | <b>-29.3</b>           | <b>3.4</b> | <b>48.4</b>             | <b>3.1</b> | <b>-5.6</b>            | <b>0.1</b> |
| 73        | ZINC000257211885        | -29.4                    | 5.5        | -50.3                   | 3.9        | -20.9                  | 3.8        | 47.7                    | 4.0        | -5.9                   | 0.1        |
| 74        | ZINC000014791001        | -29.4                    | 3.4        | -47.0                   | 2.3        | -21.6                  | 3.5        | 44.7                    | 3.0        | -5.5                   | 0.1        |
| <b>75</b> | <b>ZINC000008913866</b> | <b>-29.3</b>             | <b>4.4</b> | <b>-50.7</b>            | <b>2.5</b> | <b>-29.7</b>           | <b>6.1</b> | <b>56.9</b>             | <b>5.2</b> | <b>-5.9</b>            | <b>0.1</b> |
| 76        | ZINC000034895992        | -29.2                    | 5.0        | -49.7                   | 2.7        | -29.8                  | 3.4        | 56.7                    | 4.3        | -6.4                   | 0.1        |
| 77        | ZINC000171342968        | -29.2                    | 4.9        | -48.4                   | 2.7        | -40.1                  | 3.9        | 65.5                    | 3.9        | -6.2                   | 0.2        |
| <b>78</b> | <b>ZINC000008595944</b> | <b>-29.1</b>             | <b>4.0</b> | <b>-53.1</b>            | <b>2.3</b> | <b>-13.8</b>           | <b>4.1</b> | <b>43.5</b>             | <b>4.1</b> | <b>-5.9</b>            | <b>0.1</b> |
| 79        | ZINC000091943530        | -29.0                    | 3.9        | -44.1                   | 2.7        | -17.5                  | 4.4        | 38.7                    | 3.3        | -6.0                   | 0.1        |
| 80        | ZINC000071746202        | -29.0                    | 3.7        | -47.6                   | 2.6        | -14.6                  | 3.6        | 39.6                    | 6.1        | -6.3                   | 0.1        |
| 81        | ZINC000257310083        | -28.9                    | 3.3        | -47.2                   | 2.6        | -17.0                  | 2.4        | 41.0                    | 2.4        | -5.8                   | 0.1        |
| 82        | ZINC000328587242        | -28.9                    | 3.2        | -45.2                   | 2.7        | -24.8                  | 2.6        | 47.4                    | 2.6        | -6.4                   | 0.1        |
| 83        | ZINC000012323932        | -28.9                    | 5.3        | -42.7                   | 3.2        | -38.4                  | 7.2        | 57.7                    | 3.8        | -5.5                   | 0.2        |
| 84        | ZINC000075118384        | -28.8                    | 4.8        | -46.9                   | 2.9        | -33.1                  | 7.3        | 57.3                    | 4.9        | -6.1                   | 0.1        |

| #          | ZINC ID                 | $\Delta G_{\text{bind}}$ | <i>std</i> | $\Delta E_{\text{vdW}}$ | <i>std</i> | $\Delta E_{\text{el}}$ | <i>std</i> | $\Delta G_{\text{pol}}$ | <i>std</i> | $\Delta G_{\text{np}}$ | <i>std</i> |
|------------|-------------------------|--------------------------|------------|-------------------------|------------|------------------------|------------|-------------------------|------------|------------------------|------------|
| 85         | ZINC000585280336        | -28.8                    | 5.1        | -51.7                   | 2.3        | -29.6                  | 5.8        | 58.2                    | 4.5        | -5.7                   | 0.1        |
| 86         | ZINC000096251711        | -28.8                    | 3.6        | -50.9                   | 3.0        | -15.0                  | 3.5        | 43.0                    | 3.3        | -5.9                   | 0.1        |
| 87         | ZINC000097413355        | -28.8                    | 2.9        | -46.7                   | 2.6        | -27.2                  | 3.2        | 50.9                    | 3.4        | -5.7                   | 0.1        |
| 88         | ZINC000257192562        | -28.7                    | 3.1        | -45.9                   | 2.2        | -17.6                  | 2.3        | 40.7                    | 2.5        | -5.9                   | 0.1        |
| 89         | ZINC000095951555        | -28.7                    | 2.9        | -42.9                   | 2.3        | -19.4                  | 3.3        | 38.9                    | 2.7        | -5.4                   | 0.1        |
| 90         | ZINC000007030648        | -28.7                    | 5.4        | -43.3                   | 2.9        | -21.2                  | 7.0        | 41.2                    | 3.4        | -5.3                   | 0.1        |
| 91         | ZINC000096003964        | -28.7                    | 4.9        | -49.1                   | 2.6        | -26.9                  | 4.8        | 52.8                    | 3.3        | -5.5                   | 0.1        |
| <b>92</b>  | <b>ZINC000004511530</b> | <b>-28.5</b>             | <b>3.3</b> | <b>-49.2</b>            | <b>2.1</b> | <b>-22.4</b>           | <b>3.0</b> | <b>48.9</b>             | <b>3.0</b> | <b>-5.7</b>            | <b>0.1</b> |
| 93         | ZINC000409428381        | -28.4                    | 3.8        | -51.5                   | 2.4        | -12.1                  | 4.9        | 41.9                    | 4.8        | -6.6                   | 0.1        |
| 94         | ZINC000096158052        | -28.4                    | 3.6        | -49.9                   | 2.5        | -20.8                  | 3.8        | 48.9                    | 4.1        | -6.6                   | 0.1        |
| 95         | ZINC000057526426        | -28.3                    | 3.0        | -44.4                   | 2.2        | -28.2                  | 3.1        | 50.3                    | 3.0        | -5.9                   | 0.1        |
| 96         | ZINC000014741626        | -28.3                    | 3.7        | -49.6                   | 2.2        | -7.1                   | 2.5        | 34.8                    | 4.5        | -6.3                   | 0.1        |
| 97         | ZINC000072290626        | -28.2                    | 4.5        | -48.7                   | 2.2        | -18.8                  | 5.2        | 45.2                    | 5.8        | -6.0                   | 0.1        |
| 98         | ZINC000067643674        | -28.2                    | 3.4        | -44.8                   | 2.5        | -25.4                  | 4.2        | 47.5                    | 3.2        | -5.6                   | 0.1        |
| 99         | ZINC000077503523        | -28.2                    | 3.7        | -45.1                   | 2.9        | -34.1                  | 6.6        | 56.3                    | 4.6        | -5.4                   | 0.1        |
| 100        | ZINC000100737122        | -28.1                    | 3.3        | -52.3                   | 2.5        | -22.6                  | 3.1        | 52.8                    | 4.1        | -6.0                   | 0.1        |
| 101        | ZINC000013973188        | -28.1                    | 4.1        | -47.2                   | 2.5        | -29.0                  | 3.6        | 53.8                    | 3.7        | -5.7                   | 0.1        |
| 102        | ZINC000069775761        | -28.1                    | 4.2        | -48.1                   | 2.6        | -21.4                  | 4.1        | 47.3                    | 3.1        | -6.0                   | 0.2        |
| 103        | ZINC000225489282        | -28.0                    | 3.7        | -49.8                   | 2.4        | -17.0                  | 4.8        | 44.6                    | 4.4        | -5.8                   | 0.1        |
| 104        | ZINC000008738218        | -27.9                    | 3.8        | -41.0                   | 2.9        | -41.3                  | 5.6        | 59.7                    | 3.9        | -5.3                   | 0.1        |
| 105        | ZINC000016228943        | -27.9                    | 3.1        | -43.6                   | 2.6        | -26.4                  | 3.3        | 47.8                    | 3.1        | -5.7                   | 0.1        |
| 106        | ZINC000035671101        | -27.9                    | 3.4        | -46.7                   | 2.0        | -8.1                   | 1.6        | 32.5                    | 3.3        | -5.7                   | 0.1        |
| 107        | ZINC000009338249        | -27.6                    | 4.9        | -47.0                   | 2.5        | -27.3                  | 4.7        | 52.1                    | 4.0        | -5.4                   | 0.1        |
| 108        | ZINC000069492530        | -27.6                    | 4.4        | -47.5                   | 2.6        | -19.0                  | 3.3        | 44.4                    | 3.1        | -5.6                   | 0.1        |
| 109        | ZINC000119429896        | -27.6                    | 3.6        | -49.5                   | 2.2        | -11.7                  | 2.9        | 39.9                    | 3.3        | -6.3                   | 0.1        |
| 110        | ZINC000585093122        | -27.5                    | 3.5        | -45.2                   | 2.6        | -16.9                  | 4.4        | 40.4                    | 4.0        | -5.8                   | 0.1        |
| 111        | ZINC000065248686        | -27.5                    | 3.3        | -45.7                   | 2.6        | -14.8                  | 2.7        | 38.6                    | 2.3        | -5.7                   | 0.1        |
| 112        | ZINC000003438521        | -27.5                    | 3.4        | -45.4                   | 2.3        | -24.1                  | 4.5        | 47.7                    | 4.2        | -5.7                   | 0.1        |
| 113        | ZINC000095393415        | -27.4                    | 4.4        | -54.8                   | 2.5        | -14.4                  | 3.2        | 47.4                    | 5.0        | -5.7                   | 0.1        |
| 114        | ZINC000079001413        | -27.4                    | 3.4        | -52.9                   | 2.5        | -9.0                   | 2.5        | 40.5                    | 2.8        | -6.0                   | 0.1        |
| 115        | ZINC000238121810        | -27.4                    | 5.9        | -37.2                   | 2.9        | -110.9                 | 10.4       | 126.7                   | 8.2        | -6.0                   | 0.1        |
| 116        | ZINC000007030710        | -27.4                    | 3.9        | -47.3                   | 2.7        | -25.7                  | 4.3        | 51.3                    | 3.2        | -5.6                   | 0.1        |
| 117        | ZINC000002750765        | -27.3                    | 3.6        | -45.0                   | 2.4        | -24.2                  | 2.9        | 47.7                    | 3.7        | -5.9                   | 0.1        |
| 118        | ZINC000100119126        | -27.3                    | 4.2        | -47.3                   | 2.8        | -19.9                  | 4.3        | 45.8                    | 4.0        | -5.8                   | 0.1        |
| <b>119</b> | <b>ZINC000069778215</b> | <b>-27.2</b>             | <b>3.7</b> | <b>-47.6</b>            | <b>2.7</b> | <b>-41.7</b>           | <b>4.2</b> | <b>68.1</b>             | <b>3.8</b> | <b>-6.1</b>            | <b>0.1</b> |
| 120        | ZINC000092021781        | -27.2                    | 3.8        | -49.3                   | 2.9        | -21.9                  | 5.0        | 50.3                    | 3.8        | -6.2                   | 0.1        |
| 121        | ZINC000035398834        | -27.2                    | 3.3        | -51.5                   | 2.3        | -8.9                   | 2.5        | 38.9                    | 3.3        | -5.7                   | 0.1        |
| 122        | ZINC000013691850        | -27.2                    | 2.9        | -49.9                   | 2.5        | -15.3                  | 3.3        | 43.5                    | 2.5        | -5.4                   | 0.1        |
| 123        | ZINC000050859891        | -27.2                    | 4.1        | -48.4                   | 2.6        | -28.7                  | 4.7        | 55.6                    | 5.3        | -5.7                   | 0.1        |
| 124        | ZINC000003292603        | -27.1                    | 3.3        | -47.2                   | 2.4        | -19.2                  | 3.7        | 45.4                    | 4.2        | -6.1                   | 0.1        |
| 125        | ZINC000058099587        | -27.1                    | 4.3        | -46.8                   | 2.8        | -18.8                  | 3.4        | 44.6                    | 4.2        | -6.0                   | 0.1        |
| 126        | ZINC000050584912        | -27.1                    | 4.2        | -50.3                   | 2.8        | -6.7                   | 3.9        | 36.0                    | 5.2        | -6.2                   | 0.1        |
| 127        | ZINC000071754931        | -26.9                    | 3.2        | -40.8                   | 2.3        | -12.7                  | 3.3        | 32.0                    | 3.0        | -5.5                   | 0.1        |
| 128        | ZINC000075140034        | -26.8                    | 3.1        | -41.8                   | 2.4        | -19.7                  | 2.9        | 40.8                    | 3.1        | -6.1                   | 0.1        |
| 129        | ZINC000069349055        | -26.8                    | 5.7        | -48.3                   | 3.0        | -24.4                  | 8.4        | 52.3                    | 6.0        | -6.4                   | 0.1        |
| 130        | ZINC000064871452        | -26.8                    | 4.5        | -49.9                   | 2.5        | -26.3                  | 7.2        | 55.5                    | 6.7        | -6.1                   | 0.1        |

| #   | ZINC ID                 | $\Delta G_{\text{bind}}$ | <i>std</i> | $\Delta E_{\text{vdW}}$ | <i>std</i> | $\Delta E_{\text{el}}$ | <i>std</i> | $\Delta G_{\text{pol}}$ | <i>std</i> | $\Delta G_{\text{np}}$ | <i>std</i> |
|-----|-------------------------|--------------------------|------------|-------------------------|------------|------------------------|------------|-------------------------|------------|------------------------|------------|
| 131 | ZINC000238886413        | -26.8                    | 4.6        | -49.4                   | 2.7        | -11.3                  | 3.3        | 39.7                    | 3.1        | -5.7                   | 0.1        |
| 132 | ZINC000040548686        | -26.7                    | 3.9        | -51.5                   | 2.2        | -22.0                  | 4.2        | 52.6                    | 3.9        | -5.8                   | 0.1        |
| 133 | ZINC000019973951        | -26.7                    | 4.1        | -40.3                   | 3.0        | -29.7                  | 6.5        | 49.1                    | 5.4        | -5.7                   | 0.1        |
| 134 | ZINC000002646979        | -26.6                    | 3.8        | -51.5                   | 2.3        | -22.4                  | 3.2        | 52.9                    | 3.5        | -5.7                   | 0.1        |
| 135 | ZINC000257218603        | -26.6                    | 4.1        | -50.2                   | 2.5        | -24.7                  | 5.1        | 54.9                    | 4.9        | -6.6                   | 0.1        |
| 136 | ZINC000044908085        | -26.4                    | 4.2        | -51.1                   | 2.7        | -21.0                  | 3.4        | 51.5                    | 3.5        | -5.9                   | 0.1        |
| 137 | <b>ZINC000023642159</b> | <b>-26.4</b>             | <b>3.8</b> | <b>-47.6</b>            | <b>2.3</b> | <b>-27.5</b>           | <b>4.0</b> | <b>54.8</b>             | <b>4.0</b> | <b>-6.2</b>            | <b>0.1</b> |
| 138 | ZINC000092760184        | -26.4                    | 3.3        | -47.5                   | 2.4        | -20.6                  | 3.3        | 47.9                    | 3.0        | -6.3                   | 0.1        |
| 139 | ZINC000257256038        | -26.3                    | 3.6        | -45.9                   | 2.4        | -25.3                  | 3.1        | 50.7                    | 3.0        | -5.9                   | 0.1        |
| 140 | ZINC000074014922        | -26.2                    | 2.7        | -47.0                   | 2.1        | -10.1                  | 2.3        | 36.3                    | 2.1        | -5.5                   | 0.1        |
| 141 | ZINC000072234903        | -26.2                    | 3.2        | -44.1                   | 2.2        | -12.2                  | 3.9        | 35.8                    | 5.0        | -5.6                   | 0.1        |
| 142 | ZINC000050857093        | -26.2                    | 5.0        | -48.7                   | 2.5        | -24.6                  | 3.8        | 53.0                    | 4.2        | -5.9                   | 0.1        |
| 143 | ZINC000018240833        | -26.2                    | 4.3        | -47.5                   | 2.8        | -36.3                  | 5.3        | 63.8                    | 4.2        | -6.2                   | 0.1        |
| 144 | ZINC000095447759        | -26.1                    | 4.4        | -46.9                   | 2.9        | -24.7                  | 5.4        | 51.0                    | 3.8        | -5.5                   | 0.1        |
| 145 | ZINC000016543876        | -26.1                    | 4.1        | -46.0                   | 2.3        | -18.4                  | 3.8        | 44.0                    | 2.6        | -5.7                   | 0.1        |
| 146 | ZINC000010218408        | -26.0                    | 5.8        | -47.3                   | 2.8        | -19.0                  | 5.6        | 45.8                    | 5.0        | -5.5                   | 0.1        |
| 147 | ZINC000018053795        | -25.9                    | 4.5        | -47.5                   | 2.3        | -23.2                  | 3.7        | 50.7                    | 4.3        | -5.9                   | 0.1        |
| 148 | ZINC000072896859        | -25.9                    | 4.2        | -48.3                   | 2.6        | -6.4                   | 5.0        | 34.9                    | 5.7        | -6.1                   | 0.1        |
| 149 | ZINC000042025678        | -25.9                    | 3.6        | -43.6                   | 4.1        | -13.2                  | 5.4        | 36.9                    | 3.6        | -5.9                   | 0.1        |
| 150 | ZINC000040060202        | -25.8                    | 3.3        | -46.1                   | 2.8        | -17.7                  | 3.4        | 44.3                    | 3.3        | -6.3                   | 0.1        |
| 151 | ZINC000067460397        | -25.7                    | 3.3        | -50.1                   | 2.2        | -34.7                  | 3.6        | 64.7                    | 3.6        | -5.6                   | 0.1        |
| 152 | ZINC000584887110        | -25.7                    | 3.5        | -46.9                   | 2.2        | -13.7                  | 2.9        | 40.8                    | 3.5        | -5.9                   | 0.1        |
| 153 | ZINC000096837115        | -25.6                    | 5.0        | -45.6                   | 4.0        | -26.8                  | 7.8        | 53.1                    | 8.2        | -6.3                   | 0.1        |
| 154 | ZINC000071282106        | -25.6                    | 4.6        | -47.7                   | 2.6        | -16.3                  | 4.9        | 44.5                    | 4.5        | -6.1                   | 0.1        |
| 155 | ZINC000091304527        | -25.6                    | 3.8        | -50.9                   | 2.5        | -14.3                  | 4.5        | 45.8                    | 5.0        | -6.2                   | 0.1        |
| 156 | ZINC000003875380        | -25.6                    | 3.1        | -46.6                   | 1.9        | -16.5                  | 2.0        | 43.0                    | 3.2        | -5.5                   | 0.1        |
| 157 | ZINC000003313076        | -25.5                    | 3.5        | -41.7                   | 3.0        | -21.4                  | 4.5        | 42.7                    | 2.9        | -5.2                   | 0.1        |
| 158 | ZINC000052955795        | -25.5                    | 4.2        | -46.7                   | 2.6        | -27.4                  | 4.9        | 54.8                    | 3.2        | -6.1                   | 0.1        |
| 159 | ZINC000170800517        | -25.5                    | 3.2        | -49.4                   | 2.4        | -18.6                  | 2.4        | 48.8                    | 3.0        | -6.2                   | 0.1        |
| 160 | ZINC000178511392        | -25.4                    | 3.8        | -40.2                   | 2.5        | -33.4                  | 4.1        | 53.6                    | 3.1        | -5.4                   | 0.1        |
| 161 | ZINC000069595091        | -25.3                    | 4.1        | -45.8                   | 2.8        | -22.3                  | 3.9        | 49.0                    | 6.2        | -6.2                   | 0.2        |
| 162 | ZINC000096251709        | -25.2                    | 3.5        | -48.0                   | 2.1        | -19.0                  | 3.2        | 47.7                    | 3.0        | -5.9                   | 0.1        |
| 163 | ZINC000028790813        | -25.2                    | 5.4        | -51.7                   | 2.7        | -23.6                  | 5.6        | 56.4                    | 5.4        | -6.3                   | 0.1        |
| 164 | ZINC000153353600        | -25.1                    | 4.4        | -46.2                   | 2.7        | -9.4                   | 3.9        | 36.8                    | 4.6        | -6.2                   | 0.2        |
| 165 | ZINC000072096437        | -25.1                    | 4.0        | -50.9                   | 2.4        | -18.7                  | 4.2        | 50.8                    | 4.1        | -6.3                   | 0.1        |
| 166 | ZINC000002922856        | -25.1                    | 3.8        | -52.4                   | 2.7        | -15.2                  | 3.6        | 48.4                    | 4.4        | -5.9                   | 0.1        |
| 167 | ZINC000077353582        | -25.1                    | 4.3        | -48.6                   | 2.8        | -15.7                  | 3.0        | 44.8                    | 2.7        | -5.5                   | 0.1        |
| 168 | ZINC000072300733        | -25.0                    | 5.1        | -51.3                   | 2.7        | -13.5                  | 4.4        | 45.6                    | 3.4        | -5.9                   | 0.1        |
| 169 | ZINC000000326909        | -25.0                    | 3.5        | -42.9                   | 2.1        | -16.5                  | 3.4        | 39.7                    | 2.6        | -5.2                   | 0.1        |
| 170 | ZINC000002630701        | -24.9                    | 3.6        | -49.0                   | 2.0        | -7.6                   | 4.1        | 37.4                    | 4.3        | -5.7                   | 0.1        |
| 171 | ZINC000084563579        | -24.8                    | 4.1        | -45.4                   | 4.0        | -21.3                  | 15.9       | 48.1                    | 12.0       | -6.3                   | 0.1        |
| 172 | ZINC000177842371        | -24.8                    | 3.4        | -45.3                   | 2.0        | -26.9                  | 3.7        | 52.7                    | 4.0        | -5.3                   | 0.1        |
| 173 | ZINC000306138347        | -24.8                    | 3.3        | -49.7                   | 2.0        | -17.4                  | 3.2        | 48.0                    | 3.1        | -5.8                   | 0.1        |
| 174 | ZINC000095503625        | -24.8                    | 4.1        | -50.6                   | 2.6        | -24.3                  | 4.9        | 56.3                    | 5.0        | -6.2                   | 0.1        |
| 175 | ZINC000023764785        | -24.7                    | 5.5        | -45.9                   | 2.6        | -14.8                  | 4.5        | 42.0                    | 4.4        | -6.1                   | 0.1        |
| 176 | ZINC000005426253        | -24.7                    | 3.8        | -49.8                   | 2.4        | -12.6                  | 3.2        | 44.1                    | 4.2        | -6.3                   | 0.1        |

| #   | ZINC ID          | $\Delta G_{\text{bind}}$ | <i>std</i> | $\Delta E_{\text{vdW}}$ | <i>std</i> | $\Delta E_{\text{el}}$ | <i>std</i> | $\Delta G_{\text{pol}}$ | <i>std</i> | $\Delta G_{\text{np}}$ | <i>std</i> |
|-----|------------------|--------------------------|------------|-------------------------|------------|------------------------|------------|-------------------------|------------|------------------------|------------|
| 177 | ZINC000072290753 | -24.6                    | 4.2        | -52.3                   | 2.4        | -25.4                  | 4.1        | 58.9                    | 3.8        | -5.8                   | 0.1        |
| 178 | ZINC000095402766 | -24.6                    | 5.5        | -44.9                   | 2.5        | -17.6                  | 7.1        | 43.9                    | 4.0        | -6.0                   | 0.1        |
| 179 | ZINC000072290711 | -24.6                    | 3.7        | -46.7                   | 2.9        | -17.3                  | 3.3        | 44.9                    | 4.1        | -5.5                   | 0.1        |
| 180 | ZINC000069740630 | -24.6                    | 5.3        | -38.0                   | 2.6        | -20.8                  | 4.5        | 40.0                    | 3.2        | -5.8                   | 0.1        |
| 181 | ZINC000019327176 | -24.5                    | 4.7        | -40.2                   | 3.0        | -26.9                  | 5.7        | 48.2                    | 6.1        | -5.7                   | 0.1        |
| 182 | ZINC000008776545 | -24.5                    | 3.4        | -47.3                   | 2.4        | -15.6                  | 2.9        | 44.0                    | 2.5        | -5.6                   | 0.1        |
| 183 | ZINC000003641308 | -24.5                    | 4.5        | -45.0                   | 2.6        | -25.1                  | 7.2        | 51.3                    | 8.7        | -5.6                   | 0.2        |
| 184 | ZINC000096024249 | -24.5                    | 4.2        | -47.4                   | 2.4        | -17.8                  | 5.0        | 45.9                    | 4.0        | -5.2                   | 0.1        |
| 185 | ZINC000008771448 | -24.4                    | 4.8        | -48.5                   | 3.0        | -22.3                  | 5.8        | 52.5                    | 6.8        | -6.1                   | 0.2        |
| 186 | ZINC000065167646 | -24.4                    | 5.6        | -47.8                   | 2.7        | -22.4                  | 4.0        | 51.6                    | 6.2        | -5.8                   | 0.1        |
| 187 | ZINC000005026046 | -24.4                    | 3.6        | -45.8                   | 2.3        | -14.0                  | 2.7        | 41.3                    | 4.9        | -5.9                   | 0.1        |
| 188 | ZINC000072235028 | -24.2                    | 3.6        | -52.8                   | 2.4        | -12.0                  | 4.3        | 46.7                    | 4.0        | -6.1                   | 0.1        |
| 189 | ZINC000072277544 | -24.2                    | 3.9        | -45.7                   | 2.8        | -14.8                  | 5.4        | 42.2                    | 5.1        | -5.8                   | 0.1        |
| 190 | ZINC000192753414 | -24.2                    | 4.5        | -46.9                   | 2.7        | -33.1                  | 4.6        | 61.1                    | 3.1        | -5.4                   | 0.1        |
| 191 | ZINC000245171655 | -24.2                    | 3.1        | -48.7                   | 2.3        | -10.2                  | 2.7        | 40.7                    | 2.6        | -6.0                   | 0.1        |
| 192 | ZINC000065463577 | -24.1                    | 3.9        | -46.6                   | 2.7        | -31.9                  | 5.2        | 60.0                    | 4.3        | -5.5                   | 0.1        |
| 193 | ZINC000135810445 | -24.1                    | 4.5        | -44.5                   | 2.6        | -33.4                  | 5.4        | 59.2                    | 5.0        | -5.5                   | 0.1        |
| 194 | ZINC000096010936 | -24.1                    | 3.0        | -41.4                   | 2.8        | -27.6                  | 3.2        | 50.7                    | 2.5        | -5.8                   | 0.1        |
| 195 | ZINC000071497775 | -24.0                    | 4.2        | -51.3                   | 2.3        | -25.4                  | 6.6        | 58.9                    | 5.6        | -6.2                   | 0.1        |
| 196 | ZINC000040386093 | -24.0                    | 3.7        | -45.0                   | 2.7        | -14.5                  | 3.0        | 41.3                    | 3.1        | -5.7                   | 0.1        |
| 197 | ZINC000096122792 | -24.0                    | 3.4        | -48.6                   | 2.6        | -9.0                   | 2.7        | 39.2                    | 3.4        | -5.6                   | 0.1        |
| 198 | ZINC000278659999 | -24.0                    | 4.3        | -47.8                   | 2.4        | -23.5                  | 3.5        | 53.4                    | 4.5        | -6.1                   | 0.1        |
| 199 | ZINC000029134571 | -24.0                    | 3.3        | -52.1                   | 2.4        | -19.8                  | 3.2        | 53.9                    | 3.3        | -5.9                   | 0.1        |
| 200 | ZINC000096038482 | -23.9                    | 4.1        | -39.5                   | 2.9        | -25.3                  | 6.7        | 46.8                    | 5.7        | -5.9                   | 0.1        |
| 201 | ZINC000253433259 | -23.9                    | 3.2        | -49.1                   | 2.2        | -19.7                  | 2.8        | 50.4                    | 2.6        | -5.5                   | 0.1        |
| 202 | ZINC000097105546 | -23.9                    | 4.0        | -44.7                   | 2.6        | -21.9                  | 3.7        | 48.0                    | 3.2        | -5.4                   | 0.1        |
| 203 | ZINC000062639858 | -23.9                    | 4.0        | -52.0                   | 2.2        | -3.7                   | 3.5        | 38.2                    | 4.7        | -6.5                   | 0.1        |
| 204 | ZINC000013691849 | -23.8                    | 4.6        | -44.2                   | 3.0        | -33.9                  | 4.8        | 59.9                    | 4.1        | -5.5                   | 0.1        |
| 205 | ZINC000001381807 | -23.7                    | 2.7        | -37.1                   | 2.1        | -15.1                  | 2.3        | 33.5                    | 2.9        | -5.1                   | 0.1        |
| 206 | ZINC000006669352 | -23.7                    | 3.8        | -47.6                   | 2.2        | -23.6                  | 5.5        | 53.3                    | 5.4        | -5.8                   | 0.1        |
| 207 | ZINC000091664087 | -23.3                    | 4.4        | -54.4                   | 2.3        | -8.4                   | 3.4        | 45.5                    | 3.8        | -6.1                   | 0.1        |
| 208 | ZINC000014240188 | -23.3                    | 3.6        | -45.7                   | 2.8        | -19.3                  | 4.2        | 47.2                    | 4.0        | -5.6                   | 0.1        |
| 209 | ZINC000012550491 | -23.3                    | 3.2        | -46.4                   | 2.6        | -24.3                  | 3.5        | 53.3                    | 2.9        | -5.8                   | 0.1        |
| 210 | ZINC000095989182 | -23.2                    | 3.1        | -43.2                   | 2.2        | -19.0                  | 3.6        | 44.1                    | 2.9        | -5.2                   | 0.1        |
| 211 | ZINC000257311417 | -23.2                    | 3.3        | -40.7                   | 2.2        | -22.2                  | 4.6        | 45.6                    | 4.8        | -5.9                   | 0.2        |
| 212 | ZINC000013692677 | -23.1                    | 4.8        | -51.9                   | 3.1        | -30.2                  | 4.7        | 65.1                    | 5.2        | -6.2                   | 0.1        |
| 213 | ZINC000004535480 | -23.1                    | 4.3        | -45.6                   | 2.2        | -15.5                  | 4.7        | 43.2                    | 5.4        | -5.2                   | 0.1        |
| 214 | ZINC000002465084 | -23.1                    | 4.0        | -49.8                   | 2.5        | -23.0                  | 3.3        | 55.5                    | 4.5        | -5.8                   | 0.1        |
| 215 | ZINC000003327891 | -23.1                    | 3.1        | -45.9                   | 2.2        | -11.5                  | 2.2        | 40.1                    | 3.2        | -5.8                   | 0.1        |
| 216 | ZINC000006782318 | -23.1                    | 3.5        | -47.7                   | 2.3        | -17.2                  | 2.7        | 47.6                    | 3.9        | -5.8                   | 0.1        |
| 217 | ZINC000040386098 | -23.0                    | 3.6        | -42.7                   | 2.5        | -14.7                  | 3.4        | 39.9                    | 3.3        | -5.6                   | 0.1        |
| 218 | ZINC000085879141 | -23.0                    | 3.3        | -41.7                   | 2.4        | -10.0                  | 5.3        | 34.6                    | 5.2        | -5.9                   | 0.1        |
| 219 | ZINC000006117573 | -22.9                    | 3.4        | -42.2                   | 2.4        | -29.4                  | 2.9        | 54.6                    | 3.4        | -5.8                   | 0.1        |
| 220 | ZINC000005088834 | -22.7                    | 3.5        | -42.9                   | 3.6        | -8.5                   | 2.5        | 34.6                    | 3.1        | -5.9                   | 0.1        |
| 221 | ZINC000097050589 | -22.7                    | 4.8        | -48.8                   | 2.6        | -13.0                  | 4.7        | 45.0                    | 5.3        | -5.8                   | 0.1        |
| 222 | ZINC000065395709 | -22.6                    | 4.0        | -51.6                   | 2.4        | -22.5                  | 3.1        | 57.5                    | 3.9        | -6.0                   | 0.1        |



| #   | ZINC ID          | $\Delta G_{\text{bind}}$ | <i>std</i> | $\Delta E_{\text{vdW}}$ | <i>std</i> | $\Delta E_{\text{el}}$ | <i>std</i> | $\Delta G_{\text{pol}}$ | <i>std</i> | $\Delta G_{\text{np}}$ | <i>std</i> |
|-----|------------------|--------------------------|------------|-------------------------|------------|------------------------|------------|-------------------------|------------|------------------------|------------|
| 223 | ZINC000004495846 | -22.6                    | 5.1        | -46.3                   | 2.7        | -25.8                  | 4.2        | 55.3                    | 4.7        | -5.8                   | 0.1        |
| 224 | ZINC000072437791 | -22.5                    | 3.2        | -46.5                   | 2.2        | -14.0                  | 3.0        | 43.6                    | 3.0        | -5.6                   | 0.1        |
| 225 | ZINC000027755553 | -22.5                    | 3.4        | -46.7                   | 2.1        | -15.9                  | 3.0        | 46.1                    | 3.3        | -6.0                   | 0.1        |
| 226 | ZINC000096069207 | -22.5                    | 3.7        | -52.2                   | 2.8        | -19.5                  | 2.9        | 55.3                    | 3.9        | -6.1                   | 0.1        |
| 227 | ZINC000057771728 | -22.4                    | 4.4        | -48.2                   | 2.5        | -23.3                  | 5.5        | 55.2                    | 5.7        | -6.1                   | 0.1        |
| 228 | ZINC000239762559 | -22.4                    | 4.5        | -48.8                   | 2.5        | -20.7                  | 4.1        | 53.2                    | 5.1        | -6.0                   | 0.1        |
| 229 | ZINC000003852421 | -22.3                    | 3.2        | -44.3                   | 2.1        | -12.6                  | 2.6        | 39.9                    | 2.8        | -5.3                   | 0.1        |
| 230 | ZINC000091321614 | -22.2                    | 4.4        | -49.4                   | 2.4        | -18.1                  | 3.8        | 51.6                    | 5.5        | -6.2                   | 0.1        |
| 231 | ZINC000299793701 | -22.0                    | 4.2        | -42.4                   | 2.8        | -25.9                  | 5.0        | 51.8                    | 3.9        | -5.6                   | 0.1        |
| 232 | ZINC000012407997 | -22.0                    | 4.4        | -48.0                   | 2.8        | -11.5                  | 5.7        | 43.9                    | 7.2        | -6.3                   | 0.1        |
| 233 | ZINC000584897275 | -21.8                    | 5.0        | -44.7                   | 2.8        | -36.2                  | 4.3        | 65.5                    | 6.0        | -6.5                   | 0.1        |
| 234 | ZINC000096069697 | -21.8                    | 5.2        | -45.5                   | 2.3        | -9.5                   | 5.4        | 39.1                    | 4.3        | -5.8                   | 0.1        |
| 235 | ZINC000257257831 | -21.8                    | 3.7        | -45.8                   | 2.2        | -13.1                  | 4.8        | 42.6                    | 4.5        | -5.5                   | 0.1        |
| 236 | ZINC000253407066 | -21.7                    | 3.6        | -46.7                   | 2.4        | -13.2                  | 3.4        | 43.9                    | 3.3        | -5.8                   | 0.1        |
| 237 | ZINC000001810957 | -21.6                    | 4.4        | -45.8                   | 2.6        | -17.6                  | 3.6        | 47.5                    | 4.6        | -5.7                   | 0.1        |
| 238 | ZINC000000489138 | -21.6                    | 3.7        | -50.3                   | 2.3        | -20.1                  | 2.9        | 54.4                    | 3.7        | -5.7                   | 0.1        |
| 239 | ZINC000330033487 | -21.5                    | 4.2        | -50.1                   | 2.6        | -15.4                  | 4.4        | 50.2                    | 3.6        | -6.2                   | 0.1        |
| 240 | ZINC000057511709 | -21.5                    | 4.8        | -45.5                   | 2.0        | -21.3                  | 5.0        | 51.2                    | 7.8        | -5.9                   | 0.1        |
| 241 | ZINC000006887927 | -21.1                    | 5.0        | -48.4                   | 2.6        | -23.5                  | 3.7        | 57.1                    | 5.3        | -6.3                   | 0.1        |
| 242 | ZINC000096080454 | -21.1                    | 3.1        | -44.4                   | 2.3        | -19.0                  | 2.8        | 47.9                    | 3.0        | -5.6                   | 0.1        |
| 243 | ZINC000040385901 | -21.0                    | 3.8        | -41.1                   | 2.8        | -13.7                  | 2.9        | 39.3                    | 3.2        | -5.4                   | 0.1        |
| 244 | ZINC000237955843 | -20.9                    | 4.2        | -40.6                   | 2.6        | -64.6                  | 10.7       | 90.5                    | 10.6       | -6.3                   | 0.2        |
| 245 | ZINC000091487017 | -20.8                    | 4.0        | -49.3                   | 2.3        | -11.6                  | 3.0        | 46.2                    | 3.6        | -6.2                   | 0.1        |
| 246 | ZINC000004722011 | -20.8                    | 3.3        | -44.0                   | 2.2        | -7.3                   | 2.7        | 36.4                    | 3.1        | -5.9                   | 0.1        |
| 247 | ZINC000257270100 | -20.8                    | 5.7        | -46.1                   | 2.5        | -11.5                  | 2.9        | 42.6                    | 4.7        | -5.8                   | 0.1        |
| 248 | ZINC000009318781 | -20.5                    | 4.5        | -46.3                   | 2.8        | -25.5                  | 6.6        | 56.7                    | 4.9        | -5.5                   | 0.1        |
| 249 | ZINC000575617533 | -20.5                    | 3.9        | -44.8                   | 2.3        | -10.6                  | 3.0        | 41.3                    | 4.7        | -6.4                   | 0.2        |
| 250 | ZINC000065591272 | -20.5                    | 3.6        | -44.9                   | 2.2        | -10.8                  | 2.9        | 41.1                    | 3.3        | -5.9                   | 0.1        |
| 251 | ZINC000005303591 | -20.5                    | 3.9        | -44.2                   | 2.5        | -20.1                  | 3.9        | 49.7                    | 4.2        | -5.9                   | 0.1        |
| 252 | ZINC000077522487 | -20.5                    | 4.1        | -48.6                   | 2.2        | -27.2                  | 5.2        | 61.8                    | 6.1        | -6.5                   | 0.1        |
| 253 | ZINC000072807915 | -20.4                    | 4.7        | -50.6                   | 2.3        | -8.1                   | 3.6        | 44.8                    | 5.8        | -6.4                   | 0.1        |
| 254 | ZINC000019328346 | -20.2                    | 4.4        | -46.7                   | 4.6        | -22.0                  | 4.6        | 54.4                    | 6.0        | -5.9                   | 0.1        |
| 255 | ZINC000237740654 | -20.2                    | 4.5        | -45.0                   | 2.8        | -28.0                  | 10.4       | 59.0                    | 11.9       | -6.2                   | 0.1        |
| 256 | ZINC000048249797 | -20.2                    | 4.7        | -50.8                   | 2.7        | -10.4                  | 5.2        | 47.3                    | 4.4        | -6.3                   | 0.1        |
| 257 | ZINC000002390471 | -20.1                    | 3.3        | -43.9                   | 2.0        | -12.0                  | 2.3        | 41.8                    | 3.1        | -5.9                   | 0.1        |
| 258 | ZINC000030875068 | -20.1                    | 4.1        | -45.9                   | 2.2        | -11.0                  | 3.9        | 42.4                    | 4.5        | -5.7                   | 0.1        |
| 259 | ZINC000107713021 | -19.9                    | 4.2        | -44.7                   | 2.2        | -3.4                   | 2.9        | 34.5                    | 3.7        | -6.2                   | 0.1        |
| 260 | ZINC000068269627 | -19.9                    | 5.5        | -50.4                   | 2.4        | -26.9                  | 4.4        | 63.7                    | 7.4        | -6.2                   | 0.1        |
| 261 | ZINC000089857747 | -19.7                    | 3.7        | -50.7                   | 4.5        | -7.1                   | 5.1        | 43.9                    | 9.7        | -5.8                   | 0.1        |
| 262 | ZINC000000079035 | -19.6                    | 5.7        | -47.2                   | 2.3        | -20.0                  | 5.4        | 53.8                    | 4.3        | -6.2                   | 0.1        |
| 263 | ZINC000022067509 | -19.6                    | 8.1        | -49.1                   | 2.8        | -56.9                  | 11.1       | 92.3                    | 9.7        | -5.9                   | 0.1        |
| 264 | ZINC000001620500 | -19.6                    | 7.0        | -42.1                   | 2.8        | -51.7                  | 24.4       | 80.2                    | 19.2       | -6.0                   | 0.1        |
| 265 | ZINC000005244779 | -19.6                    | 4.5        | -49.8                   | 2.4        | -9.1                   | 2.7        | 45.4                    | 4.4        | -6.1                   | 0.1        |
| 266 | ZINC000040266307 | -19.6                    | 4.2        | -44.5                   | 2.5        | -22.5                  | 4.2        | 53.2                    | 3.9        | -5.8                   | 0.1        |
| 267 | ZINC000253473237 | -19.5                    | 3.4        | -44.9                   | 2.2        | -8.2                   | 2.9        | 39.7                    | 3.1        | -6.0                   | 0.1        |
| 268 | ZINC000017888288 | -19.4                    | 4.7        | -44.1                   | 2.3        | -16.9                  | 4.4        | 47.3                    | 4.5        | -5.6                   | 0.1        |

| #   | ZINC ID          | $\Delta G_{\text{bind}}$ | <i>std</i> | $\Delta E_{\text{vdW}}$ | <i>std</i> | $\Delta E_{\text{el}}$ | <i>std</i> | $\Delta G_{\text{pol}}$ | <i>std</i> | $\Delta G_{\text{np}}$ | <i>std</i> |
|-----|------------------|--------------------------|------------|-------------------------|------------|------------------------|------------|-------------------------|------------|------------------------|------------|
| 269 | ZINC000012122382 | -19.2                    | 6.0        | -42.6                   | 2.3        | -9.5                   | 4.8        | 38.9                    | 6.5        | -6.1                   | 0.2        |
| 270 | ZINC000002837442 | -19.0                    | 3.6        | -42.9                   | 2.8        | -16.2                  | 2.5        | 46.0                    | 3.6        | -5.9                   | 0.2        |
| 271 | ZINC000012239509 | -19.0                    | 5.3        | -50.5                   | 2.5        | -8.0                   | 5.0        | 45.8                    | 3.9        | -6.3                   | 0.1        |
| 272 | ZINC000004732939 | -19.0                    | 3.5        | -43.8                   | 2.2        | -13.6                  | 3.0        | 44.6                    | 3.9        | -6.1                   | 0.1        |
| 273 | ZINC000253433605 | -19.0                    | 5.1        | -47.3                   | 2.5        | -14.9                  | 7.6        | 49.1                    | 5.6        | -5.9                   | 0.1        |
| 274 | ZINC000006918427 | -18.6                    | 4.4        | -45.0                   | 2.5        | -13.1                  | 4.0        | 45.2                    | 4.2        | -5.7                   | 0.1        |
| 275 | ZINC000019796838 | -18.4                    | 4.6        | -46.3                   | 2.1        | -10.9                  | 3.4        | 44.4                    | 3.9        | -5.7                   | 0.1        |
| 276 | ZINC000008609997 | -18.2                    | 3.9        | -50.6                   | 2.4        | -12.7                  | 3.4        | 51.3                    | 4.6        | -6.2                   | 0.1        |
| 277 | ZINC000005348603 | -18.1                    | 4.3        | -46.3                   | 2.6        | -9.9                   | 4.8        | 43.7                    | 5.3        | -5.6                   | 0.1        |
| 278 | ZINC000047209496 | -17.9                    | 5.5        | -44.4                   | 2.4        | -12.9                  | 5.2        | 45.4                    | 9.0        | -5.9                   | 0.1        |
| 279 | ZINC000072432742 | -17.9                    | 5.0        | -49.1                   | 2.3        | -23.0                  | 9.9        | 60.3                    | 10.1       | -6.1                   | 0.1        |
| 280 | ZINC000192929211 | -17.7                    | 6.2        | -44.2                   | 2.7        | -50.4                  | 8.5        | 82.9                    | 7.4        | -5.9                   | 0.1        |
| 281 | ZINC000136345745 | -17.6                    | 4.7        | -51.8                   | 2.4        | -18.5                  | 4.8        | 58.7                    | 4.6        | -6.0                   | 0.1        |
| 282 | ZINC000215185695 | -17.5                    | 3.1        | -47.4                   | 2.1        | -15.8                  | 2.1        | 52.2                    | 2.9        | -6.5                   | 0.1        |
| 283 | ZINC000012508838 | -17.1                    | 4.7        | -49.0                   | 2.3        | -24.7                  | 4.2        | 62.5                    | 5.2        | -5.9                   | 0.1        |
| 284 | ZINC000006556210 | -17.1                    | 4.0        | -41.4                   | 2.6        | -10.2                  | 2.5        | 39.9                    | 5.0        | -5.4                   | 0.1        |
| 285 | ZINC000012142779 | -16.9                    | 5.8        | -50.2                   | 2.6        | -15.4                  | 9.7        | 55.2                    | 7.6        | -6.4                   | 0.2        |
| 286 | ZINC000034407910 | -16.8                    | 3.6        | -38.4                   | 2.1        | -16.2                  | 2.9        | 43.1                    | 3.4        | -5.2                   | 0.1        |
| 287 | ZINC000255187536 | -16.7                    | 3.9        | -42.3                   | 2.5        | -21.5                  | 3.7        | 52.6                    | 3.7        | -5.5                   | 0.1        |
| 288 | ZINC000268943077 | -16.4                    | 4.4        | -41.8                   | 2.6        | -25.1                  | 8.3        | 56.3                    | 7.7        | -5.9                   | 0.1        |
| 289 | ZINC000170016387 | -16.3                    | 3.7        | -42.6                   | 2.8        | -20.5                  | 5.3        | 53.0                    | 5.0        | -6.2                   | 0.1        |
| 290 | ZINC000012557330 | -16.1                    | 4.7        | -43.0                   | 2.5        | -10.2                  | 4.3        | 42.6                    | 5.3        | -5.6                   | 0.1        |
| 291 | ZINC000238831563 | -15.8                    | 4.7        | -47.8                   | 2.5        | -11.5                  | 4.4        | 49.2                    | 4.0        | -5.6                   | 0.1        |
| 292 | ZINC000004807849 | -15.4                    | 5.2        | -36.5                   | 3.5        | -47.7                  | 6.0        | 73.9                    | 5.1        | -5.1                   | 0.1        |
| 293 | ZINC000284798034 | -15.2                    | 4.4        | -50.9                   | 2.3        | -22.1                  | 4.5        | 63.5                    | 5.1        | -5.7                   | 0.1        |
| 294 | ZINC000013278475 | -15.1                    | 5.3        | -48.6                   | 2.9        | -43.7                  | 10.1       | 83.1                    | 10.3       | -5.9                   | 0.2        |
| 295 | ZINC000061067795 | -15.1                    | 4.2        | -48.3                   | 2.2        | -15.0                  | 3.9        | 54.2                    | 5.0        | -5.8                   | 0.1        |
| 296 | ZINC000018177963 | -13.5                    | 3.6        | -32.7                   | 3.1        | -55.0                  | 5.3        | 79.4                    | 4.3        | -5.2                   | 0.1        |
| 297 | ZINC000000201272 | -13.1                    | 4.7        | -46.5                   | 2.2        | -6.7                   | 5.2        | 45.6                    | 4.2        | -5.7                   | 0.1        |
| 298 | ZINC000006576136 | -12.8                    | 5.0        | -34.5                   | 2.6        | -32.9                  | 10.1       | 59.9                    | 8.1        | -5.3                   | 0.1        |
| 299 | ZINC000237699092 | -11.6                    | 6.4        | -40.8                   | 3.4        | -32.2                  | 15.3       | 67.7                    | 15.9       | -6.2                   | 0.1        |
| 300 | ZINC000000353960 | -10.4                    | 7.0        | -35.6                   | 2.7        | -63.0                  | 13.2       | 93.5                    | 11.7       | -5.3                   | 0.1        |
| 301 | ZINC000096198984 | -10.0                    | 5.0        | -45.9                   | 2.9        | -8.7                   | 3.7        | 51.0                    | 5.6        | -6.4                   | 0.2        |
| 302 | ZINC000004806959 | -9.3                     | 5.2        | -39.4                   | 2.6        | -55.4                  | 9.5        | 91.1                    | 8.7        | -5.5                   | 0.1        |
| 303 | ZINC000069895275 | -9.0                     | 4.8        | -37.0                   | 2.2        | -35.4                  | 13.7       | 68.8                    | 12.0       | -5.3                   | 0.1        |
| 304 | ZINC000003947438 | -8.7                     | 5.4        | -41.0                   | 2.4        | -48.7                  | 9.2        | 87.2                    | 9.1        | -6.1                   | 0.1        |
| 305 | ZINC000008848147 | -5.4                     | 4.9        | -38.7                   | 3.2        | -26.7                  | 14.3       | 65.4                    | 12.0       | -5.4                   | 0.1        |

**Table S5.** Energy decomposition of the MM/GBSA results for the 305 compounds using the GB-1 parameter set (for more details see the Methods section). All energy terms are given in kcal/mol with their standard deviation (*std*) and are sorted by the binding free energy ( $\Delta G_{\text{bind}}$ ) followed by the molecular mechanics van der Waals and electrostatic interactions terms ( $\Delta E_{\text{vdW}}$  and  $\Delta E_{\text{el}}$ ) and the polar and non-polar contributions to the solvation free energy ( $\Delta G_{\text{pol}}$  and  $\Delta G_{\text{np}}$ ). Compounds marked in boldface were finally selected for experimental screening.

| #  | ZINC ID                 | $\Delta G_{\text{bind}}$ | <i>std</i> | $\Delta E_{\text{vdW}}$ | <i>std</i> | $\Delta E_{\text{el}}$ | <i>std</i> | $\Delta G_{\text{pol}}$ | <i>std</i> | $\Delta G_{\text{np}}$ | <i>std</i> |
|----|-------------------------|--------------------------|------------|-------------------------|------------|------------------------|------------|-------------------------|------------|------------------------|------------|
| 1  | ZINC000257317306        | -56.2                    | 2.9        | -50.1                   | 2.8        | -41.2                  | 3.3        | 41.5                    | 2.0        | -6.5                   | 0.2        |
| 2  | <b>ZINC000035869910</b> | <b>-55.5</b>             | <b>3.3</b> | <b>-54.6</b>            | <b>2.6</b> | <b>-34.9</b>           | <b>5.2</b> | <b>40.7</b>             | <b>2.8</b> | <b>-6.7</b>            | <b>0.1</b> |
| 3  | <b>ZINC000010256259</b> | <b>-53.6</b>             | <b>2.8</b> | <b>-52.7</b>            | <b>2.7</b> | <b>-41.4</b>           | <b>3.7</b> | <b>46.9</b>             | <b>2.5</b> | <b>-6.4</b>            | <b>0.1</b> |
| 4  | <b>ZINC000069778215</b> | <b>-53.5</b>             | <b>3.0</b> | <b>-47.6</b>            | <b>2.7</b> | <b>-42.2</b>           | <b>4.2</b> | <b>42.6</b>             | <b>2.2</b> | <b>-6.3</b>            | <b>0.1</b> |
| 5  | <b>ZINC000091270543</b> | <b>-53.3</b>             | <b>2.7</b> | <b>-53.6</b>            | <b>3.0</b> | <b>-21.4</b>           | <b>3.7</b> | <b>28.5</b>             | <b>2.4</b> | <b>-6.7</b>            | <b>0.1</b> |
| 6  | <b>ZINC000022191233</b> | <b>-53.1</b>             | <b>2.7</b> | <b>-53.6</b>            | <b>2.9</b> | <b>-30.9</b>           | <b>3.7</b> | <b>38.1</b>             | <b>2.5</b> | <b>-6.6</b>            | <b>0.1</b> |
| 7  | <b>ZINC000004998502</b> | <b>-52.8</b>             | <b>3.3</b> | <b>-53.5</b>            | <b>3.3</b> | <b>-40.0</b>           | <b>4.2</b> | <b>47.1</b>             | <b>2.7</b> | <b>-6.3</b>            | <b>0.2</b> |
| 8  | <b>ZINC000003463362</b> | <b>-52.6</b>             | <b>2.8</b> | <b>-50.0</b>            | <b>2.8</b> | <b>-30.0</b>           | <b>4.2</b> | <b>33.8</b>             | <b>2.8</b> | <b>-6.4</b>            | <b>0.2</b> |
| 9  | <b>ZINC000095415912</b> | <b>-52.6</b>             | <b>3.3</b> | <b>-53.2</b>            | <b>2.7</b> | <b>-29.2</b>           | <b>4.2</b> | <b>36.1</b>             | <b>2.6</b> | <b>-6.3</b>            | <b>0.1</b> |
| 10 | ZINC000091486946        | -52.2                    | 2.6        | -52.4                   | 2.6        | -21.3                  | 2.8        | 28.1                    | 2.3        | -6.7                   | 0.2        |
| 11 | ZINC000092022499        | -51.3                    | 2.4        | -53.4                   | 2.6        | -23.1                  | 2.7        | 31.7                    | 1.8        | -6.6                   | 0.1        |
| 12 | <b>ZINC000084578820</b> | <b>-51.1</b>             | <b>3.2</b> | <b>-47.8</b>            | <b>2.6</b> | <b>-35.2</b>           | <b>7.0</b> | <b>37.8</b>             | <b>3.8</b> | <b>-6.0</b>            | <b>0.1</b> |
| 13 | <b>ZINC000091486133</b> | <b>-51.0</b>             | <b>2.8</b> | <b>-52.7</b>            | <b>2.9</b> | <b>-25.9</b>           | <b>3.2</b> | <b>34.3</b>             | <b>2.2</b> | <b>-6.6</b>            | <b>0.2</b> |
| 14 | ZINC000075530913        | -50.9                    | 2.2        | -49.2                   | 2.3        | -20.2                  | 2.3        | 24.7                    | 1.5        | -6.2                   | 0.1        |
| 15 | ZINC000096058349        | -50.5                    | 2.6        | -54.1                   | 2.4        | -18.0                  | 2.3        | 28.1                    | 1.4        | -6.5                   | 0.1        |
| 16 | <b>ZINC000023642159</b> | <b>-50.5</b>             | <b>2.9</b> | <b>-47.6</b>            | <b>2.3</b> | <b>-27.3</b>           | <b>4.0</b> | <b>30.2</b>             | <b>2.0</b> | <b>-5.8</b>            | <b>0.2</b> |
| 17 | ZINC000091270544        | -50.0                    | 2.7        | -52.4                   | 2.7        | -22.1                  | 3.8        | 31.0                    | 2.4        | -6.5                   | 0.2        |
| 18 | <b>ZINC000057563200</b> | <b>-50.0</b>             | <b>3.1</b> | <b>-49.9</b>            | <b>2.7</b> | <b>-17.6</b>           | <b>4.6</b> | <b>23.4</b>             | <b>2.1</b> | <b>-6.0</b>            | <b>0.2</b> |
| 19 | <b>ZINC000000333210</b> | <b>-49.8</b>             | <b>2.7</b> | <b>-50.6</b>            | <b>3.0</b> | <b>-32.9</b>           | <b>3.7</b> | <b>39.8</b>             | <b>2.2</b> | <b>-6.1</b>            | <b>0.1</b> |
| 20 | ZINC000057731402        | -49.7                    | 2.9        | -51.2                   | 2.6        | -25.2                  | 3.7        | 33.0                    | 2.1        | -6.3                   | 0.1        |
| 21 | ZINC000092065700        | -49.7                    | 2.6        | -52.6                   | 2.5        | -19.8                  | 2.9        | 28.9                    | 2.1        | -6.1                   | 0.2        |
| 22 | <b>ZINC000025032259</b> | <b>-49.1</b>             | <b>2.9</b> | <b>-54.4</b>            | <b>2.7</b> | <b>-21.9</b>           | <b>3.2</b> | <b>33.6</b>             | <b>2.3</b> | <b>-6.4</b>            | <b>0.2</b> |
| 23 | <b>ZINC000008913866</b> | <b>-49.1</b>             | <b>3.4</b> | <b>-50.7</b>            | <b>2.5</b> | <b>-28.3</b>           | <b>6.0</b> | <b>36.3</b>             | <b>4.0</b> | <b>-6.4</b>            | <b>0.1</b> |
| 24 | <b>ZINC000005360885</b> | <b>-49.0</b>             | <b>3.3</b> | <b>-48.1</b>            | <b>2.7</b> | <b>-36.4</b>           | <b>4.9</b> | <b>41.1</b>             | <b>2.4</b> | <b>-5.6</b>            | <b>0.1</b> |
| 25 | <b>ZINC000002216953</b> | <b>-49.0</b>             | <b>2.5</b> | <b>-48.7</b>            | <b>2.4</b> | <b>-24.8</b>           | <b>3.2</b> | <b>30.6</b>             | <b>2.2</b> | <b>-6.2</b>            | <b>0.1</b> |
| 26 | <b>ZINC000084598177</b> | <b>-49.0</b>             | <b>2.5</b> | <b>-49.0</b>            | <b>2.5</b> | <b>-30.6</b>           | <b>3.3</b> | <b>36.3</b>             | <b>2.4</b> | <b>-5.8</b>            | <b>0.2</b> |
| 27 | <b>ZINC000015078577</b> | <b>-49.0</b>             | <b>2.8</b> | <b>-49.4</b>            | <b>2.8</b> | <b>-29.1</b>           | <b>4.5</b> | <b>35.8</b>             | <b>3.8</b> | <b>-6.3</b>            | <b>0.2</b> |
| 28 | ZINC000230113696        | -48.9                    | 2.8        | -52.9                   | 2.8        | -22.8                  | 4.3        | 33.0                    | 3.3        | -6.2                   | 0.1        |
| 29 | ZINC000334160460        | -48.7                    | 2.5        | -49.1                   | 2.5        | -22.2                  | 2.9        | 28.7                    | 1.6        | -6.1                   | 0.1        |
| 30 | ZINC000012142783        | -48.6                    | 3.1        | -51.0                   | 2.5        | -21.5                  | 5.1        | 30.1                    | 4.3        | -6.2                   | 0.2        |
| 31 | <b>ZINC000051467674</b> | <b>-48.6</b>             | <b>2.6</b> | <b>-46.6</b>            | <b>2.7</b> | <b>-40.6</b>           | <b>3.8</b> | <b>45.0</b>             | <b>2.3</b> | <b>-6.4</b>            | <b>0.1</b> |
| 32 | <b>ZINC000079491038</b> | <b>-48.5</b>             | <b>2.9</b> | <b>-51.3</b>            | <b>2.7</b> | <b>-27.7</b>           | <b>5.0</b> | <b>37.0</b>             | <b>3.8</b> | <b>-6.5</b>            | <b>0.1</b> |
| 33 | ZINC000257299555        | -48.4                    | 2.7        | -46.7                   | 3.1        | -36.0                  | 4.2        | 40.5                    | 3.0        | -6.2                   | 0.1        |
| 34 | ZINC000095950700        | -48.4                    | 2.4        | -48.8                   | 2.7        | -19.4                  | 2.1        | 25.9                    | 1.8        | -6.0                   | 0.2        |
| 35 | ZINC000096158052        | -48.3                    | 2.7        | -49.9                   | 2.5        | -20.8                  | 3.9        | 28.6                    | 2.8        | -6.2                   | 0.2        |
| 36 | ZINC000091768990        | -48.2                    | 2.6        | -52.4                   | 2.8        | -13.3                  | 2.6        | 23.8                    | 2.0        | -6.3                   | 0.1        |
| 37 | <b>ZINC000018148904</b> | <b>-48.2</b>             | <b>2.9</b> | <b>-50.1</b>            | <b>2.6</b> | <b>-32.7</b>           | <b>3.6</b> | <b>40.4</b>             | <b>2.3</b> | <b>-5.8</b>            | <b>0.1</b> |
| 38 | <b>ZINC000095410774</b> | <b>-48.2</b>             | <b>2.5</b> | <b>-50.5</b>            | <b>2.4</b> | <b>-22.8</b>           | <b>3.0</b> | <b>31.3</b>             | <b>2.2</b> | <b>-6.1</b>            | <b>0.1</b> |

| #         | ZINC ID                 | $\Delta G_{\text{bind}}$ | <i>std</i> | $\Delta E_{\text{vdW}}$ | <i>std</i> | $\Delta E_{\text{el}}$ | <i>std</i> | $\Delta G_{\text{pol}}$ | <i>std</i> | $\Delta G_{\text{np}}$ | <i>std</i> |
|-----------|-------------------------|--------------------------|------------|-------------------------|------------|------------------------|------------|-------------------------|------------|------------------------|------------|
| 39        | ZINC000575618196        | -48.1                    | 2.8        | -54.5                   | 2.7        | -27.7                  | 3.9        | 40.6                    | 2.5        | -6.4                   | 0.1        |
| 40        | ZINC000195547314        | -47.9                    | 2.8        | -50.9                   | 2.8        | -13.5                  | 3.3        | 22.8                    | 2.0        | -6.3                   | 0.2        |
| 41        | ZINC000072290753        | -47.8                    | 3.1        | -52.3                   | 2.4        | -26.0                  | 4.2        | 36.6                    | 2.7        | -6.1                   | 0.1        |
| 42        | ZINC000229623928        | -47.7                    | 2.5        | -50.6                   | 2.5        | -34.1                  | 3.8        | 43.3                    | 3.0        | -6.3                   | 0.1        |
| 43        | ZINC000065395709        | -47.7                    | 2.6        | -51.6                   | 2.4        | -22.3                  | 3.1        | 32.8                    | 2.0        | -6.6                   | 0.1        |
| 44        | ZINC000034895992        | -47.2                    | 3.0        | -49.7                   | 2.7        | -29.9                  | 3.5        | 38.7                    | 2.4        | -6.2                   | 0.2        |
| 45        | ZINC000002646979        | -47.2                    | 2.6        | -51.5                   | 2.3        | -22.3                  | 3.2        | 32.8                    | 2.4        | -6.3                   | 0.1        |
| 46        | ZINC000096199614        | -47.0                    | 2.9        | -51.3                   | 2.5        | -27.5                  | 3.7        | 37.5                    | 2.2        | -5.7                   | 0.1        |
| 47        | ZINC000100193430        | -46.9                    | 2.1        | -47.9                   | 2.4        | -13.6                  | 2.7        | 20.0                    | 1.8        | -5.3                   | 0.1        |
| <b>48</b> | <b>ZINC000069562405</b> | <b>-46.8</b>             | <b>2.5</b> | <b>-47.4</b>            | <b>2.6</b> | <b>-25.3</b>           | <b>2.9</b> | <b>31.8</b>             | <b>2.0</b> | <b>-5.9</b>            | <b>0.1</b> |
| 49        | ZINC000069846908        | -46.7                    | 3.4        | -50.0                   | 3.0        | -33.8                  | 7.9        | 43.2                    | 5.3        | -6.1                   | 0.2        |
| <b>50</b> | <b>ZINC000008595944</b> | <b>-46.7</b>             | <b>2.6</b> | <b>-53.1</b>            | <b>2.3</b> | <b>-13.9</b>           | <b>4.1</b> | <b>26.2</b>             | <b>3.0</b> | <b>-5.9</b>            | <b>0.1</b> |
| 51        | ZINC000100193536        | -46.6                    | 2.7        | -48.7                   | 2.9        | -15.8                  | 2.9        | 23.4                    | 2.1        | -5.5                   | 0.2        |
| 52        | ZINC000089827813        | -46.6                    | 3.3        | -46.6                   | 3.2        | -28.8                  | 4.7        | 34.5                    | 2.5        | -5.8                   | 0.2        |
| 53        | ZINC000064871452        | -46.5                    | 3.2        | -49.9                   | 2.5        | -27.1                  | 7.3        | 36.8                    | 5.2        | -6.2                   | 0.2        |
| 54        | ZINC000585280336        | -46.5                    | 3.8        | -51.7                   | 2.3        | -30.1                  | 5.9        | 41.7                    | 3.5        | -6.2                   | 0.1        |
| 55        | ZINC000075118384        | -46.4                    | 3.4        | -46.9                   | 2.9        | -33.8                  | 7.2        | 40.3                    | 4.1        | -5.9                   | 0.2        |
| 56        | ZINC000003641308        | -46.3                    | 5.2        | -45.0                   | 2.6        | -25.7                  | 7.4        | 30.1                    | 4.1        | -5.7                   | 0.2        |
| 57        | ZINC000257211885        | -46.3                    | 4.2        | -50.3                   | 3.9        | -20.9                  | 3.8        | 30.5                    | 2.4        | -5.6                   | 0.2        |
| <b>58</b> | <b>ZINC000069737923</b> | <b>-46.2</b>             | <b>2.8</b> | <b>-46.3</b>            | <b>2.3</b> | <b>-29.6</b>           | <b>4.0</b> | <b>35.8</b>             | <b>2.5</b> | <b>-6.1</b>            | <b>0.1</b> |
| 59        | ZINC000257218603        | -46.2                    | 2.8        | -50.2                   | 2.5        | -24.7                  | 5.1        | 35.1                    | 3.3        | -6.4                   | 0.1        |
| <b>60</b> | <b>ZINC000071915224</b> | <b>-46.2</b>             | <b>2.6</b> | <b>-49.3</b>            | <b>2.3</b> | <b>-26.0</b>           | <b>3.5</b> | <b>35.1</b>             | <b>2.6</b> | <b>-5.9</b>            | <b>0.1</b> |
| <b>61</b> | <b>ZINC000223692657</b> | <b>-46.0</b>             | <b>2.6</b> | <b>-50.8</b>            | <b>2.6</b> | <b>-27.8</b>           | <b>4.0</b> | <b>38.5</b>             | <b>2.4</b> | <b>-6.0</b>            | <b>0.1</b> |
| 62        | ZINC000096238948        | -46.0                    | 3.0        | -53.8                   | 2.7        | -13.0                  | 5.3        | 27.1                    | 4.4        | -6.2                   | 0.3        |
| 63        | ZINC000007030710        | -46.0                    | 3.0        | -47.3                   | 2.7        | -24.4                  | 4.2        | 31.4                    | 2.7        | -5.6                   | 0.1        |
| <b>64</b> | <b>ZINC000043550595</b> | <b>-45.9</b>             | <b>2.7</b> | <b>-48.3</b>            | <b>2.5</b> | <b>-29.1</b>           | <b>3.5</b> | <b>37.7</b>             | <b>2.0</b> | <b>-6.2</b>            | <b>0.2</b> |
| 65        | ZINC000096251711        | -45.8                    | 3.3        | -50.9                   | 3.0        | -15.0                  | 3.5        | 26.4                    | 2.1        | -6.2                   | 0.2        |
| 66        | ZINC000013692677        | -45.8                    | 3.8        | -51.9                   | 3.1        | -30.8                  | 4.7        | 43.5                    | 3.3        | -6.6                   | 0.2        |
| 67        | ZINC000257192562        | -45.7                    | 2.1        | -45.9                   | 2.2        | -16.4                  | 2.3        | 22.5                    | 1.6        | -5.9                   | 0.2        |
| 68        | ZINC000171342968        | -45.7                    | 3.2        | -48.4                   | 2.7        | -39.2                  | 3.9        | 48.3                    | 2.8        | -6.4                   | 0.1        |
| 69        | ZINC000194368147        | -45.7                    | 2.7        | -48.3                   | 2.8        | -30.0                  | 3.5        | 38.9                    | 2.1        | -6.4                   | 0.1        |
| 70        | ZINC000225746732        | -45.7                    | 2.2        | -47.5                   | 2.3        | -20.8                  | 2.3        | 28.0                    | 1.9        | -5.4                   | 0.2        |
| 71        | ZINC000100737122        | -45.6                    | 2.5        | -52.3                   | 2.5        | -22.5                  | 3.1        | 35.4                    | 2.5        | -6.2                   | 0.1        |
| 72        | ZINC000278659999        | -45.5                    | 2.5        | -47.8                   | 2.4        | -23.7                  | 3.5        | 31.9                    | 2.0        | -6.0                   | 0.2        |
| 73        | ZINC000225489282        | -45.5                    | 2.8        | -49.8                   | 2.4        | -16.6                  | 4.6        | 26.9                    | 3.3        | -6.1                   | 0.1        |
| 74        | ZINC000257206611        | -45.4                    | 2.9        | -55.3                   | 3.1        | -11.4                  | 5.7        | 27.7                    | 4.5        | -6.3                   | 0.2        |
| 75        | ZINC000095503625        | -45.4                    | 3.4        | -50.6                   | 2.6        | -24.3                  | 4.9        | 36.1                    | 3.4        | -6.6                   | 0.2        |
| 76        | ZINC000067460397        | -45.4                    | 2.3        | -50.1                   | 2.2        | -35.5                  | 3.5        | 46.1                    | 2.6        | -5.8                   | 0.1        |
| 77        | ZINC000004722089        | -45.3                    | 2.2        | -48.1                   | 2.5        | -14.4                  | 2.7        | 22.5                    | 1.7        | -5.3                   | 0.1        |
| 78        | ZINC000071282106        | -45.3                    | 3.2        | -47.7                   | 2.6        | -15.4                  | 4.9        | 24.0                    | 3.0        | -6.2                   | 0.2        |
| 79        | ZINC000097413355        | -45.3                    | 2.1        | -46.7                   | 2.6        | -27.5                  | 3.2        | 34.5                    | 2.2        | -5.7                   | 0.1        |
| 80        | ZINC000409428381        | -45.3                    | 3.1        | -51.5                   | 2.4        | -12.2                  | 4.9        | 25.0                    | 3.4        | -6.6                   | 0.1        |
| 81        | ZINC000092760184        | -45.2                    | 2.5        | -47.5                   | 2.4        | -20.1                  | 3.4        | 28.6                    | 2.3        | -6.2                   | 0.2        |
| 82        | ZINC000002922856        | -45.2                    | 3.1        | -52.4                   | 2.7        | -15.5                  | 3.6        | 29.0                    | 2.6        | -6.2                   | 0.1        |
| <b>83</b> | <b>ZINC000004511530</b> | <b>-45.2</b>             | <b>2.4</b> | <b>-49.2</b>            | <b>2.1</b> | <b>-22.6</b>           | <b>3.0</b> | <b>32.9</b>             | <b>2.1</b> | <b>-6.3</b>            | <b>0.1</b> |
| 84        | ZINC000097201269        | -45.1                    | 3.3        | -49.4                   | 2.6        | -16.9                  | 4.3        | 27.7                    | 2.7        | -6.4                   | 0.3        |

| #          | ZINC ID                 | $\Delta G_{\text{bind}}$ | <i>std</i> | $\Delta E_{\text{vdW}}$ | <i>std</i> | $\Delta E_{\text{el}}$ | <i>std</i> | $\Delta G_{\text{pol}}$ | <i>std</i> | $\Delta G_{\text{np}}$ | <i>std</i> |
|------------|-------------------------|--------------------------|------------|-------------------------|------------|------------------------|------------|-------------------------|------------|------------------------|------------|
| 85         | ZINC000005426253        | -45.1                    | 2.4        | -49.8                   | 2.4        | -11.6                  | 3.2        | 22.9                    | 2.9        | -6.5                   | 0.1        |
| 86         | ZINC000003292603        | -45.1                    | 2.6        | -47.2                   | 2.4        | -19.3                  | 3.6        | 27.5                    | 2.6        | -6.1                   | 0.2        |
| 87         | ZINC000014791001        | -45.1                    | 2.6        | -47.0                   | 2.3        | -21.3                  | 3.4        | 29.3                    | 2.8        | -6.1                   | 0.1        |
| 88         | ZINC000306141880        | -45.0                    | 2.6        | -46.5                   | 2.8        | -29.1                  | 4.2        | 36.6                    | 3.0        | -6.0                   | 0.1        |
| 89         | ZINC000096003964        | -45.0                    | 3.5        | -49.1                   | 2.6        | -26.2                  | 4.8        | 36.3                    | 2.3        | -5.9                   | 0.1        |
| 90         | ZINC000170800517        | -44.9                    | 2.3        | -49.4                   | 2.4        | -18.5                  | 2.4        | 29.5                    | 1.8        | -6.5                   | 0.2        |
| 91         | ZINC000009338249        | -44.9                    | 3.9        | -47.0                   | 2.5        | -27.4                  | 4.8        | 35.2                    | 3.0        | -5.6                   | 0.1        |
| 92         | ZINC000257310083        | -44.8                    | 2.5        | -47.2                   | 2.6        | -16.6                  | 2.4        | 24.4                    | 1.6        | -5.4                   | 0.1        |
| 93         | ZINC000000489138        | -44.7                    | 2.7        | -50.3                   | 2.3        | -20.6                  | 3.0        | 32.2                    | 2.0        | -6.1                   | 0.1        |
| 94         | ZINC000091664087        | -44.7                    | 2.9        | -54.4                   | 2.3        | -7.8                   | 3.5        | 23.9                    | 2.3        | -6.5                   | 0.1        |
| 95         | ZINC000095393415        | -44.7                    | 2.7        | -54.8                   | 2.5        | -14.5                  | 3.2        | 30.3                    | 2.7        | -5.8                   | 0.1        |
| 96         | ZINC000084686490        | -44.7                    | 2.4        | -46.1                   | 2.4        | -33.1                  | 3.1        | 40.6                    | 2.0        | -6.1                   | 0.1        |
| 97         | ZINC000019328346        | -44.7                    | 7.4        | -46.7                   | 4.6        | -22.0                  | 4.5        | 30.0                    | 2.2        | -5.9                   | 0.2        |
| 98         | ZINC000013973188        | -44.7                    | 2.5        | -47.2                   | 2.5        | -29.6                  | 3.6        | 38.1                    | 2.5        | -6.0                   | 0.1        |
| 99         | ZINC000040473994        | -44.6                    | 2.5        | -49.6                   | 2.8        | -26.3                  | 4.0        | 37.1                    | 2.4        | -5.9                   | 0.1        |
| 100        | ZINC000012323932        | -44.6                    | 3.3        | -42.7                   | 3.2        | -38.0                  | 7.3        | 41.7                    | 4.2        | -5.6                   | 0.2        |
| 101        | ZINC000079001413        | -44.5                    | 2.5        | -52.9                   | 2.5        | -9.1                   | 2.5        | 23.7                    | 1.9        | -6.2                   | 0.2        |
| 102        | ZINC000238886413        | -44.3                    | 3.1        | -49.4                   | 2.7        | -11.6                  | 3.3        | 22.6                    | 1.5        | -5.9                   | 0.2        |
| <b>103</b> | <b>ZINC000240454699</b> | <b>-44.3</b>             | <b>2.5</b> | <b>-42.5</b>            | <b>2.5</b> | <b>-24.0</b>           | <b>4.4</b> | <b>28.0</b>             | <b>3.1</b> | <b>-5.8</b>            | <b>0.1</b> |
| 104        | ZINC000022549345        | -44.3                    | 2.1        | -53.9                   | 2.1        | -18.2                  | 3.8        | 33.7                    | 3.6        | -5.9                   | 0.1        |
| 105        | ZINC000238121810        | -44.3                    | 3.4        | -37.2                   | 2.9        | -88.8                  | 10.4       | 87.6                    | 8.6        | -6.0                   | 0.2        |
| 106        | ZINC000029134571        | -44.3                    | 2.4        | -52.1                   | 2.4        | -19.6                  | 3.3        | 33.5                    | 2.6        | -6.1                   | 0.1        |
| 107        | ZINC000069349055        | -44.2                    | 3.4        | -48.3                   | 3.0        | -24.2                  | 8.4        | 34.5                    | 5.5        | -6.2                   | 0.2        |
| 108        | ZINC000011781217        | -44.2                    | 2.6        | -52.0                   | 2.2        | -13.2                  | 2.4        | 27.3                    | 2.0        | -6.2                   | 0.2        |
| 109        | ZINC000100191495        | -44.2                    | 2.7        | -46.6                   | 2.6        | -14.2                  | 2.7        | 22.0                    | 1.9        | -5.4                   | 0.1        |
| 110        | ZINC000328587242        | -44.2                    | 2.4        | -45.2                   | 2.7        | -23.7                  | 2.6        | 30.9                    | 1.8        | -6.1                   | 0.2        |
| 111        | ZINC000071497775        | -44.2                    | 3.2        | -51.3                   | 2.3        | -25.4                  | 6.7        | 39.0                    | 4.7        | -6.4                   | 0.2        |
| 112        | ZINC000065248686        | -44.1                    | 2.5        | -45.7                   | 2.6        | -14.1                  | 2.7        | 21.5                    | 1.5        | -5.9                   | 0.1        |
| 113        | ZINC000069775761        | -44.1                    | 3.5        | -48.1                   | 2.6        | -21.8                  | 4.1        | 31.7                    | 1.9        | -5.9                   | 0.1        |
| 114        | ZINC000216315534        | -44.1                    | 2.4        | -41.9                   | 2.5        | -27.2                  | 4.7        | 30.6                    | 3.3        | -5.6                   | 0.1        |
| 115        | ZINC000096069207        | -44.0                    | 2.8        | -52.2                   | 2.8        | -20.5                  | 2.9        | 35.0                    | 2.2        | -6.4                   | 0.2        |
| 116        | ZINC000050584912        | -44.0                    | 3.3        | -50.3                   | 2.8        | -6.3                   | 3.9        | 18.6                    | 3.7        | -6.1                   | 0.3        |
| 117        | ZINC000002465084        | -43.8                    | 3.0        | -49.8                   | 2.5        | -23.7                  | 3.3        | 35.8                    | 2.4        | -6.1                   | 0.1        |
| 118        | ZINC000003438521        | -43.8                    | 2.5        | -45.4                   | 2.3        | -22.7                  | 4.5        | 29.9                    | 2.8        | -5.7                   | 0.1        |
| 119        | ZINC000021835963        | -43.8                    | 2.5        | -48.7                   | 2.2        | -26.2                  | 3.3        | 36.9                    | 2.0        | -5.8                   | 0.1        |
| 120        | ZINC000013691849        | -43.6                    | 3.3        | -44.2                   | 3.0        | -33.9                  | 4.8        | 40.2                    | 2.7        | -5.6                   | 0.2        |
| 121        | ZINC000072290711        | -43.6                    | 2.6        | -46.7                   | 2.9        | -16.6                  | 3.3        | 25.0                    | 2.3        | -5.3                   | 0.2        |
| 122        | ZINC000091304527        | -43.6                    | 2.8        | -50.9                   | 2.5        | -14.0                  | 4.5        | 27.5                    | 3.3        | -6.2                   | 0.2        |
| 123        | ZINC000077503523        | -43.6                    | 2.7        | -45.1                   | 2.9        | -34.1                  | 6.9        | 41.4                    | 4.9        | -5.7                   | 0.2        |
| 124        | ZINC000092078469        | -43.5                    | 3.7        | -45.0                   | 3.2        | -23.4                  | 3.5        | 30.3                    | 2.7        | -5.5                   | 0.3        |
| 125        | ZINC000096251709        | -43.5                    | 2.6        | -48.0                   | 2.1        | -18.9                  | 3.2        | 29.2                    | 1.8        | -5.8                   | 0.2        |
| 126        | ZINC000008316344        | -43.5                    | 2.5        | -51.0                   | 2.4        | -4.6                   | 2.6        | 18.0                    | 2.0        | -5.9                   | 0.2        |
| <b>127</b> | <b>ZINC000244816835</b> | <b>-43.5</b>             | <b>2.7</b> | <b>-43.8</b>            | <b>3.0</b> | <b>-34.1</b>           | <b>3.6</b> | <b>40.2</b>             | <b>2.0</b> | <b>-5.8</b>            | <b>0.1</b> |
| 128        | ZINC000253433259        | -43.4                    | 2.3        | -49.1                   | 2.2        | -19.7                  | 2.9        | 31.2                    | 2.3        | -5.8                   | 0.1        |
| 129        | ZINC000072096437        | -43.4                    | 2.5        | -50.9                   | 2.4        | -18.3                  | 4.2        | 32.5                    | 3.0        | -6.7                   | 0.1        |
| 130        | ZINC000069492530        | -43.4                    | 2.9        | -47.5                   | 2.6        | -19.0                  | 3.3        | 28.6                    | 1.9        | -5.5                   | 0.2        |

| #          | ZINC ID                 | $\Delta G_{\text{bind}}$ | <i>std</i> | $\Delta E_{\text{vdW}}$ | <i>std</i> | $\Delta E_{\text{el}}$ | <i>std</i> | $\Delta G_{\text{pol}}$ | <i>std</i> | $\Delta G_{\text{np}}$ | <i>std</i> |
|------------|-------------------------|--------------------------|------------|-------------------------|------------|------------------------|------------|-------------------------|------------|------------------------|------------|
| 131        | ZINC000257222272        | -43.4                    | 2.5        | -51.4                   | 2.2        | -7.3                   | 2.1        | 21.6                    | 1.6        | -6.3                   | 0.1        |
| 132        | ZINC000028790813        | -43.4                    | 3.4        | -51.7                   | 2.7        | -24.1                  | 5.5        | 38.4                    | 3.6        | -5.9                   | 0.2        |
| 133        | ZINC000065167646        | -43.3                    | 3.1        | -47.8                   | 2.7        | -21.8                  | 4.0        | 32.3                    | 3.4        | -6.0                   | 0.1        |
| 134        | ZINC000044908085        | -43.3                    | 3.2        | -51.1                   | 2.7        | -21.0                  | 3.5        | 34.5                    | 2.7        | -5.7                   | 0.2        |
| <b>135</b> | <b>ZINC000044919578</b> | <b>-43.2</b>             | <b>2.1</b> | <b>-43.0</b>            | <b>2.1</b> | <b>-29.0</b>           | <b>3.4</b> | <b>34.2</b>             | <b>2.1</b> | <b>-5.5</b>            | <b>0.1</b> |
| 136        | ZINC000257256038        | -43.2                    | 2.3        | -45.9                   | 2.4        | -24.2                  | 3.1        | 33.2                    | 1.8        | -6.2                   | 0.1        |
| 137        | ZINC000072300733        | -43.0                    | 3.7        | -51.3                   | 2.7        | -12.8                  | 4.4        | 27.3                    | 2.9        | -6.2                   | 0.2        |
| 138        | ZINC000092021781        | -43.0                    | 2.9        | -49.3                   | 2.9        | -20.5                  | 5.0        | 33.0                    | 3.5        | -6.1                   | 0.1        |
| 139        | ZINC000006669352        | -42.9                    | 2.5        | -47.6                   | 2.2        | -23.0                  | 5.5        | 34.0                    | 4.2        | -6.3                   | 0.1        |
| 140        | ZINC000004495846        | -42.9                    | 2.7        | -46.3                   | 2.7        | -26.6                  | 4.2        | 35.6                    | 3.5        | -5.8                   | 0.2        |
| 141        | ZINC000584887110        | -42.9                    | 2.3        | -46.9                   | 2.2        | -14.2                  | 2.8        | 23.8                    | 2.0        | -5.7                   | 0.1        |
| 142        | ZINC000044874685        | -42.8                    | 2.9        | -44.2                   | 2.8        | -22.4                  | 4.6        | 29.5                    | 3.6        | -5.7                   | 0.2        |
| 143        | ZINC000052955795        | -42.8                    | 2.8        | -46.7                   | 2.6        | -27.1                  | 4.8        | 37.0                    | 2.9        | -6.0                   | 0.1        |
| 144        | ZINC000072437791        | -42.7                    | 2.1        | -46.5                   | 2.2        | -12.5                  | 3.0        | 22.2                    | 2.0        | -5.9                   | 0.1        |
| 145        | ZINC000012550491        | -42.7                    | 2.6        | -46.4                   | 2.6        | -23.5                  | 3.5        | 33.0                    | 2.2        | -5.7                   | 0.1        |
| 146        | ZINC000035398834        | -42.5                    | 2.3        | -51.5                   | 2.3        | -9.7                   | 2.6        | 24.6                    | 2.1        | -6.0                   | 0.1        |
| 147        | ZINC000135810445        | -42.5                    | 2.9        | -44.5                   | 2.6        | -31.9                  | 5.3        | 39.8                    | 3.6        | -5.9                   | 0.2        |
| 148        | ZINC000002750765        | -42.5                    | 2.4        | -45.0                   | 2.4        | -24.4                  | 3.0        | 32.8                    | 2.3        | -6.0                   | 0.1        |
| 149        | ZINC000065463577        | -42.5                    | 2.6        | -46.6                   | 2.7        | -32.2                  | 5.4        | 42.3                    | 4.2        | -5.9                   | 0.1        |
| 150        | ZINC000584897275        | -42.3                    | 2.6        | -44.7                   | 2.8        | -36.7                  | 4.3        | 44.8                    | 3.0        | -5.7                   | 0.1        |
| 151        | ZINC000057526426        | -42.3                    | 2.5        | -44.4                   | 2.2        | -27.1                  | 3.1        | 35.0                    | 2.4        | -5.7                   | 0.1        |
| 152        | ZINC000040548686        | -42.2                    | 2.5        | -51.5                   | 2.2        | -23.2                  | 4.2        | 38.5                    | 2.7        | -6.0                   | 0.1        |
| 153        | ZINC000072235028        | -42.1                    | 2.6        | -52.8                   | 2.4        | -12.4                  | 4.3        | 29.4                    | 3.0        | -6.3                   | 0.1        |
| 154        | ZINC000095469884        | -42.1                    | 2.6        | -40.0                   | 2.8        | -35.7                  | 3.7        | 38.6                    | 1.9        | -5.0                   | 0.1        |
| 155        | ZINC000100119126        | -42.0                    | 3.1        | -47.3                   | 2.8        | -19.9                  | 4.4        | 31.2                    | 3.0        | -6.0                   | 0.2        |
| 156        | ZINC000006887927        | -42.0                    | 2.5        | -48.4                   | 2.6        | -23.8                  | 3.7        | 36.4                    | 2.4        | -6.3                   | 0.1        |
| 157        | ZINC000072290626        | -42.0                    | 2.6        | -48.7                   | 2.2        | -19.4                  | 5.3        | 31.8                    | 4.4        | -5.7                   | 0.1        |
| 158        | ZINC000050857093        | -42.0                    | 3.6        | -48.7                   | 2.5        | -25.4                  | 3.8        | 38.4                    | 2.7        | -6.2                   | 0.1        |
| 159        | ZINC000119429896        | -41.9                    | 2.4        | -49.5                   | 2.2        | -9.9                   | 2.9        | 23.8                    | 2.2        | -6.3                   | 0.2        |
| 160        | ZINC000069595091        | -41.9                    | 2.9        | -45.8                   | 2.8        | -22.4                  | 3.9        | 32.2                    | 3.1        | -6.0                   | 0.2        |
| 161        | ZINC000096010936        | -41.9                    | 2.6        | -41.4                   | 2.8        | -26.7                  | 3.3        | 32.2                    | 1.9        | -5.9                   | 0.1        |
| 162        | ZINC000040060202        | -41.8                    | 2.6        | -46.1                   | 2.8        | -17.7                  | 3.4        | 27.9                    | 2.4        | -6.0                   | 0.2        |
| 163        | ZINC000095447759        | -41.8                    | 3.5        | -46.9                   | 2.9        | -24.8                  | 5.5        | 35.6                    | 3.3        | -5.8                   | 0.1        |
| 164        | ZINC000057771728        | -41.8                    | 3.3        | -48.2                   | 2.5        | -24.0                  | 5.5        | 36.6                    | 3.4        | -6.2                   | 0.3        |
| 165        | ZINC000068269627        | -41.7                    | 2.5        | -50.4                   | 2.4        | -27.6                  | 4.4        | 42.2                    | 4.0        | -5.9                   | 0.2        |
| 166        | ZINC000012888207        | -41.7                    | 2.1        | -40.8                   | 2.2        | -27.0                  | 3.4        | 31.2                    | 2.2        | -5.1                   | 0.1        |
| 167        | ZINC000050859891        | -41.6                    | 3.3        | -48.4                   | 2.6        | -29.5                  | 4.7        | 42.1                    | 3.6        | -5.9                   | 0.2        |
| 168        | ZINC000074014922        | -41.6                    | 2.2        | -47.0                   | 2.1        | -9.6                   | 2.2        | 20.6                    | 1.9        | -5.7                   | 0.1        |
| 169        | ZINC000040386093        | -41.6                    | 2.8        | -45.0                   | 2.7        | -13.8                  | 2.9        | 22.7                    | 2.4        | -5.4                   | 0.2        |
| 170        | ZINC000071746202        | -41.5                    | 2.8        | -47.6                   | 2.6        | -15.1                  | 3.6        | 27.3                    | 2.6        | -6.1                   | 0.2        |
| 171        | ZINC000012142779        | -41.5                    | 4.4        | -50.2                   | 2.6        | -15.4                  | 9.4        | 30.5                    | 6.4        | -6.4                   | 0.2        |
| 172        | ZINC000005244779        | -41.4                    | 2.4        | -49.8                   | 2.4        | -9.7                   | 2.7        | 24.1                    | 2.4        | -6.1                   | 0.1        |
| 173        | ZINC000096024249        | -41.4                    | 2.9        | -47.4                   | 2.4        | -18.1                  | 5.1        | 29.4                    | 3.4        | -5.3                   | 0.2        |
| 174        | ZINC000016228943        | -41.4                    | 2.5        | -43.6                   | 2.6        | -26.3                  | 3.4        | 33.9                    | 2.1        | -5.4                   | 0.2        |
| 175        | ZINC000245171655        | -41.4                    | 2.4        | -48.7                   | 2.3        | -10.2                  | 2.7        | 23.3                    | 1.8        | -5.8                   | 0.2        |
| 176        | ZINC000022241454        | -41.4                    | 3.2        | -39.1                   | 2.9        | -38.4                  | 6.7        | 41.0                    | 5.3        | -5.0                   | 0.2        |

| #   | ZINC ID          | $\Delta G_{\text{bind}}$ | <i>std</i> | $\Delta E_{\text{vdW}}$ | <i>std</i> | $\Delta E_{\text{el}}$ | <i>std</i> | $\Delta G_{\text{pol}}$ | <i>std</i> | $\Delta G_{\text{np}}$ | <i>std</i> |
|-----|------------------|--------------------------|------------|-------------------------|------------|------------------------|------------|-------------------------|------------|------------------------|------------|
| 177 | ZINC000062639858 | -41.2                    | 2.4        | -52.0                   | 2.2        | -3.0                   | 3.4        | 20.1                    | 2.8        | -6.4                   | 0.2        |
| 178 | ZINC000008771448 | -41.2                    | 4.1        | -48.5                   | 3.0        | -23.5                  | 6.0        | 36.6                    | 4.8        | -5.8                   | 0.4        |
| 179 | ZINC000009318781 | -41.2                    | 3.1        | -46.3                   | 2.8        | -25.9                  | 6.6        | 36.6                    | 3.9        | -5.5                   | 0.1        |
| 180 | ZINC000058099587 | -41.2                    | 2.8        | -46.8                   | 2.8        | -18.8                  | 3.4        | 29.8                    | 2.4        | -5.3                   | 0.2        |
| 181 | ZINC000178511392 | -41.2                    | 2.7        | -40.2                   | 2.5        | -33.5                  | 4.1        | 37.7                    | 2.6        | -5.2                   | 0.1        |
| 182 | ZINC000005303591 | -41.1                    | 2.3        | -44.2                   | 2.5        | -20.2                  | 3.9        | 28.9                    | 2.4        | -5.7                   | 0.1        |
| 183 | ZINC000010218408 | -41.1                    | 3.9        | -47.3                   | 2.8        | -19.2                  | 5.7        | 30.7                    | 3.4        | -5.3                   | 0.2        |
| 184 | ZINC000003875380 | -41.1                    | 2.1        | -46.6                   | 1.9        | -15.5                  | 2.0        | 25.9                    | 1.7        | -4.9                   | 0.1        |
| 185 | ZINC000072807915 | -41.1                    | 2.4        | -50.6                   | 2.3        | -7.2                   | 3.6        | 22.8                    | 3.3        | -6.1                   | 0.2        |
| 186 | ZINC000018053795 | -41.0                    | 2.9        | -47.5                   | 2.3        | -22.6                  | 3.8        | 34.8                    | 2.6        | -5.8                   | 0.1        |
| 187 | ZINC000014240188 | -41.0                    | 2.7        | -45.7                   | 2.8        | -17.2                  | 4.2        | 27.7                    | 3.3        | -5.8                   | 0.1        |
| 188 | ZINC000077353582 | -41.0                    | 3.2        | -48.6                   | 2.8        | -15.4                  | 3.1        | 28.6                    | 2.1        | -5.5                   | 0.1        |
| 189 | ZINC000239762559 | -40.9                    | 2.7        | -48.8                   | 2.5        | -21.2                  | 4.1        | 34.8                    | 2.9        | -5.7                   | 0.2        |
| 190 | ZINC000067643674 | -40.9                    | 2.4        | -44.8                   | 2.5        | -25.8                  | 4.2        | 35.1                    | 2.3        | -5.4                   | 0.1        |
| 191 | ZINC000089857747 | -40.8                    | 3.9        | -50.7                   | 4.5        | -7.6                   | 5.0        | 23.4                    | 5.5        | -5.9                   | 0.3        |
| 192 | ZINC000154455008 | -40.7                    | 3.4        | -44.9                   | 2.8        | -15.2                  | 6.0        | 25.2                    | 2.8        | -5.8                   | 0.2        |
| 193 | ZINC000306138347 | -40.7                    | 2.2        | -49.7                   | 2.0        | -17.2                  | 3.2        | 32.1                    | 2.5        | -5.9                   | 0.2        |
| 194 | ZINC000585093122 | -40.6                    | 2.4        | -45.2                   | 2.6        | -16.8                  | 4.4        | 27.0                    | 2.8        | -5.6                   | 0.2        |
| 195 | ZINC000008738218 | -40.6                    | 2.9        | -41.0                   | 2.9        | -40.6                  | 5.5        | 46.7                    | 3.2        | -5.6                   | 0.1        |
| 196 | ZINC000091487017 | -40.6                    | 2.4        | -49.3                   | 2.3        | -11.4                  | 3.0        | 26.4                    | 2.4        | -6.2                   | 0.1        |
| 197 | ZINC000007030648 | -40.6                    | 3.6        | -43.3                   | 2.9        | -20.2                  | 7.1        | 27.9                    | 3.2        | -5.0                   | 0.3        |
| 198 | ZINC000192753414 | -40.5                    | 3.1        | -46.9                   | 2.7        | -32.1                  | 4.6        | 44.2                    | 2.3        | -5.7                   | 0.1        |
| 199 | ZINC000096837115 | -40.5                    | 5.9        | -45.6                   | 4.0        | -27.4                  | 7.7        | 38.3                    | 5.2        | -5.7                   | 0.3        |
| 200 | ZINC000077522487 | -40.5                    | 2.5        | -48.6                   | 2.2        | -28.5                  | 5.2        | 42.4                    | 4.0        | -5.8                   | 0.2        |
| 201 | ZINC000018240833 | -40.5                    | 2.9        | -47.5                   | 2.8        | -37.8                  | 5.3        | 51.0                    | 3.3        | -6.2                   | 0.2        |
| 202 | ZINC000084563579 | -40.4                    | 3.1        | -45.4                   | 4.0        | -20.3                  | 15.5       | 31.0                    | 12.0       | -5.8                   | 0.2        |
| 203 | ZINC000095402766 | -40.4                    | 4.5        | -44.9                   | 2.5        | -16.8                  | 7.1        | 27.2                    | 3.3        | -5.9                   | 0.1        |
| 204 | ZINC000330033487 | -40.4                    | 3.0        | -50.1                   | 2.6        | -15.9                  | 4.3        | 31.8                    | 2.5        | -6.1                   | 0.1        |
| 205 | ZINC000136345745 | -40.4                    | 2.6        | -51.8                   | 2.4        | -19.5                  | 4.9        | 37.1                    | 4.1        | -6.2                   | 0.2        |
| 206 | ZINC000006117573 | -40.3                    | 2.4        | -42.2                   | 2.4        | -28.0                  | 2.9        | 35.4                    | 2.1        | -5.5                   | 0.1        |
| 207 | ZINC000040266307 | -40.3                    | 3.0        | -44.5                   | 2.5        | -22.2                  | 4.2        | 32.5                    | 2.9        | -6.1                   | 0.2        |
| 208 | ZINC000095989182 | -40.2                    | 2.5        | -43.2                   | 2.2        | -18.7                  | 3.6        | 27.1                    | 2.2        | -5.4                   | 0.1        |
| 209 | ZINC000000079035 | -40.2                    | 3.4        | -47.2                   | 2.3        | -19.1                  | 5.5        | 31.8                    | 3.2        | -5.7                   | 0.1        |
| 210 | ZINC000016543876 | -40.2                    | 3.2        | -46.0                   | 2.3        | -16.9                  | 3.7        | 28.5                    | 2.2        | -5.9                   | 0.1        |
| 211 | ZINC000071754931 | -40.2                    | 2.5        | -40.8                   | 2.3        | -12.2                  | 3.3        | 18.3                    | 1.9        | -5.5                   | 0.1        |
| 212 | ZINC000019327176 | -40.2                    | 3.2        | -40.2                   | 3.0        | -26.8                  | 5.7        | 31.9                    | 3.4        | -5.2                   | 0.2        |
| 213 | ZINC000177842371 | -40.1                    | 2.4        | -45.3                   | 2.0        | -26.9                  | 3.8        | 37.3                    | 2.8        | -5.3                   | 0.1        |
| 214 | ZINC000048249797 | -40.1                    | 2.6        | -50.8                   | 2.7        | -10.3                  | 5.2        | 27.1                    | 3.5        | -6.2                   | 0.1        |
| 215 | ZINC000012508838 | -40.1                    | 2.7        | -49.0                   | 2.3        | -24.8                  | 4.2        | 39.9                    | 2.9        | -6.2                   | 0.1        |
| 216 | ZINC000097105546 | -40.1                    | 2.5        | -44.7                   | 2.6        | -22.4                  | 3.8        | 32.6                    | 3.4        | -5.6                   | 0.1        |
| 217 | ZINC000013691850 | -40.1                    | 2.3        | -49.9                   | 2.5        | -15.3                  | 3.3        | 30.8                    | 2.1        | -5.7                   | 0.1        |
| 218 | ZINC000002630701 | -40.1                    | 2.4        | -49.0                   | 2.0        | -6.8                   | 4.2        | 21.4                    | 3.4        | -5.8                   | 0.1        |
| 219 | ZINC000096122792 | -40.1                    | 2.5        | -48.6                   | 2.6        | -9.2                   | 2.7        | 23.4                    | 2.2        | -5.7                   | 0.1        |
| 220 | ZINC000091321614 | -39.9                    | 2.8        | -49.4                   | 2.4        | -18.7                  | 3.8        | 34.3                    | 3.4        | -6.1                   | 0.2        |
| 221 | ZINC000075140034 | -39.9                    | 2.4        | -41.8                   | 2.4        | -19.3                  | 2.9        | 27.0                    | 2.0        | -5.7                   | 0.2        |
| 222 | ZINC000019973951 | -39.9                    | 3.8        | -40.3                   | 3.0        | -29.4                  | 6.4        | 34.9                    | 3.3        | -5.1                   | 0.2        |

| #   | ZINC ID          | $\Delta G_{\text{bind}}$ | <i>std</i> | $\Delta E_{\text{vdW}}$ | <i>std</i> | $\Delta E_{\text{el}}$ | <i>std</i> | $\Delta G_{\text{pol}}$ | <i>std</i> | $\Delta G_{\text{np}}$ | <i>std</i> |
|-----|------------------|--------------------------|------------|-------------------------|------------|------------------------|------------|-------------------------|------------|------------------------|------------|
| 223 | ZINC000014741626 | -39.8                    | 2.2        | -49.6                   | 2.2        | -6.8                   | 2.5        | 22.4                    | 2.1        | -5.8                   | 0.2        |
| 224 | ZINC000095951555 | -39.8                    | 2.4        | -42.9                   | 2.3        | -19.3                  | 3.3        | 27.8                    | 1.8        | -5.5                   | 0.1        |
| 225 | ZINC000096069697 | -39.7                    | 4.2        | -45.5                   | 2.3        | -9.3                   | 5.4        | 20.8                    | 2.9        | -5.7                   | 0.2        |
| 226 | ZINC000022067509 | -39.7                    | 3.0        | -49.1                   | 2.8        | -30.2                  | 10.7       | 45.7                    | 8.9        | -6.1                   | 0.1        |
| 227 | ZINC000023764785 | -39.6                    | 3.3        | -45.9                   | 2.6        | -15.6                  | 4.6        | 27.8                    | 3.0        | -5.9                   | 0.2        |
| 228 | ZINC000035671101 | -39.6                    | 2.1        | -46.7                   | 2.0        | -8.2                   | 1.6        | 20.4                    | 1.5        | -5.1                   | 0.2        |
| 229 | ZINC000097050589 | -39.5                    | 2.6        | -48.8                   | 2.6        | -13.2                  | 4.8        | 28.0                    | 3.3        | -5.6                   | 0.1        |
| 230 | ZINC000065591272 | -39.4                    | 2.3        | -44.9                   | 2.2        | -9.7                   | 2.8        | 21.1                    | 1.9        | -6.0                   | 0.2        |
| 231 | ZINC000284798034 | -39.4                    | 2.8        | -50.9                   | 2.3        | -22.8                  | 4.5        | 40.3                    | 3.0        | -6.1                   | 0.2        |
| 232 | ZINC000004535480 | -39.4                    | 2.5        | -45.6                   | 2.2        | -15.4                  | 4.8        | 26.7                    | 3.9        | -5.1                   | 0.2        |
| 233 | ZINC000006782318 | -39.3                    | 2.3        | -47.7                   | 2.3        | -18.1                  | 2.7        | 32.2                    | 2.3        | -5.7                   | 0.2        |
| 234 | ZINC000012407997 | -39.2                    | 3.4        | -48.0                   | 2.8        | -11.5                  | 5.8        | 26.3                    | 4.7        | -6.1                   | 0.4        |
| 235 | ZINC000005026046 | -39.2                    | 2.6        | -45.8                   | 2.3        | -14.0                  | 2.7        | 26.3                    | 1.9        | -5.7                   | 0.2        |
| 236 | ZINC000061067795 | -39.2                    | 2.3        | -48.3                   | 2.2        | -13.8                  | 3.9        | 29.1                    | 3.0        | -6.2                   | 0.2        |
| 237 | ZINC000040386098 | -39.2                    | 2.5        | -42.7                   | 2.5        | -13.8                  | 3.3        | 22.5                    | 2.3        | -5.2                   | 0.2        |
| 238 | ZINC000253407066 | -39.1                    | 2.5        | -46.7                   | 2.4        | -13.8                  | 3.4        | 27.6                    | 2.6        | -6.1                   | 0.2        |
| 239 | ZINC000299793701 | -38.9                    | 2.4        | -42.4                   | 2.8        | -24.9                  | 5.0        | 33.9                    | 3.3        | -5.5                   | 0.1        |
| 240 | ZINC000005348603 | -38.9                    | 2.6        | -46.3                   | 2.6        | -8.7                   | 4.7        | 22.0                    | 3.6        | -5.8                   | 0.1        |
| 241 | ZINC000091943530 | -38.8                    | 2.5        | -44.1                   | 2.7        | -16.2                  | 4.1        | 27.0                    | 2.4        | -5.5                   | 0.2        |
| 242 | ZINC000030875068 | -38.8                    | 2.4        | -45.9                   | 2.2        | -10.0                  | 4.0        | 22.8                    | 2.5        | -5.7                   | 0.1        |
| 243 | ZINC000003313076 | -38.7                    | 2.6        | -41.7                   | 3.0        | -21.1                  | 4.5        | 29.7                    | 2.3        | -5.5                   | 0.1        |
| 244 | ZINC000238831563 | -38.6                    | 3.2        | -47.8                   | 2.5        | -11.4                  | 4.4        | 26.7                    | 2.5        | -6.0                   | 0.1        |
| 245 | ZINC000153353600 | -38.6                    | 3.8        | -46.2                   | 2.7        | -8.9                   | 3.8        | 22.2                    | 2.8        | -5.7                   | 0.2        |
| 246 | ZINC000012239509 | -38.6                    | 2.9        | -50.5                   | 2.5        | -7.5                   | 4.9        | 25.5                    | 3.2        | -6.1                   | 0.2        |
| 247 | ZINC000096080454 | -38.6                    | 2.3        | -44.4                   | 2.3        | -19.6                  | 2.8        | 31.1                    | 2.1        | -5.7                   | 0.1        |
| 248 | ZINC000192929211 | -38.5                    | 2.7        | -44.2                   | 2.7        | -24.0                  | 8.6        | 35.6                    | 7.1        | -5.8                   | 0.1        |
| 249 | ZINC000072896859 | -38.5                    | 2.5        | -48.3                   | 2.6        | -6.8                   | 5.0        | 22.6                    | 4.0        | -6.0                   | 0.2        |
| 250 | ZINC000257270100 | -38.5                    | 3.4        | -46.1                   | 2.5        | -10.6                  | 2.9        | 24.0                    | 2.5        | -5.9                   | 0.1        |
| 251 | ZINC000257257831 | -38.4                    | 3.0        | -45.8                   | 2.2        | -12.3                  | 4.7        | 25.3                    | 3.3        | -5.7                   | 0.2        |
| 252 | ZINC000002837442 | -38.3                    | 2.8        | -42.9                   | 2.8        | -16.1                  | 2.5        | 26.4                    | 1.6        | -5.7                   | 0.2        |
| 253 | ZINC000008776545 | -38.2                    | 2.5        | -47.3                   | 2.4        | -15.4                  | 2.9        | 30.5                    | 2.0        | -6.0                   | 0.1        |
| 254 | ZINC000003327891 | -38.1                    | 2.3        | -45.9                   | 2.2        | -11.8                  | 2.2        | 25.3                    | 1.8        | -5.7                   | 0.2        |
| 255 | ZINC000001810957 | -38.1                    | 2.4        | -45.8                   | 2.6        | -17.2                  | 3.6        | 30.8                    | 2.9        | -5.9                   | 0.2        |
| 256 | ZINC000040385901 | -38.0                    | 2.9        | -41.1                   | 2.8        | -13.0                  | 2.9        | 21.0                    | 2.2        | -4.9                   | 0.2        |
| 257 | ZINC000008609997 | -37.6                    | 2.9        | -50.6                   | 2.4        | -13.5                  | 3.5        | 32.2                    | 2.7        | -5.7                   | 0.2        |
| 258 | ZINC000047209496 | -37.3                    | 3.1        | -44.4                   | 2.4        | -13.3                  | 5.2        | 26.2                    | 5.1        | -5.8                   | 0.2        |
| 259 | ZINC000253473237 | -37.3                    | 2.1        | -44.9                   | 2.2        | -8.3                   | 2.8        | 21.9                    | 1.9        | -5.9                   | 0.2        |
| 260 | ZINC000072277544 | -37.2                    | 3.7        | -45.7                   | 2.8        | -15.0                  | 5.4        | 29.2                    | 3.9        | -5.6                   | 0.2        |
| 261 | ZINC000215185695 | -37.2                    | 2.2        | -47.4                   | 2.1        | -16.7                  | 2.1        | 33.2                    | 1.8        | -6.3                   | 0.2        |
| 262 | ZINC000003852421 | -37.0                    | 2.0        | -44.3                   | 2.1        | -12.3                  | 2.6        | 24.8                    | 2.0        | -5.3                   | 0.1        |
| 263 | ZINC000057511709 | -36.9                    | 2.4        | -45.5                   | 2.0        | -22.5                  | 5.0        | 36.7                    | 4.5        | -5.5                   | 0.2        |
| 264 | ZINC000072234903 | -36.8                    | 2.7        | -44.1                   | 2.2        | -12.5                  | 3.9        | 25.6                    | 3.2        | -5.8                   | 0.1        |
| 265 | ZINC000027755553 | -36.8                    | 2.5        | -46.7                   | 2.1        | -15.5                  | 3.0        | 31.1                    | 2.3        | -5.5                   | 0.1        |
| 266 | ZINC000072432742 | -36.6                    | 2.5        | -49.1                   | 2.3        | 1.8                    | 9.9        | 17.0                    | 9.4        | -6.3                   | 0.1        |
| 267 | ZINC000253433605 | -36.5                    | 3.4        | -47.3                   | 2.5        | -14.5                  | 7.6        | 31.1                    | 5.9        | -5.8                   | 0.2        |
| 268 | ZINC000107713021 | -36.4                    | 2.5        | -44.7                   | 2.2        | -2.8                   | 2.9        | 16.8                    | 2.6        | -5.7                   | 0.2        |



| #   | ZINC ID          | $\Delta G_{\text{bind}}$ | <i>std</i> | $\Delta E_{\text{vdW}}$ | <i>std</i> | $\Delta E_{\text{el}}$ | <i>std</i> | $\Delta G_{\text{pol}}$ | <i>std</i> | $\Delta G_{\text{np}}$ | <i>std</i> |
|-----|------------------|--------------------------|------------|-------------------------|------------|------------------------|------------|-------------------------|------------|------------------------|------------|
| 269 | ZINC000042025678 | -36.4                    | 2.7        | -43.6                   | 4.1        | -12.3                  | 5.3        | 24.6                    | 2.6        | -5.1                   | 0.2        |
| 270 | ZINC000000326909 | -36.3                    | 2.7        | -42.9                   | 2.1        | -17.0                  | 3.4        | 28.3                    | 1.9        | -4.7                   | 0.2        |
| 271 | ZINC000004807849 | -36.3                    | 2.6        | -36.5                   | 3.5        | -47.4                  | 6.0        | 52.9                    | 4.0        | -5.3                   | 0.2        |
| 272 | ZINC000019796838 | -36.1                    | 2.6        | -46.3                   | 2.1        | -11.2                  | 3.5        | 26.7                    | 2.6        | -5.4                   | 0.2        |
| 273 | ZINC000575617533 | -36.1                    | 2.3        | -44.8                   | 2.3        | -10.3                  | 2.9        | 24.7                    | 2.8        | -5.7                   | 0.2        |
| 274 | ZINC000096038482 | -36.0                    | 3.0        | -39.5                   | 2.9        | -24.6                  | 6.7        | 33.4                    | 4.4        | -5.3                   | 0.2        |
| 275 | ZINC000013278475 | -36.0                    | 3.3        | -48.6                   | 2.9        | -19.5                  | 10.1       | 38.2                    | 9.3        | -6.0                   | 0.2        |
| 276 | ZINC000170016387 | -35.9                    | 2.4        | -42.6                   | 2.8        | -20.3                  | 5.4        | 32.8                    | 4.0        | -5.7                   | 0.2        |
| 277 | ZINC000257311417 | -35.5                    | 2.5        | -40.7                   | 2.2        | -23.4                  | 4.5        | 34.1                    | 3.5        | -5.5                   | 0.2        |
| 278 | ZINC000069740630 | -35.5                    | 5.0        | -38.0                   | 2.6        | -20.4                  | 4.3        | 28.2                    | 2.2        | -5.3                   | 0.3        |
| 279 | ZINC000018177963 | -35.3                    | 2.2        | -32.7                   | 3.1        | -55.9                  | 5.3        | 58.4                    | 3.2        | -5.1                   | 0.1        |
| 280 | ZINC000017888288 | -35.1                    | 2.7        | -44.1                   | 2.3        | -16.9                  | 4.5        | 31.0                    | 3.1        | -5.1                   | 0.2        |
| 281 | ZINC000002390471 | -35.1                    | 2.1        | -43.9                   | 2.0        | -12.4                  | 2.2        | 26.7                    | 1.9        | -5.5                   | 0.2        |
| 282 | ZINC000004722011 | -35.0                    | 2.5        | -44.0                   | 2.2        | -7.1                   | 2.8        | 21.3                    | 2.2        | -5.2                   | 0.2        |
| 283 | ZINC000005088834 | -35.0                    | 3.2        | -42.9                   | 3.6        | -7.6                   | 2.4        | 21.1                    | 1.8        | -5.5                   | 0.2        |
| 284 | ZINC000004732939 | -34.8                    | 2.6        | -43.8                   | 2.2        | -12.5                  | 3.0        | 27.0                    | 2.4        | -5.5                   | 0.1        |
| 285 | ZINC000012122382 | -34.7                    | 2.7        | -42.6                   | 2.3        | -9.7                   | 4.8        | 23.0                    | 3.5        | -5.4                   | 0.2        |
| 286 | ZINC000237740654 | -34.7                    | 3.1        | -45.0                   | 2.8        | -3.6                   | 10.2       | 19.7                    | 10.0       | -5.8                   | 0.3        |
| 287 | ZINC000001381807 | -34.6                    | 2.0        | -37.1                   | 2.1        | -14.9                  | 2.3        | 22.4                    | 1.5        | -5.0                   | 0.1        |
| 288 | ZINC000000201272 | -34.5                    | 3.0        | -46.5                   | 2.2        | -7.2                   | 5.3        | 24.9                    | 3.8        | -5.8                   | 0.1        |
| 289 | ZINC000085879141 | -34.0                    | 2.4        | -41.7                   | 2.4        | -10.6                  | 5.3        | 23.3                    | 3.5        | -5.1                   | 0.1        |
| 290 | ZINC000001620500 | -33.9                    | 6.5        | -42.1                   | 2.8        | -26.7                  | 24.3       | 40.3                    | 18.3       | -5.4                   | 0.2        |
| 291 | ZINC000237955843 | -33.8                    | 3.9        | -40.6                   | 2.6        | -42.8                  | 10.6       | 55.2                    | 9.6        | -5.6                   | 0.2        |
| 292 | ZINC000255187536 | -33.7                    | 2.4        | -42.3                   | 2.5        | -21.3                  | 3.7        | 35.5                    | 2.6        | -5.6                   | 0.2        |
| 293 | ZINC000012557330 | -33.7                    | 2.4        | -43.0                   | 2.5        | -10.6                  | 4.3        | 25.1                    | 3.4        | -5.2                   | 0.2        |
| 294 | ZINC000006918427 | -33.6                    | 3.2        | -45.0                   | 2.5        | -13.2                  | 4.0        | 30.2                    | 2.8        | -5.6                   | 0.2        |
| 295 | ZINC000034407910 | -33.3                    | 1.9        | -38.4                   | 2.1        | -15.1                  | 2.8        | 25.1                    | 1.9        | -4.9                   | 0.1        |
| 296 | ZINC000006556210 | -33.2                    | 2.5        | -41.4                   | 2.6        | -11.3                  | 2.5        | 24.8                    | 2.5        | -5.2                   | 0.2        |
| 297 | ZINC000268943077 | -32.5                    | 2.7        | -41.8                   | 2.6        | 6.5                    | 8.3        | 8.2                     | 7.7        | -5.4                   | 0.2        |
| 298 | ZINC000004806959 | -32.3                    | 2.7        | -39.4                   | 2.6        | -29.2                  | 9.6        | 42.0                    | 8.3        | -5.7                   | 0.1        |
| 299 | ZINC000096198984 | -32.0                    | 2.9        | -45.9                   | 2.9        | -8.9                   | 3.7        | 28.7                    | 3.4        | -5.9                   | 0.3        |
| 300 | ZINC000003947438 | -30.6                    | 2.7        | -41.0                   | 2.4        | -21.6                  | 9.2        | 37.3                    | 7.9        | -5.3                   | 0.2        |
| 301 | ZINC000000353960 | -30.5                    | 3.7        | -35.6                   | 2.7        | -38.0                  | 13.3       | 48.0                    | 10.7       | -4.9                   | 0.2        |
| 302 | ZINC000237699092 | -28.0                    | 3.5        | -40.8                   | 3.4        | -8.7                   | 15.4       | 26.6                    | 14.8       | -5.1                   | 0.3        |
| 303 | ZINC000069895275 | -25.4                    | 3.5        | -37.0                   | 2.2        | -10.2                  | 13.6       | 26.9                    | 11.3       | -5.0                   | 0.2        |
| 304 | ZINC000006576136 | -22.8                    | 2.3        | -34.5                   | 2.6        | -6.9                   | 10.0       | 23.3                    | 8.6        | -4.7                   | 0.1        |
| 305 | ZINC000008848147 | -22.4                    | 2.6        | -38.7                   | 3.2        | -0.8                   | 14.1       | 22.1                    | 12.5       | -5.0                   | 0.1        |

**Table S6.** Energy decomposition of the MM/GBSA results for the 305 compounds using the GB-5 parameter set (for more details see the Methods section). All energy terms are given in kcal/mol with their standard deviation (*std*) and are sorted by the binding free energy ( $\Delta G_{\text{bind}}$ ) followed by the molecular mechanics van der Waals and electrostatic interactions terms ( $\Delta E_{\text{vdW}}$  and  $\Delta E_{\text{el}}$ ) and the polar and non-polar contributions to the solvation free energy ( $\Delta G_{\text{pol}}$  and  $\Delta G_{\text{np}}$ ). Compounds marked in boldface were finally selected for experimental screening.

| #  | ZINC ID                 | $\Delta G_{\text{bind}}$ | <i>std</i> | $\Delta E_{\text{vdW}}$ | <i>std</i> | $\Delta E_{\text{el}}$ | <i>std</i> | $\Delta G_{\text{pol}}$ | <i>std</i> | $\Delta G_{\text{np}}$ | <i>std</i> |
|----|-------------------------|--------------------------|------------|-------------------------|------------|------------------------|------------|-------------------------|------------|------------------------|------------|
| 1  | ZINC000257317306        | -61.7                    | 3.4        | -50.1                   | 2.8        | -41.5                  | 3.3        | 34.4                    | 2.5        | -4.5                   | 0.1        |
| 2  | <b>ZINC000035869910</b> | <b>-59.9</b>             | <b>3.9</b> | <b>-54.6</b>            | <b>2.6</b> | <b>-35.5</b>           | <b>5.1</b> | <b>34.9</b>             | <b>2.9</b> | <b>-4.7</b>            | <b>0.1</b> |
| 3  | <b>ZINC000069778215</b> | <b>-56.4</b>             | <b>3.8</b> | <b>-47.6</b>            | <b>2.7</b> | <b>-41.7</b>           | <b>4.2</b> | <b>37.2</b>             | <b>2.8</b> | <b>-4.4</b>            | <b>0.1</b> |
| 4  | <b>ZINC000023642159</b> | <b>-56.4</b>             | <b>3.4</b> | <b>-47.6</b>            | <b>2.3</b> | <b>-27.5</b>           | <b>4.0</b> | <b>22.8</b>             | <b>2.5</b> | <b>-4.0</b>            | <b>0.1</b> |
| 5  | ZINC000096058349        | -55.7                    | 3.2        | -54.1                   | 2.4        | -18.0                  | 2.3        | 20.9                    | 2.2        | -4.5                   | 0.1        |
| 6  | ZINC000096158052        | -55.4                    | 3.3        | -49.9                   | 2.5        | -20.8                  | 3.8        | 19.6                    | 3.0        | -4.3                   | 0.1        |
| 7  | <b>ZINC000091270543</b> | <b>-53.9</b>             | <b>3.0</b> | <b>-53.6</b>            | <b>3.0</b> | <b>-23.0</b>           | <b>3.8</b> | <b>27.5</b>             | <b>2.3</b> | <b>-4.7</b>            | <b>0.1</b> |
| 8  | ZINC000257211885        | -53.7                    | 5.5        | -50.3                   | 3.9        | -20.9                  | 3.8        | 21.5                    | 3.1        | -3.9                   | 0.1        |
| 9  | ZINC000278659999        | -52.4                    | 3.4        | -47.8                   | 2.4        | -23.5                  | 3.5        | 23.1                    | 2.4        | -4.2                   | 0.1        |
| 10 | <b>ZINC000008595944</b> | <b>-52.4</b>             | <b>3.2</b> | <b>-53.1</b>            | <b>2.3</b> | <b>-13.8</b>           | <b>4.1</b> | <b>18.6</b>             | <b>3.6</b> | <b>-4.1</b>            | <b>0.1</b> |
| 11 | ZINC000096251709        | -52.2                    | 3.5        | -48.0                   | 2.1        | -19.0                  | 3.2        | 18.8                    | 2.2        | -4.0                   | 0.1        |
| 12 | ZINC000091486946        | -52.0                    | 2.8        | -52.4                   | 2.6        | -21.0                  | 2.8        | 26.0                    | 2.7        | -4.6                   | 0.1        |
| 13 | ZINC000409428381        | -51.9                    | 3.8        | -51.5                   | 2.4        | -12.1                  | 4.9        | 16.4                    | 3.1        | -4.6                   | 0.1        |
| 14 | ZINC000065395709        | -51.5                    | 3.0        | -51.6                   | 2.4        | -22.5                  | 3.1        | 27.1                    | 2.0        | -4.6                   | 0.1        |
| 15 | <b>ZINC000003463362</b> | <b>-51.5</b>             | <b>3.4</b> | <b>-50.0</b>            | <b>2.8</b> | <b>-30.9</b>           | <b>4.2</b> | <b>33.8</b>             | <b>2.5</b> | <b>-4.4</b>            | <b>0.1</b> |
| 16 | ZINC000075530913        | -51.0                    | 2.5        | -49.2                   | 2.3        | -20.1                  | 2.3        | 22.5                    | 1.8        | -4.3                   | 0.1        |
| 17 | <b>ZINC000091486133</b> | <b>-50.6</b>             | <b>3.1</b> | <b>-52.7</b>            | <b>2.9</b> | <b>-25.7</b>           | <b>3.2</b> | <b>32.4</b>             | <b>2.2</b> | <b>-4.6</b>            | <b>0.1</b> |
| 18 | ZINC000257218603        | -50.6                    | 3.4        | -50.2                   | 2.5        | -24.7                  | 5.1        | 28.8                    | 3.5        | -4.5                   | 0.1        |
| 19 | <b>ZINC000008913866</b> | <b>-50.6</b>             | <b>3.5</b> | <b>-50.7</b>            | <b>2.5</b> | <b>-29.7</b>           | <b>6.1</b> | <b>34.2</b>             | <b>4.4</b> | <b>-4.4</b>            | <b>0.1</b> |
| 20 | ZINC000003641308        | -50.2                    | 6.8        | -45.0                   | 2.6        | -25.1                  | 7.2        | 23.9                    | 3.5        | -4.0                   | 0.1        |
| 21 | ZINC000057731402        | -50.0                    | 3.3        | -51.2                   | 2.6        | -25.6                  | 3.7        | 31.1                    | 2.1        | -4.4                   | 0.1        |
| 22 | ZINC000096251711        | -49.9                    | 4.0        | -50.9                   | 3.0        | -15.0                  | 3.5        | 20.4                    | 2.4        | -4.3                   | 0.1        |
| 23 | ZINC000092022499        | -49.8                    | 2.6        | -53.4                   | 2.6        | -23.3                  | 2.6        | 31.4                    | 2.0        | -4.6                   | 0.1        |
| 24 | <b>ZINC000022191233</b> | <b>-49.4</b>             | <b>3.0</b> | <b>-53.6</b>            | <b>2.9</b> | <b>-31.4</b>           | <b>3.7</b> | <b>40.2</b>             | <b>2.8</b> | <b>-4.6</b>            | <b>0.1</b> |
| 25 | ZINC000170800517        | -49.3                    | 2.8        | -49.4                   | 2.4        | -18.6                  | 2.4        | 23.3                    | 2.1        | -4.5                   | 0.1        |
| 26 | ZINC000007030710        | -48.9                    | 3.7        | -47.3                   | 2.7        | -25.7                  | 4.3        | 28.0                    | 3.1        | -3.9                   | 0.1        |
| 27 | ZINC000091270544        | -48.9                    | 3.0        | -52.4                   | 2.7        | -22.2                  | 3.8        | 30.3                    | 2.6        | -4.5                   | 0.1        |
| 28 | <b>ZINC000084578820</b> | <b>-48.8</b>             | <b>3.6</b> | <b>-47.8</b>            | <b>2.6</b> | <b>-35.8</b>           | <b>7.0</b> | <b>39.0</b>             | <b>3.7</b> | <b>-4.1</b>            | <b>0.1</b> |
| 29 | ZINC000072290753        | -48.8                    | 4.0        | -52.3                   | 2.4        | -25.4                  | 4.1        | 33.2                    | 3.3        | -4.2                   | 0.1        |
| 30 | <b>ZINC000015078577</b> | <b>-48.7</b>             | <b>3.4</b> | <b>-49.4</b>            | <b>2.8</b> | <b>-29.5</b>           | <b>4.6</b> | <b>34.7</b>             | <b>3.2</b> | <b>-4.4</b>            | <b>0.1</b> |
| 31 | <b>ZINC000010256259</b> | <b>-48.6</b>             | <b>3.3</b> | <b>-52.7</b>            | <b>2.7</b> | <b>-42.1</b>           | <b>3.7</b> | <b>50.7</b>             | <b>3.1</b> | <b>-4.5</b>            | <b>0.1</b> |
| 32 | ZINC000077503523        | -48.4                    | 3.3        | -45.1                   | 2.9        | -34.1                  | 6.6        | 34.7                    | 4.8        | -4.0                   | 0.1        |
| 33 | ZINC000019328346        | -48.3                    | 8.8        | -46.7                   | 4.6        | -22.0                  | 4.6        | 24.5                    | 3.0        | -4.1                   | 0.1        |
| 34 | ZINC000003875380        | -48.2                    | 2.6        | -46.6                   | 1.9        | -16.5                  | 2.0        | 18.2                    | 2.2        | -3.4                   | 0.1        |
| 35 | <b>ZINC000095415912</b> | <b>-48.2</b>             | <b>3.5</b> | <b>-53.2</b>            | <b>2.7</b> | <b>-28.4</b>           | <b>4.2</b> | <b>37.7</b>             | <b>2.7</b> | <b>-4.4</b>            | <b>0.1</b> |
| 36 | ZINC000092065700        | -48.1                    | 2.9        | -52.6                   | 2.5        | -19.7                  | 2.9        | 28.5                    | 2.3        | -4.3                   | 0.1        |
| 37 | ZINC000095950700        | -48.0                    | 2.7        | -48.8                   | 2.7        | -19.6                  | 2.1        | 24.7                    | 2.2        | -4.2                   | 0.1        |
| 38 | ZINC000257222272        | -47.9                    | 3.1        | -51.4                   | 2.2        | -7.4                   | 2.0        | 15.2                    | 2.1        | -4.4                   | 0.1        |

| #         | ZINC ID                 | $\Delta G_{\text{bind}}$ | <i>std</i> | $\Delta E_{\text{vdW}}$ | <i>std</i> | $\Delta E_{\text{el}}$ | <i>std</i> | $\Delta G_{\text{pol}}$ | <i>std</i> | $\Delta G_{\text{np}}$ | <i>std</i> |
|-----------|-------------------------|--------------------------|------------|-------------------------|------------|------------------------|------------|-------------------------|------------|------------------------|------------|
| 39        | ZINC000096238948        | -47.8                    | 4.3        | -53.8                   | 2.7        | -14.2                  | 5.3        | 24.6                    | 3.2        | -4.3                   | 0.2        |
| <b>40</b> | <b>ZINC000095410774</b> | <b>-47.5</b>             | <b>2.9</b> | <b>-50.5</b>            | <b>2.4</b> | <b>-24.2</b>           | <b>3.1</b> | <b>31.4</b>             | <b>2.6</b> | <b>-4.2</b>            | <b>0.1</b> |
| 41        | ZINC000100737122        | -47.4                    | 3.0        | -52.3                   | 2.5        | -22.6                  | 3.1        | 31.8                    | 2.9        | -4.3                   | 0.1        |
| 42        | ZINC000257299555        | -47.4                    | 2.9        | -46.7                   | 3.1        | -38.1                  | 4.3        | 41.7                    | 3.4        | -4.3                   | 0.1        |
| 43        | ZINC000002465084        | -47.0                    | 4.2        | -49.8                   | 2.5        | -23.0                  | 3.3        | 30.1                    | 2.9        | -4.2                   | 0.1        |
| <b>44</b> | <b>ZINC000004998502</b> | <b>-47.0</b>             | <b>3.4</b> | <b>-53.5</b>            | <b>3.3</b> | <b>-39.4</b>           | <b>4.2</b> | <b>50.3</b>             | <b>3.0</b> | <b>-4.4</b>            | <b>0.1</b> |
| <b>45</b> | <b>ZINC000000333210</b> | <b>-46.9</b>             | <b>3.0</b> | <b>-50.6</b>            | <b>3.0</b> | <b>-32.6</b>           | <b>3.7</b> | <b>40.5</b>             | <b>2.5</b> | <b>-4.3</b>            | <b>0.1</b> |
| 46        | ZINC000091768990        | -46.8                    | 2.7        | -52.4                   | 2.8        | -14.9                  | 2.6        | 24.8                    | 2.2        | -4.4                   | 0.1        |
| 47        | ZINC000229623928        | -46.8                    | 2.9        | -50.6                   | 2.5        | -33.6                  | 3.7        | 41.9                    | 3.2        | -4.4                   | 0.1        |
| <b>48</b> | <b>ZINC000057563200</b> | <b>-46.8</b>             | <b>3.4</b> | <b>-49.9</b>            | <b>2.7</b> | <b>-17.6</b>           | <b>4.6</b> | <b>24.9</b>             | <b>2.4</b> | <b>-4.1</b>            | <b>0.1</b> |
| <b>49</b> | <b>ZINC000002216953</b> | <b>-46.7</b>             | <b>2.8</b> | <b>-48.7</b>            | <b>2.4</b> | <b>-24.8</b>           | <b>3.2</b> | <b>31.0</b>             | <b>2.7</b> | <b>-4.3</b>            | <b>0.1</b> |
| 50        | ZINC000034895992        | -46.7                    | 3.5        | -49.7                   | 2.7        | -29.8                  | 3.4        | 37.1                    | 3.0        | -4.3                   | 0.1        |
| 51        | ZINC000334160460        | -46.7                    | 2.9        | -49.1                   | 2.5        | -22.9                  | 2.9        | 29.6                    | 2.1        | -4.2                   | 0.1        |
| 52        | ZINC000097201269        | -46.5                    | 3.7        | -49.4                   | 2.6        | -17.3                  | 4.2        | 24.7                    | 3.0        | -4.4                   | 0.2        |
| 53        | ZINC000091304527        | -46.3                    | 3.2        | -50.9                   | 2.5        | -14.3                  | 4.5        | 23.2                    | 3.0        | -4.3                   | 0.2        |
| 54        | ZINC000009338249        | -46.3                    | 3.9        | -47.0                   | 2.5        | -27.3                  | 4.7        | 31.9                    | 2.9        | -3.9                   | 0.1        |
| 55        | ZINC000071746202        | -46.2                    | 3.7        | -47.6                   | 2.6        | -14.6                  | 3.6        | 20.3                    | 2.9        | -4.2                   | 0.1        |
| 56        | ZINC000194368147        | -46.1                    | 3.2        | -48.3                   | 2.8        | -31.3                  | 3.5        | 37.9                    | 2.4        | -4.4                   | 0.1        |
| 57        | ZINC000097413355        | -45.9                    | 2.4        | -46.7                   | 2.6        | -27.2                  | 3.2        | 31.9                    | 2.6        | -3.9                   | 0.1        |
| <b>58</b> | <b>ZINC000084598177</b> | <b>-45.9</b>             | <b>2.8</b> | <b>-49.0</b>            | <b>2.5</b> | <b>-29.0</b>           | <b>3.2</b> | <b>36.1</b>             | <b>2.6</b> | <b>-4.0</b>            | <b>0.1</b> |
| 59        | ZINC000012323932        | -45.8                    | 4.1        | -42.7                   | 3.2        | -38.4                  | 7.2        | 39.1                    | 3.4        | -3.9                   | 0.1        |
| 60        | ZINC000096199614        | -45.8                    | 3.2        | -51.3                   | 2.5        | -28.0                  | 3.7        | 37.5                    | 2.3        | -3.9                   | 0.1        |
| 61        | ZINC000225746732        | -45.7                    | 2.4        | -47.5                   | 2.3        | -21.3                  | 2.3        | 26.9                    | 2.2        | -3.8                   | 0.1        |
| 62        | ZINC000257310083        | -45.7                    | 3.3        | -47.2                   | 2.6        | -17.0                  | 2.4        | 22.2                    | 2.0        | -3.7                   | 0.1        |
| <b>63</b> | <b>ZINC000025032259</b> | <b>-45.7</b>             | <b>3.2</b> | <b>-54.4</b>            | <b>2.7</b> | <b>-22.2</b>           | <b>3.2</b> | <b>35.4</b>             | <b>2.6</b> | <b>-4.5</b>            | <b>0.1</b> |
| <b>64</b> | <b>ZINC000069562405</b> | <b>-45.0</b>             | <b>2.8</b> | <b>-47.4</b>            | <b>2.6</b> | <b>-27.1</b>           | <b>2.9</b> | <b>33.5</b>             | <b>2.4</b> | <b>-4.1</b>            | <b>0.1</b> |
| 65        | ZINC000306141880        | -45.0                    | 2.8        | -46.5                   | 2.8        | -29.4                  | 4.2        | 35.0                    | 2.7        | -4.2                   | 0.1        |
| 66        | ZINC000096069207        | -45.0                    | 3.5        | -52.2                   | 2.8        | -19.5                  | 2.9        | 31.1                    | 2.5        | -4.5                   | 0.1        |
| <b>67</b> | <b>ZINC000051467674</b> | <b>-44.9</b>             | <b>3.0</b> | <b>-46.6</b>            | <b>2.7</b> | <b>-40.1</b>           | <b>3.8</b> | <b>46.2</b>             | <b>2.6</b> | <b>-4.4</b>            | <b>0.1</b> |
| 68        | ZINC000575618196        | -44.9                    | 3.2        | -54.5                   | 2.7        | -27.3                  | 3.9        | 41.4                    | 2.7        | -4.5                   | 0.1        |
| 69        | ZINC000012142783        | -44.9                    | 4.2        | -51.0                   | 2.5        | -22.0                  | 5.0        | 32.4                    | 5.1        | -4.3                   | 0.1        |
| 70        | ZINC000257206611        | -44.6                    | 3.1        | -55.3                   | 3.1        | -11.5                  | 5.7        | 26.6                    | 3.9        | -4.4                   | 0.1        |
| 71        | ZINC000013692677        | -44.5                    | 3.9        | -51.9                   | 3.1        | -30.2                  | 4.7        | 42.1                    | 3.3        | -4.6                   | 0.1        |
| 72        | ZINC000040473994        | -44.5                    | 2.8        | -49.6                   | 2.8        | -26.5                  | 4.0        | 35.6                    | 2.4        | -4.1                   | 0.1        |
| 73        | ZINC000238121810        | -44.4                    | 4.5        | -37.2                   | 2.9        | -110.9                 | 10.4       | 107.9                   | 8.3        | -4.1                   | 0.1        |
| 74        | ZINC000257192562        | -44.4                    | 2.3        | -45.9                   | 2.2        | -17.6                  | 2.3        | 23.3                    | 2.0        | -4.1                   | 0.1        |
| 75        | ZINC000065248686        | -44.2                    | 2.7        | -45.7                   | 2.6        | -14.8                  | 2.7        | 20.4                    | 1.9        | -4.1                   | 0.1        |
| 76        | ZINC000092078469        | -43.7                    | 4.6        | -45.0                   | 3.2        | -24.1                  | 3.6        | 29.1                    | 3.5        | -3.8                   | 0.2        |
| <b>77</b> | <b>ZINC000079491038</b> | <b>-43.5</b>             | <b>3.3</b> | <b>-51.3</b>            | <b>2.7</b> | <b>-28.2</b>           | <b>5.1</b> | <b>40.5</b>             | <b>4.0</b> | <b>-4.5</b>            | <b>0.1</b> |
| 78        | ZINC000089827813        | -43.5                    | 3.4        | -46.6                   | 3.2        | -29.5                  | 4.7        | 36.6                    | 2.9        | -4.0                   | 0.1        |
| 79        | ZINC000225489282        | -43.4                    | 2.9        | -49.8                   | 2.4        | -17.0                  | 4.8        | 27.6                    | 3.9        | -4.2                   | 0.1        |
| 80        | ZINC000330033487        | -43.4                    | 4.3        | -50.1                   | 2.6        | -15.4                  | 4.4        | 26.4                    | 2.8        | -4.3                   | 0.1        |
| 81        | ZINC000195547314        | -43.2                    | 3.1        | -50.9                   | 2.8        | -14.0                  | 3.2        | 26.1                    | 2.1        | -4.3                   | 0.1        |
| 82        | ZINC000328587242        | -43.1                    | 2.5        | -45.2                   | 2.7        | -24.8                  | 2.6        | 31.1                    | 2.0        | -4.2                   | 0.1        |
| 83        | ZINC000000489138        | -43.0                    | 3.1        | -50.3                   | 2.3        | -20.1                  | 2.9        | 31.6                    | 2.0        | -4.2                   | 0.1        |
| 84        | ZINC000092760184        | -42.9                    | 2.8        | -47.5                   | 2.4        | -20.6                  | 3.3        | 29.5                    | 2.6        | -4.3                   | 0.1        |

| #          | ZINC ID                 | $\Delta G_{\text{bind}}$ | <i>std</i> | $\Delta E_{\text{vdW}}$ | <i>std</i> | $\Delta E_{\text{el}}$ | <i>std</i> | $\Delta G_{\text{pol}}$ | <i>std</i> | $\Delta G_{\text{np}}$ | <i>std</i> |
|------------|-------------------------|--------------------------|------------|-------------------------|------------|------------------------|------------|-------------------------|------------|------------------------|------------|
| 85         | ZINC000257256038        | -42.9                    | 2.7        | -45.9                   | 2.4        | -25.3                  | 3.1        | 32.6                    | 1.9        | -4.3                   | 0.1        |
| 86         | ZINC000100193536        | -42.9                    | 2.8        | -48.7                   | 2.9        | -15.8                  | 2.9        | 25.5                    | 2.2        | -3.8                   | 0.1        |
| <b>87</b>  | <b>ZINC000071915224</b> | <b>-42.8</b>             | <b>2.7</b> | <b>-49.3</b>            | <b>2.3</b> | <b>-26.5</b>           | <b>3.5</b> | <b>37.1</b>             | <b>2.8</b> | <b>-4.1</b>            | <b>0.1</b> |
| 88         | ZINC000230113696        | -42.7                    | 3.0        | -52.9                   | 2.8        | -23.6                  | 4.3        | 38.1                    | 3.8        | -4.3                   | 0.1        |
| 89         | ZINC000072300733        | -42.7                    | 4.6        | -51.3                   | 2.7        | -13.5                  | 4.4        | 26.4                    | 3.2        | -4.3                   | 0.1        |
| 90         | ZINC000071282106        | -42.6                    | 4.0        | -47.7                   | 2.6        | -16.3                  | 4.9        | 25.7                    | 2.4        | -4.3                   | 0.1        |
| <b>91</b>  | <b>ZINC000005360885</b> | <b>-42.6</b>             | <b>3.7</b> | <b>-48.1</b>            | <b>2.7</b> | <b>-36.1</b>           | <b>4.9</b> | <b>45.4</b>             | <b>2.3</b> | <b>-3.9</b>            | <b>0.1</b> |
| 92         | ZINC000100193430        | -42.6                    | 2.3        | -47.9                   | 2.4        | -14.3                  | 2.6        | 23.3                    | 1.9        | -3.7                   | 0.1        |
| 93         | ZINC000012550491        | -42.6                    | 2.9        | -46.4                   | 2.6        | -24.3                  | 3.5        | 32.1                    | 2.5        | -4.0                   | 0.1        |
| 94         | ZINC000072096437        | -42.6                    | 2.8        | -50.9                   | 2.4        | -18.7                  | 4.2        | 31.6                    | 2.7        | -4.6                   | 0.1        |
| <b>95</b>  | <b>ZINC000244816835</b> | <b>-42.6</b>             | <b>3.1</b> | <b>-43.8</b>            | <b>3.0</b> | <b>-34.4</b>           | <b>3.6</b> | <b>39.7</b>             | <b>2.1</b> | <b>-4.1</b>            | <b>0.1</b> |
| 96         | ZINC000065463577        | -42.5                    | 2.8        | -46.6                   | 2.7        | -31.9                  | 5.2        | 40.2                    | 4.8        | -4.1                   | 0.1        |
| 97         | ZINC000002750765        | -42.5                    | 2.8        | -45.0                   | 2.4        | -24.2                  | 2.9        | 30.9                    | 2.7        | -4.2                   | 0.1        |
| 98         | ZINC000075118384        | -42.3                    | 3.9        | -46.9                   | 2.9        | -33.1                  | 7.3        | 41.8                    | 4.1        | -4.1                   | 0.1        |
| <b>99</b>  | <b>ZINC000223692657</b> | <b>-42.2</b>             | <b>2.9</b> | <b>-50.8</b>            | <b>2.6</b> | <b>-28.2</b>           | <b>3.9</b> | <b>40.9</b>             | <b>2.7</b> | <b>-4.2</b>            | <b>0.1</b> |
| 100        | ZINC000069846908        | -42.2                    | 3.8        | -50.0                   | 3.0        | -33.3                  | 7.7        | 45.3                    | 5.0        | -4.2                   | 0.1        |
| <b>101</b> | <b>ZINC000069737923</b> | <b>-42.1</b>             | <b>3.1</b> | <b>-46.3</b>            | <b>2.3</b> | <b>-30.1</b>           | <b>4.0</b> | <b>38.6</b>             | <b>2.8</b> | <b>-4.3</b>            | <b>0.1</b> |
| <b>102</b> | <b>ZINC000018148904</b> | <b>-42.1</b>             | <b>2.9</b> | <b>-50.1</b>            | <b>2.6</b> | <b>-32.4</b>           | <b>3.5</b> | <b>44.5</b>             | <b>2.6</b> | <b>-4.1</b>            | <b>0.1</b> |
| 103        | ZINC000013691850        | -42.0                    | 2.6        | -49.9                   | 2.5        | -15.3                  | 3.3        | 27.2                    | 2.0        | -3.9                   | 0.1        |
| 104        | ZINC000095393415        | -41.9                    | 2.9        | -54.8                   | 2.5        | -14.4                  | 3.2        | 31.2                    | 2.8        | -4.0                   | 0.1        |
| 105        | ZINC000011781217        | -41.8                    | 3.2        | -52.0                   | 2.2        | -13.7                  | 2.4        | 28.3                    | 2.1        | -4.3                   | 0.1        |
| 106        | ZINC000091664087        | -41.7                    | 3.2        | -54.4                   | 2.3        | -8.4                   | 3.4        | 25.6                    | 2.4        | -4.5                   | 0.1        |
| 107        | ZINC000003292603        | -41.7                    | 3.5        | -47.2                   | 2.4        | -19.2                  | 3.7        | 28.9                    | 3.0        | -4.2                   | 0.1        |
| 108        | ZINC000013691849        | -41.6                    | 4.0        | -44.2                   | 3.0        | -33.9                  | 4.8        | 40.5                    | 2.7        | -3.9                   | 0.1        |
| 109        | ZINC000003438521        | -41.6                    | 2.7        | -45.4                   | 2.3        | -24.1                  | 4.5        | 31.8                    | 2.9        | -3.9                   | 0.1        |
| 110        | ZINC000096024249        | -41.5                    | 3.4        | -47.4                   | 2.4        | -17.8                  | 5.0        | 27.4                    | 3.4        | -3.7                   | 0.1        |
| 111        | ZINC000022067509        | -41.5                    | 4.6        | -49.1                   | 2.8        | -56.9                  | 11.1       | 68.7                    | 8.5        | -4.2                   | 0.1        |
| 112        | ZINC000216315534        | -41.4                    | 2.9        | -41.9                   | 2.5        | -28.6                  | 4.7        | 32.9                    | 4.0        | -3.9                   | 0.1        |
| 113        | ZINC000238886413        | -41.3                    | 4.0        | -49.4                   | 2.7        | -11.3                  | 3.3        | 23.5                    | 2.3        | -4.1                   | 0.1        |
| 114        | ZINC000096003964        | -41.3                    | 4.1        | -49.1                   | 2.6        | -26.9                  | 4.8        | 38.8                    | 2.6        | -4.1                   | 0.1        |
| 115        | ZINC000040060202        | -41.3                    | 3.5        | -46.1                   | 2.8        | -17.7                  | 3.4        | 26.6                    | 2.0        | -4.1                   | 0.1        |
| 116        | ZINC000095503625        | -41.1                    | 3.5        | -50.6                   | 2.6        | -24.3                  | 4.9        | 38.3                    | 3.3        | -4.6                   | 0.1        |
| 117        | ZINC000092021781        | -41.1                    | 3.4        | -49.3                   | 2.9        | -21.9                  | 5.0        | 34.4                    | 2.9        | -4.2                   | 0.1        |
| <b>118</b> | <b>ZINC000043550595</b> | <b>-41.1</b>             | <b>2.9</b> | <b>-48.3</b>            | <b>2.5</b> | <b>-29.1</b>           | <b>3.4</b> | <b>40.5</b>             | <b>2.0</b> | <b>-4.3</b>            | <b>0.1</b> |
| 119        | ZINC000107713021        | -41.0                    | 3.0        | -44.7                   | 2.2        | -3.4                   | 2.9        | 11.1                    | 3.1        | -4.0                   | 0.1        |
| 120        | ZINC000257270100        | -41.0                    | 4.5        | -46.1                   | 2.5        | -11.5                  | 2.9        | 20.6                    | 3.4        | -4.1                   | 0.1        |
| 121        | ZINC000005426253        | -40.9                    | 2.9        | -49.8                   | 2.4        | -12.6                  | 3.2        | 26.1                    | 3.7        | -4.5                   | 0.1        |
| 122        | ZINC000044874685        | -40.9                    | 3.1        | -44.2                   | 2.8        | -24.3                  | 4.6        | 31.6                    | 3.6        | -4.0                   | 0.1        |
| 123        | ZINC000004722089        | -40.7                    | 2.3        | -48.1                   | 2.5        | -14.7                  | 2.7        | 25.8                    | 1.8        | -3.7                   | 0.1        |
| 124        | ZINC000014741626        | -40.6                    | 2.6        | -49.6                   | 2.2        | -7.1                   | 2.5        | 20.1                    | 2.5        | -4.0                   | 0.1        |
| 125        | ZINC000069595091        | -40.6                    | 3.4        | -45.8                   | 2.8        | -22.3                  | 3.9        | 31.6                    | 3.0        | -4.2                   | 0.1        |
| 126        | ZINC000003327891        | -40.5                    | 2.6        | -45.9                   | 2.2        | -11.5                  | 2.2        | 20.8                    | 2.0        | -4.0                   | 0.1        |
| 127        | ZINC000100119126        | -40.5                    | 3.4        | -47.3                   | 2.8        | -19.9                  | 4.3        | 30.9                    | 3.4        | -4.2                   | 0.1        |
| 128        | ZINC000071754931        | -40.4                    | 2.8        | -40.8                   | 2.3        | -12.7                  | 3.3        | 16.9                    | 2.0        | -3.8                   | 0.1        |
| 129        | ZINC000069349055        | -40.4                    | 3.5        | -48.3                   | 3.0        | -24.4                  | 8.4        | 36.7                    | 5.7        | -4.3                   | 0.1        |
| 130        | ZINC000096010936        | -40.4                    | 3.1        | -41.4                   | 2.8        | -27.6                  | 3.2        | 32.7                    | 2.3        | -4.1                   | 0.1        |

| #          | ZINC ID                 | $\Delta G_{\text{bind}}$ | <i>std</i> | $\Delta E_{\text{vdW}}$ | <i>std</i> | $\Delta E_{\text{el}}$ | <i>std</i> | $\Delta G_{\text{pol}}$ | <i>std</i> | $\Delta G_{\text{np}}$ | <i>std</i> |
|------------|-------------------------|--------------------------|------------|-------------------------|------------|------------------------|------------|-------------------------|------------|------------------------|------------|
| 131        | ZINC000014791001        | -40.3                    | 2.9        | -47.0                   | 2.3        | -21.6                  | 3.5        | 32.5                    | 3.1        | -4.3                   | 0.1        |
| 132        | ZINC000100191495        | -40.3                    | 2.8        | -46.6                   | 2.6        | -14.5                  | 2.6        | 24.6                    | 2.0        | -3.7                   | 0.1        |
| <b>133</b> | <b>ZINC000004511530</b> | <b>-40.3</b>             | <b>2.6</b> | <b>-49.2</b>            | <b>2.1</b> | <b>-22.4</b>           | <b>3.0</b> | <b>35.7</b>             | <b>2.3</b> | <b>-4.3</b>            | <b>0.1</b> |
| 134        | ZINC000002646979        | -40.2                    | 2.7        | -51.5                   | 2.3        | -22.4                  | 3.2        | 38.0                    | 2.7        | -4.3                   | 0.1        |
| 135        | ZINC000071497775        | -40.2                    | 3.3        | -51.3                   | 2.3        | -25.4                  | 6.6        | 41.0                    | 5.0        | -4.5                   | 0.1        |
| 136        | ZINC000022549345        | -40.2                    | 2.2        | -53.9                   | 2.1        | -16.6                  | 3.8        | 34.3                    | 3.8        | -4.1                   | 0.1        |
| 137        | ZINC000585280336        | -40.1                    | 4.5        | -51.7                   | 2.3        | -29.6                  | 5.8        | 45.5                    | 3.3        | -4.3                   | 0.1        |
| 138        | ZINC000005026046        | -40.1                    | 3.3        | -45.8                   | 2.3        | -14.0                  | 2.7        | 23.6                    | 2.1        | -3.9                   | 0.1        |
| 139        | ZINC000035398834        | -40.1                    | 2.4        | -51.5                   | 2.3        | -8.9                   | 2.5        | 24.5                    | 2.1        | -4.1                   | 0.1        |
| 140        | ZINC000072896859        | -40.0                    | 3.2        | -48.3                   | 2.6        | -6.4                   | 5.0        | 18.8                    | 5.1        | -4.2                   | 0.1        |
| 141        | ZINC000072290711        | -39.9                    | 2.6        | -46.7                   | 2.9        | -17.3                  | 3.3        | 27.8                    | 2.4        | -3.7                   | 0.1        |
| 142        | ZINC000064871452        | -39.9                    | 3.4        | -49.9                   | 2.5        | -26.3                  | 7.2        | 40.5                    | 5.2        | -4.3                   | 0.1        |
| 143        | ZINC000050584912        | -39.8                    | 3.3        | -50.3                   | 2.8        | -6.7                   | 3.9        | 21.3                    | 3.7        | -4.2                   | 0.2        |
| 144        | ZINC000067460397        | -39.8                    | 2.7        | -50.1                   | 2.2        | -34.7                  | 3.6        | 49.0                    | 2.8        | -4.0                   | 0.1        |
| 145        | ZINC000040386093        | -39.8                    | 3.1        | -45.0                   | 2.7        | -14.5                  | 3.0        | 23.6                    | 2.9        | -3.8                   | 0.1        |
| 146        | ZINC000067643674        | -39.7                    | 2.7        | -44.8                   | 2.5        | -25.4                  | 4.2        | 34.2                    | 2.4        | -3.7                   | 0.1        |
| 147        | ZINC000065167646        | -39.6                    | 3.6        | -47.8                   | 2.7        | -22.4                  | 4.0        | 34.7                    | 3.9        | -4.1                   | 0.1        |
| 148        | ZINC000008738218        | -39.6                    | 3.3        | -41.0                   | 2.9        | -41.3                  | 5.6        | 46.7                    | 3.1        | -3.9                   | 0.1        |
| 149        | ZINC000079001413        | -39.4                    | 2.6        | -52.9                   | 2.5        | -9.0                   | 2.5        | 26.8                    | 2.1        | -4.3                   | 0.1        |
| <b>150</b> | <b>ZINC000044919578</b> | <b>-39.4</b>             | <b>2.5</b> | <b>-43.0</b>            | <b>2.1</b> | <b>-29.3</b>           | <b>3.4</b> | <b>36.7</b>             | <b>2.1</b> | <b>-3.8</b>            | <b>0.1</b> |
| 151        | ZINC000013973188        | -39.3                    | 2.7        | -47.2                   | 2.5        | -29.0                  | 3.6        | 41.1                    | 2.8        | -4.2                   | 0.1        |
| 152        | ZINC000007030648        | -39.3                    | 4.1        | -43.3                   | 2.9        | -21.2                  | 7.0        | 28.7                    | 3.2        | -3.5                   | 0.2        |
| 153        | ZINC000135810445        | -39.1                    | 3.3        | -44.5                   | 2.6        | -33.4                  | 5.4        | 42.9                    | 3.5        | -4.1                   | 0.1        |
| 154        | ZINC000002922856        | -39.1                    | 3.2        | -52.4                   | 2.7        | -15.2                  | 3.6        | 32.8                    | 2.9        | -4.3                   | 0.1        |
| 155        | ZINC000096080454        | -39.1                    | 2.8        | -44.4                   | 2.3        | -19.0                  | 2.8        | 28.2                    | 2.4        | -3.9                   | 0.1        |
| <b>156</b> | <b>ZINC000240454699</b> | <b>-39.0</b>             | <b>2.7</b> | <b>-42.5</b>            | <b>2.5</b> | <b>-25.1</b>           | <b>4.6</b> | <b>32.7</b>             | <b>3.4</b> | <b>-4.0</b>            | <b>0.1</b> |
| 157        | ZINC000095402766        | -39.0                    | 4.6        | -44.9                   | 2.5        | -17.6                  | 7.1        | 27.6                    | 3.4        | -4.1                   | 0.1        |
| 158        | ZINC000008316344        | -39.0                    | 2.5        | -51.0                   | 2.4        | -5.6                   | 2.6        | 21.7                    | 2.4        | -4.1                   | 0.1        |
| 159        | ZINC000084686490        | -38.9                    | 2.6        | -46.1                   | 2.4        | -33.4                  | 3.0        | 44.8                    | 2.2        | -4.2                   | 0.1        |
| 160        | ZINC000253433259        | -38.9                    | 2.7        | -49.1                   | 2.2        | -19.7                  | 2.8        | 33.9                    | 2.6        | -4.0                   | 0.1        |
| 161        | ZINC000584887110        | -38.9                    | 2.5        | -46.9                   | 2.2        | -13.7                  | 2.9        | 25.7                    | 2.4        | -4.0                   | 0.1        |
| 162        | ZINC000012888207        | -38.8                    | 2.3        | -40.8                   | 2.2        | -27.7                  | 3.4        | 33.2                    | 2.3        | -3.5                   | 0.1        |
| 163        | ZINC000014240188        | -38.8                    | 2.8        | -45.7                   | 2.8        | -19.3                  | 4.2        | 30.2                    | 3.5        | -4.0                   | 0.1        |
| 164        | ZINC000069775761        | -38.7                    | 4.1        | -48.1                   | 2.6        | -21.4                  | 4.1        | 34.9                    | 2.2        | -4.1                   | 0.1        |
| 165        | ZINC000096069697        | -38.7                    | 4.5        | -45.5                   | 2.3        | -9.5                   | 5.4        | 20.3                    | 3.0        | -3.9                   | 0.2        |
| 166        | ZINC000154455008        | -38.7                    | 4.0        | -44.9                   | 2.8        | -15.4                  | 6.2        | 25.7                    | 2.7        | -4.0                   | 0.1        |
| 167        | ZINC000010218408        | -38.6                    | 4.3        | -47.3                   | 2.8        | -19.0                  | 5.6        | 31.4                    | 3.8        | -3.7                   | 0.2        |
| 168        | ZINC000050859891        | -38.6                    | 3.6        | -48.4                   | 2.6        | -28.7                  | 4.7        | 42.6                    | 3.9        | -4.1                   | 0.1        |
| 169        | ZINC000072290626        | -38.6                    | 2.9        | -48.7                   | 2.2        | -18.8                  | 5.2        | 32.8                    | 4.7        | -4.0                   | 0.1        |
| 170        | ZINC000069492530        | -38.5                    | 3.0        | -47.5                   | 2.6        | -19.0                  | 3.3        | 31.8                    | 2.1        | -3.8                   | 0.1        |
| 171        | ZINC000005348603        | -38.5                    | 3.1        | -46.3                   | 2.6        | -9.9                   | 4.8        | 21.7                    | 3.3        | -4.1                   | 0.1        |
| 172        | ZINC000052955795        | -38.5                    | 3.6        | -46.7                   | 2.6        | -27.4                  | 4.9        | 39.8                    | 2.6        | -4.2                   | 0.1        |
| 173        | ZINC000171342968        | -38.5                    | 3.4        | -48.4                   | 2.7        | -40.1                  | 3.9        | 54.5                    | 3.1        | -4.4                   | 0.1        |
| 174        | ZINC000006887927        | -38.2                    | 2.7        | -48.4                   | 2.6        | -23.5                  | 3.7        | 38.1                    | 2.7        | -4.4                   | 0.1        |
| 175        | ZINC000013278475        | -38.2                    | 4.3        | -48.6                   | 2.9        | -43.7                  | 10.1       | 58.3                    | 8.8        | -4.2                   | 0.1        |
| 176        | ZINC000018053795        | -38.2                    | 3.6        | -47.5                   | 2.3        | -23.2                  | 3.7        | 36.5                    | 3.0        | -4.0                   | 0.1        |

| #   | ZINC ID          | $\Delta G_{\text{bind}}$ | <i>std</i> | $\Delta E_{\text{vdW}}$ | <i>std</i> | $\Delta E_{\text{el}}$ | <i>std</i> | $\Delta G_{\text{pol}}$ | <i>std</i> | $\Delta G_{\text{np}}$ | <i>std</i> |
|-----|------------------|--------------------------|------------|-------------------------|------------|------------------------|------------|-------------------------|------------|------------------------|------------|
| 177 | ZINC000044908085 | -38.2                    | 3.4        | -51.1                   | 2.7        | -21.0                  | 3.4        | 37.9                    | 2.8        | -4.0                   | 0.1        |
| 178 | ZINC000022241454 | -38.1                    | 3.8        | -39.1                   | 2.9        | -39.2                  | 6.6        | 43.6                    | 5.3        | -3.4                   | 0.1        |
| 179 | ZINC000253407066 | -38.1                    | 3.1        | -46.7                   | 2.4        | -13.2                  | 3.4        | 26.0                    | 2.6        | -4.2                   | 0.1        |
| 180 | ZINC000057526426 | -38.1                    | 2.9        | -44.4                   | 2.2        | -28.2                  | 3.1        | 38.5                    | 2.8        | -4.0                   | 0.1        |
| 181 | ZINC000009318781 | -38.1                    | 3.9        | -46.3                   | 2.8        | -25.5                  | 6.6        | 37.5                    | 4.4        | -3.9                   | 0.1        |
| 182 | ZINC000040548686 | -38.0                    | 2.7        | -51.5                   | 2.2        | -22.0                  | 4.2        | 39.7                    | 2.8        | -4.2                   | 0.1        |
| 183 | ZINC000072235028 | -38.0                    | 2.8        | -52.8                   | 2.4        | -12.0                  | 4.3        | 31.2                    | 3.0        | -4.4                   | 0.1        |
| 184 | ZINC000096122792 | -38.0                    | 2.8        | -48.6                   | 2.6        | -9.0                   | 2.7        | 23.6                    | 2.8        | -3.9                   | 0.1        |
| 185 | ZINC000028790813 | -37.9                    | 3.7        | -51.7                   | 2.7        | -23.6                  | 5.6        | 41.5                    | 3.9        | -4.1                   | 0.1        |
| 186 | ZINC000239762559 | -37.8                    | 3.4        | -48.8                   | 2.5        | -20.7                  | 4.1        | 35.7                    | 3.2        | -4.0                   | 0.1        |
| 187 | ZINC000029134571 | -37.7                    | 2.6        | -52.1                   | 2.4        | -19.8                  | 3.2        | 38.5                    | 3.1        | -4.3                   | 0.1        |
| 188 | ZINC000089857747 | -37.7                    | 3.2        | -50.7                   | 4.5        | -7.1                   | 5.1        | 24.3                    | 6.6        | -4.1                   | 0.2        |
| 189 | ZINC000048249797 | -37.7                    | 3.1        | -50.8                   | 2.7        | -10.4                  | 5.2        | 27.8                    | 2.9        | -4.3                   | 0.1        |
| 190 | ZINC000002630701 | -37.7                    | 2.6        | -49.0                   | 2.0        | -7.6                   | 4.1        | 23.0                    | 3.7        | -4.0                   | 0.1        |
| 191 | ZINC000091487017 | -37.6                    | 2.6        | -49.3                   | 2.3        | -11.6                  | 3.0        | 27.6                    | 2.5        | -4.3                   | 0.1        |
| 192 | ZINC000021835963 | -37.6                    | 2.8        | -48.7                   | 2.2        | -25.8                  | 3.3        | 40.9                    | 2.2        | -4.0                   | 0.1        |
| 193 | ZINC000153353600 | -37.6                    | 4.2        | -46.2                   | 2.7        | -9.4                   | 3.9        | 22.0                    | 2.4        | -3.9                   | 0.1        |
| 194 | ZINC000019327176 | -37.6                    | 3.8        | -40.2                   | 3.0        | -26.9                  | 5.7        | 33.0                    | 3.6        | -3.6                   | 0.1        |
| 195 | ZINC000005303591 | -37.6                    | 2.9        | -44.2                   | 2.5        | -20.1                  | 3.9        | 30.6                    | 2.1        | -3.9                   | 0.1        |
| 196 | ZINC000245171655 | -37.5                    | 2.7        | -48.7                   | 2.3        | -10.2                  | 2.7        | 25.4                    | 2.0        | -4.0                   | 0.1        |
| 197 | ZINC000050857093 | -37.5                    | 4.3        | -48.7                   | 2.5        | -24.6                  | 3.8        | 40.1                    | 3.2        | -4.3                   | 0.1        |
| 198 | ZINC000004495846 | -37.5                    | 2.8        | -46.3                   | 2.7        | -25.8                  | 4.2        | 38.6                    | 4.0        | -4.0                   | 0.1        |
| 199 | ZINC000068269627 | -37.5                    | 2.8        | -50.4                   | 2.4        | -26.9                  | 4.4        | 44.0                    | 3.8        | -4.1                   | 0.1        |
| 200 | ZINC000074014922 | -37.5                    | 2.4        | -47.0                   | 2.1        | -10.1                  | 2.3        | 23.5                    | 2.4        | -4.0                   | 0.1        |
| 201 | ZINC000058099587 | -37.3                    | 3.1        | -46.8                   | 2.8        | -18.8                  | 3.4        | 32.1                    | 2.5        | -3.7                   | 0.1        |
| 202 | ZINC000091321614 | -37.3                    | 3.1        | -49.4                   | 2.4        | -18.1                  | 3.8        | 34.5                    | 3.7        | -4.2                   | 0.1        |
| 203 | ZINC000095447759 | -37.2                    | 3.5        | -46.9                   | 2.9        | -24.7                  | 5.4        | 38.4                    | 3.8        | -4.0                   | 0.1        |
| 204 | ZINC000072437791 | -37.1                    | 2.2        | -46.5                   | 2.2        | -14.0                  | 3.0        | 27.5                    | 2.1        | -4.1                   | 0.1        |
| 205 | ZINC000238831563 | -37.1                    | 4.0        | -47.8                   | 2.5        | -11.5                  | 4.4        | 26.4                    | 2.4        | -4.2                   | 0.1        |
| 206 | ZINC000584897275 | -37.0                    | 2.9        | -44.7                   | 2.8        | -36.2                  | 4.3        | 47.8                    | 3.2        | -4.0                   | 0.1        |
| 207 | ZINC000077353582 | -36.9                    | 3.9        | -48.6                   | 2.8        | -15.7                  | 3.0        | 31.2                    | 2.1        | -3.9                   | 0.1        |
| 208 | ZINC000004807849 | -36.9                    | 3.1        | -36.5                   | 3.5        | -47.7                  | 6.0        | 50.9                    | 3.7        | -3.7                   | 0.2        |
| 209 | ZINC000284798034 | -36.9                    | 3.4        | -50.9                   | 2.3        | -22.1                  | 4.5        | 40.3                    | 3.1        | -4.2                   | 0.1        |
| 210 | ZINC000062639858 | -36.8                    | 2.5        | -52.0                   | 2.2        | -3.7                   | 3.5        | 23.3                    | 3.2        | -4.4                   | 0.2        |
| 211 | ZINC000012142779 | -36.8                    | 4.7        | -50.2                   | 2.6        | -15.4                  | 9.7        | 33.2                    | 6.6        | -4.4                   | 0.1        |
| 212 | ZINC000192929211 | -36.7                    | 3.4        | -44.2                   | 2.7        | -50.4                  | 8.5        | 62.0                    | 6.9        | -4.0                   | 0.1        |
| 213 | ZINC000097105546 | -36.7                    | 2.8        | -44.7                   | 2.6        | -21.9                  | 3.7        | 33.7                    | 3.6        | -3.9                   | 0.1        |
| 214 | ZINC000136345745 | -36.7                    | 2.8        | -51.8                   | 2.4        | -18.5                  | 4.8        | 38.0                    | 4.4        | -4.3                   | 0.1        |
| 215 | ZINC000097050589 | -36.7                    | 3.3        | -48.8                   | 2.6        | -13.0                  | 4.7        | 29.0                    | 3.5        | -3.9                   | 0.1        |
| 216 | ZINC000040386098 | -36.6                    | 2.9        | -42.7                   | 2.5        | -14.7                  | 3.4        | 24.4                    | 2.7        | -3.6                   | 0.1        |
| 217 | ZINC000299793701 | -36.6                    | 2.9        | -42.4                   | 2.8        | -25.9                  | 5.0        | 35.5                    | 3.4        | -3.8                   | 0.1        |
| 218 | ZINC000119429896 | -36.5                    | 2.6        | -49.5                   | 2.2        | -11.7                  | 2.9        | 29.0                    | 2.4        | -4.4                   | 0.1        |
| 219 | ZINC000035671101 | -36.5                    | 2.2        | -46.7                   | 2.0        | -8.1                   | 1.6        | 21.8                    | 1.7        | -3.6                   | 0.1        |
| 220 | ZINC000018240833 | -36.5                    | 3.4        | -47.5                   | 2.8        | -36.3                  | 5.3        | 51.6                    | 3.3        | -4.3                   | 0.1        |
| 221 | ZINC000306138347 | -36.3                    | 2.3        | -49.7                   | 2.0        | -17.4                  | 3.2        | 34.8                    | 2.9        | -4.1                   | 0.1        |
| 222 | ZINC000061067795 | -36.3                    | 2.6        | -48.3                   | 2.2        | -15.0                  | 3.9        | 31.4                    | 2.8        | -4.3                   | 0.1        |

| #   | ZINC ID          | $\Delta G_{\text{bind}}$ | <i>std</i> | $\Delta E_{\text{vdW}}$ | <i>std</i> | $\Delta E_{\text{el}}$ | <i>std</i> | $\Delta G_{\text{pol}}$ | <i>std</i> | $\Delta G_{\text{np}}$ | <i>std</i> |
|-----|------------------|--------------------------|------------|-------------------------|------------|------------------------|------------|-------------------------|------------|------------------------|------------|
| 223 | ZINC000095469884 | -36.2                    | 2.9        | -40.0                   | 2.8        | -35.7                  | 3.7        | 42.9                    | 1.9        | -3.4                   | 0.1        |
| 224 | ZINC000004535480 | -36.1                    | 2.7        | -45.6                   | 2.2        | -15.5                  | 4.7        | 28.5                    | 4.2        | -3.5                   | 0.1        |
| 225 | ZINC000096837115 | -36.1                    | 6.1        | -45.6                   | 4.0        | -26.8                  | 7.8        | 40.3                    | 5.2        | -4.0                   | 0.2        |
| 226 | ZINC000008771448 | -36.0                    | 3.9        | -48.5                   | 3.0        | -22.3                  | 5.8        | 38.9                    | 4.9        | -4.1                   | 0.3        |
| 227 | ZINC000040385901 | -36.0                    | 3.2        | -41.1                   | 2.8        | -13.7                  | 2.9        | 22.3                    | 2.4        | -3.4                   | 0.1        |
| 228 | ZINC000008776545 | -35.8                    | 2.6        | -47.3                   | 2.4        | -15.6                  | 2.9        | 31.3                    | 2.2        | -4.1                   | 0.1        |
| 229 | ZINC000023764785 | -35.7                    | 3.3        | -45.9                   | 2.6        | -14.8                  | 4.5        | 29.0                    | 3.2        | -4.1                   | 0.1        |
| 230 | ZINC000003947438 | -35.7                    | 3.4        | -41.0                   | 2.4        | -48.7                  | 9.2        | 57.7                    | 7.8        | -3.7                   | 0.1        |
| 231 | ZINC000192753414 | -35.6                    | 3.6        | -46.9                   | 2.7        | -33.1                  | 4.6        | 48.2                    | 2.4        | -3.9                   | 0.1        |
| 232 | ZINC000095989182 | -35.6                    | 2.8        | -43.2                   | 2.2        | -19.0                  | 3.6        | 30.3                    | 2.6        | -3.8                   | 0.1        |
| 233 | ZINC000006669352 | -35.5                    | 2.7        | -47.6                   | 2.2        | -23.6                  | 5.5        | 40.1                    | 4.7        | -4.4                   | 0.1        |
| 234 | ZINC000253473237 | -35.5                    | 2.4        | -44.9                   | 2.2        | -8.2                   | 2.9        | 21.8                    | 1.7        | -4.1                   | 0.1        |
| 235 | ZINC000072807915 | -35.5                    | 2.7        | -50.6                   | 2.3        | -8.1                   | 3.6        | 27.4                    | 3.4        | -4.2                   | 0.1        |
| 236 | ZINC000016228943 | -35.5                    | 2.6        | -43.6                   | 2.6        | -26.4                  | 3.3        | 38.3                    | 2.4        | -3.7                   | 0.1        |
| 237 | ZINC000077522487 | -35.4                    | 2.6        | -48.6                   | 2.2        | -27.2                  | 5.2        | 44.4                    | 4.5        | -4.1                   | 0.1        |
| 238 | ZINC000177842371 | -35.3                    | 2.6        | -45.3                   | 2.0        | -26.9                  | 3.7        | 40.5                    | 3.0        | -3.7                   | 0.1        |
| 239 | ZINC000178511392 | -35.2                    | 2.8        | -40.2                   | 2.5        | -33.4                  | 4.1        | 42.1                    | 2.6        | -3.6                   | 0.1        |
| 240 | ZINC000005244779 | -35.1                    | 2.5        | -49.8                   | 2.4        | -9.1                   | 2.7        | 28.0                    | 2.5        | -4.2                   | 0.1        |
| 241 | ZINC000006782318 | -35.1                    | 2.6        | -47.7                   | 2.3        | -17.2                  | 2.7        | 33.7                    | 2.4        | -4.0                   | 0.1        |
| 242 | ZINC000042025678 | -35.1                    | 3.0        | -43.6                   | 4.1        | -13.2                  | 5.4        | 25.4                    | 2.3        | -3.6                   | 0.2        |
| 243 | ZINC000012239509 | -35.0                    | 3.7        | -50.5                   | 2.5        | -8.0                   | 5.0        | 27.7                    | 2.6        | -4.2                   | 0.1        |
| 244 | ZINC000057771728 | -34.9                    | 3.3        | -48.2                   | 2.5        | -23.3                  | 5.5        | 40.9                    | 3.6        | -4.3                   | 0.2        |
| 245 | ZINC000000079035 | -34.8                    | 3.6        | -47.2                   | 2.3        | -20.0                  | 5.4        | 36.4                    | 3.4        | -4.0                   | 0.1        |
| 246 | ZINC000075140034 | -34.7                    | 2.6        | -41.8                   | 2.4        | -19.7                  | 2.9        | 30.9                    | 2.3        | -4.0                   | 0.1        |
| 247 | ZINC000095951555 | -34.6                    | 2.8        | -42.9                   | 2.3        | -19.4                  | 3.3        | 31.4                    | 2.2        | -3.8                   | 0.1        |
| 248 | ZINC000065591272 | -34.4                    | 2.4        | -44.9                   | 2.2        | -10.8                  | 2.9        | 25.4                    | 2.1        | -4.2                   | 0.1        |
| 249 | ZINC000257257831 | -34.4                    | 3.2        | -45.8                   | 2.2        | -13.1                  | 4.8        | 28.4                    | 3.7        | -3.9                   | 0.1        |
| 250 | ZINC000091943530 | -34.4                    | 2.9        | -44.1                   | 2.7        | -17.5                  | 4.4        | 31.0                    | 2.9        | -3.8                   | 0.1        |
| 251 | ZINC000016543876 | -34.4                    | 3.4        | -46.0                   | 2.3        | -18.4                  | 3.8        | 34.1                    | 2.4        | -4.1                   | 0.1        |
| 252 | ZINC000030875068 | -34.3                    | 2.6        | -45.9                   | 2.2        | -11.0                  | 3.9        | 26.5                    | 2.7        | -3.9                   | 0.1        |
| 253 | ZINC000096038482 | -34.2                    | 3.7        | -39.5                   | 2.9        | -25.3                  | 6.7        | 34.3                    | 4.0        | -3.7                   | 0.1        |
| 254 | ZINC000040266307 | -34.2                    | 3.1        | -44.5                   | 2.5        | -22.5                  | 4.2        | 37.0                    | 2.6        | -4.2                   | 0.1        |
| 255 | ZINC000084563579 | -34.0                    | 3.5        | -45.4                   | 4.0        | -21.3                  | 15.9       | 36.6                    | 13.5       | -4.0                   | 0.1        |
| 256 | ZINC000253433605 | -34.0                    | 3.8        | -47.3                   | 2.5        | -14.9                  | 7.6        | 32.2                    | 5.8        | -4.1                   | 0.1        |
| 257 | ZINC000585093122 | -33.9                    | 2.5        | -45.2                   | 2.6        | -16.9                  | 4.4        | 32.1                    | 3.1        | -3.9                   | 0.1        |
| 258 | ZINC000019796838 | -33.9                    | 3.3        | -46.3                   | 2.1        | -10.9                  | 3.4        | 27.0                    | 2.8        | -3.8                   | 0.1        |
| 259 | ZINC000008609997 | -33.9                    | 3.3        | -50.6                   | 2.4        | -12.7                  | 3.4        | 33.3                    | 2.7        | -3.9                   | 0.1        |
| 260 | ZINC000257311417 | -33.7                    | 2.9        | -40.7                   | 2.2        | -22.2                  | 4.6        | 33.0                    | 3.5        | -3.8                   | 0.1        |
| 261 | ZINC000255187536 | -33.6                    | 2.8        | -42.3                   | 2.5        | -21.5                  | 3.7        | 34.1                    | 2.4        | -3.9                   | 0.1        |
| 262 | ZINC000237955843 | -33.5                    | 4.0        | -40.6                   | 2.6        | -64.6                  | 10.7       | 75.6                    | 9.4        | -3.9                   | 0.2        |
| 263 | ZINC000000326909 | -33.4                    | 2.7        | -42.9                   | 2.1        | -16.5                  | 3.4        | 29.3                    | 2.1        | -3.3                   | 0.1        |
| 264 | ZINC000034407910 | -33.4                    | 2.1        | -38.4                   | 2.1        | -16.2                  | 2.9        | 24.7                    | 2.0        | -3.4                   | 0.1        |
| 265 | ZINC000003313076 | -33.4                    | 2.9        | -41.7                   | 3.0        | -21.4                  | 4.5        | 33.6                    | 2.2        | -3.8                   | 0.1        |
| 266 | ZINC000001381807 | -33.2                    | 2.1        | -37.1                   | 2.1        | -15.1                  | 2.3        | 22.5                    | 1.8        | -3.5                   | 0.1        |
| 267 | ZINC000006117573 | -33.1                    | 2.5        | -42.2                   | 2.4        | -29.4                  | 2.9        | 42.3                    | 2.3        | -3.8                   | 0.1        |
| 268 | ZINC000057511709 | -33.0                    | 2.8        | -45.5                   | 2.0        | -21.3                  | 5.0        | 37.6                    | 4.6        | -3.8                   | 0.1        |

| #   | ZINC ID          | $\Delta G_{\text{bind}}$ | <i>std</i> | $\Delta E_{\text{vdW}}$ | <i>std</i> | $\Delta E_{\text{el}}$ | <i>std</i> | $\Delta G_{\text{pol}}$ | <i>std</i> | $\Delta G_{\text{np}}$ | <i>std</i> |
|-----|------------------|--------------------------|------------|-------------------------|------------|------------------------|------------|-------------------------|------------|------------------------|------------|
| 269 | ZINC000072432742 | -33.0                    | 2.9        | -49.1                   | 2.3        | -23.0                  | 9.9        | 43.4                    | 9.5        | -4.3                   | 0.1        |
| 270 | ZINC000018177963 | -33.0                    | 2.7        | -32.7                   | 3.1        | -55.0                  | 5.3        | 58.3                    | 3.2        | -3.6                   | 0.1        |
| 271 | ZINC000072234903 | -32.5                    | 3.0        | -44.1                   | 2.2        | -12.2                  | 3.9        | 27.9                    | 3.9        | -4.0                   | 0.1        |
| 272 | ZINC000001810957 | -32.5                    | 2.5        | -45.8                   | 2.6        | -17.6                  | 3.6        | 35.0                    | 2.9        | -4.1                   | 0.1        |
| 273 | ZINC000215185695 | -32.3                    | 2.4        | -47.4                   | 2.1        | -15.8                  | 2.1        | 35.3                    | 1.9        | -4.4                   | 0.1        |
| 274 | ZINC000047209496 | -32.2                    | 3.4        | -44.4                   | 2.4        | -12.9                  | 5.2        | 29.2                    | 6.0        | -4.0                   | 0.1        |
| 275 | ZINC000002390471 | -32.2                    | 2.3        | -43.9                   | 2.0        | -12.0                  | 2.3        | 27.6                    | 2.1        | -3.8                   | 0.1        |
| 276 | ZINC000268943077 | -32.1                    | 2.7        | -41.8                   | 2.6        | -25.1                  | 8.3        | 38.5                    | 8.3        | -3.7                   | 0.1        |
| 277 | ZINC000019973951 | -32.0                    | 4.5        | -40.3                   | 3.0        | -29.7                  | 6.5        | 41.6                    | 3.2        | -3.5                   | 0.2        |
| 278 | ZINC000002837442 | -31.8                    | 2.9        | -42.9                   | 2.8        | -16.2                  | 2.5        | 31.4                    | 1.7        | -4.0                   | 0.1        |
| 279 | ZINC000012407997 | -31.8                    | 3.3        | -48.0                   | 2.8        | -11.5                  | 5.7        | 32.0                    | 4.9        | -4.2                   | 0.2        |
| 280 | ZINC000012508838 | -31.7                    | 3.0        | -49.0                   | 2.3        | -24.7                  | 4.2        | 46.3                    | 3.3        | -4.3                   | 0.1        |
| 281 | ZINC000004806959 | -31.7                    | 2.8        | -39.4                   | 2.6        | -55.4                  | 9.5        | 67.1                    | 8.3        | -4.0                   | 0.1        |
| 282 | ZINC000575617533 | -31.6                    | 2.4        | -44.8                   | 2.3        | -10.6                  | 3.0        | 27.7                    | 3.2        | -3.9                   | 0.2        |
| 283 | ZINC000072277544 | -31.6                    | 3.8        | -45.7                   | 2.8        | -14.8                  | 5.4        | 32.9                    | 4.0        | -3.9                   | 0.1        |
| 284 | ZINC000237740654 | -31.6                    | 3.2        | -45.0                   | 2.8        | -28.0                  | 10.4       | 45.5                    | 10.2       | -4.0                   | 0.2        |
| 285 | ZINC000012122382 | -31.4                    | 2.8        | -42.6                   | 2.3        | -9.5                   | 4.8        | 24.4                    | 3.2        | -3.8                   | 0.2        |
| 286 | ZINC000001620500 | -31.1                    | 6.8        | -42.1                   | 2.8        | -51.7                  | 24.4       | 66.5                    | 18.4       | -3.8                   | 0.1        |
| 287 | ZINC000069740630 | -30.6                    | 4.8        | -38.0                   | 2.6        | -20.8                  | 4.5        | 31.8                    | 2.5        | -3.7                   | 0.2        |
| 288 | ZINC000004722011 | -30.6                    | 2.6        | -44.0                   | 2.2        | -7.3                   | 2.7        | 24.4                    | 2.4        | -3.6                   | 0.1        |
| 289 | ZINC000005088834 | -30.3                    | 3.1        | -42.9                   | 3.6        | -8.5                   | 2.5        | 25.0                    | 2.0        | -3.8                   | 0.1        |
| 290 | ZINC000027755553 | -30.2                    | 2.7        | -46.7                   | 2.1        | -15.9                  | 3.0        | 36.2                    | 2.4        | -3.8                   | 0.1        |
| 291 | ZINC000170016387 | -29.8                    | 2.7        | -42.6                   | 2.8        | -20.5                  | 5.3        | 37.3                    | 4.4        | -4.0                   | 0.1        |
| 292 | ZINC000012557330 | -29.6                    | 2.7        | -43.0                   | 2.5        | -10.2                  | 4.3        | 27.1                    | 3.4        | -3.6                   | 0.2        |
| 293 | ZINC000004732939 | -29.5                    | 3.0        | -43.8                   | 2.2        | -13.6                  | 3.0        | 31.7                    | 2.8        | -3.8                   | 0.1        |
| 294 | ZINC000006556210 | -29.3                    | 2.5        | -41.4                   | 2.6        | -10.2                  | 2.5        | 25.9                    | 3.2        | -3.6                   | 0.1        |
| 295 | ZINC000003852421 | -29.3                    | 2.1        | -44.3                   | 2.1        | -12.6                  | 2.6        | 31.2                    | 2.2        | -3.7                   | 0.1        |
| 296 | ZINC000017888288 | -29.3                    | 3.1        | -44.1                   | 2.3        | -16.9                  | 4.4        | 35.3                    | 3.0        | -3.6                   | 0.1        |
| 297 | ZINC000096198984 | -28.3                    | 3.3        | -45.9                   | 2.9        | -8.7                   | 3.7        | 30.4                    | 3.7        | -4.1                   | 0.2        |
| 298 | ZINC000085879141 | -28.3                    | 2.5        | -41.7                   | 2.4        | -10.0                  | 5.3        | 27.0                    | 3.8        | -3.5                   | 0.1        |
| 299 | ZINC000006918427 | -28.1                    | 3.6        | -45.0                   | 2.5        | -13.1                  | 4.0        | 33.9                    | 2.8        | -3.9                   | 0.2        |
| 300 | ZINC000000353960 | -27.6                    | 4.1        | -35.6                   | 2.7        | -63.0                  | 13.2       | 74.4                    | 10.6       | -3.4                   | 0.2        |
| 301 | ZINC000000201272 | -26.5                    | 3.2        | -46.5                   | 2.2        | -6.7                   | 5.2        | 30.6                    | 4.1        | -4.0                   | 0.1        |
| 302 | ZINC000237699092 | -26.3                    | 3.7        | -40.8                   | 3.4        | -32.2                  | 15.3       | 50.2                    | 14.6       | -3.6                   | 0.2        |
| 303 | ZINC000069895275 | -24.7                    | 3.8        | -37.0                   | 2.2        | -35.4                  | 13.7       | 51.2                    | 11.2       | -3.5                   | 0.1        |
| 304 | ZINC000006576136 | -24.3                    | 3.1        | -34.5                   | 2.6        | -32.9                  | 10.1       | 46.4                    | 7.8        | -3.2                   | 0.1        |
| 305 | ZINC000008848147 | -21.5                    | 3.5        | -38.7                   | 3.2        | -26.7                  | 14.3       | 47.4                    | 11.6       | -3.5                   | 0.1        |



**Table S7.** Summary of docking and free energy results obtained for the selected 33 compounds, indicated by compound ID (**Figure S2**), ZINC ID(s) and MolPort ID. The first ZINC ID (\*) in multiple sets indicate the enantiomer or diastereomer identified through the virtual screening procedure, whereas the compounds obtained from MolPort were mixtures of the corresponding stereoisomers. The free energy results from MM/PBSA and MM/GBSA calculations are reported for 2 parameter sets employed in the PBSA and GBSA methods. Ranking in boldface (#) indicates highly ranked compound in each parameter set.

| ID | ZINC ID                                                       | MolPort ID              | VINA score<br>(kcal/mol) |              | MM/PB(GB)SA<br>$\Delta G_{\text{bind}}$ (kcal/mol) |                              |                       |                       |
|----|---------------------------------------------------------------|-------------------------|--------------------------|--------------|----------------------------------------------------|------------------------------|-----------------------|-----------------------|
|    |                                                               |                         | <i>IRAP</i>              | <i>ERAP1</i> | <i>PB-1</i><br>(rank)                              | <i>PB-4</i><br>(rank)        | <i>GB-1</i><br>(rank) | <i>GB-5</i><br>(rank) |
| 1  | 000091486133*<br>000091486131                                 | MolPort-027-<br>863-667 | -10.2                    | -7.5         | -1.3<br>(#105)                                     | -30.3<br>(#59)               | -51.0<br><b>(#13)</b> | -50.6<br><b>(#17)</b> |
| 2  | 000244816835                                                  | MolPort-039-<br>039-060 | -11.0                    | -9.2         | -8.1<br><b>(#17)</b>                               | -31.5<br>(#41)               | -43.5<br>(#127)       | -42.6<br>(#95)        |
| 3  | 000015078577*<br>000015078575                                 | MolPort-005-<br>163-536 | -9.9                     | -7.1         | -10.8<br><b>(#6)</b>                               | -32.6<br><b>(#29)</b>        | -49.0<br><b>(#27)</b> | -48.7<br><b>(#30)</b> |
| 4  | 000091270543*<br>000091270544                                 | MolPort-027-<br>857-260 | -9.9                     | -7.4         | -7.8<br><b>(#20)</b>                               | -36.9<br><b>(#3)</b>         | -53.3<br><b>(#5)</b>  | -53.9<br><b>(#7)</b>  |
| 5  | 000223692657*<br>000223692703                                 | MolPort-038-<br>425-524 | -11.0                    | -8.9         | -7.5<br><b>(#22)</b>                               | -33.5<br><b>(#17)</b>        | -46.0<br>(#61)        | -42.2<br>(#99)        |
| 6  | 000035869910*<br>000035869911<br>000169680566<br>000169680567 | MolPort-006-<br>484-933 | -9.9                     | -7.4         | -14.1<br><b>(#2)</b>                               | -38.7<br><b>(#1)</b>         | -55.5<br><b>(#2)</b>  | -59.9<br><b>(#2)</b>  |
| 7  | 000008595944                                                  | MolPort-007-<br>773-311 | -10.6                    | -8.1         | -5.0<br>(#42)                                      | -29.1<br>(#78)               | -46.7<br>(#50)        | -52.4<br><b>(#10)</b> |
| 8  | 000095410774*<br>000095410775<br>000095410776<br>000095410777 | MolPort-027-<br>906-298 | -10.2                    | -7.4         | -7.4<br><b>(#23)</b>                               | -32.5<br><b>(#31)</b>        | -48.2<br>(#38)        | -47.5<br>(#40)        |
| 9  | 000057563200                                                  | MolPort-035-<br>834-132 | -11.1                    | -10.0        | -4.5<br>(#51)                                      | -35.4<br><b>(#9)</b>         | -50.0<br><b>(#18)</b> | -46.8<br>(#48)        |
| 10 | 000069562405*<br>000069562406<br>000069562399<br>000069562402 | MolPort-020-<br>152-989 | -10.4                    | -7.9         | -9.8<br><b>(#9)</b>                                | <b>-33.7</b><br><b>(#14)</b> | -46.8<br>(#48)        | -45.0<br>(#64)        |
| 11 | 000051467674*<br>000051467673                                 | MolPort-019-<br>674-325 | -11.1                    | -8.0         | -8.0<br><b>(#19)</b>                               | -32.6<br><b>(#30)</b>        | -48.6<br><b>(#31)</b> | -44.9<br>(#67)        |
| 12 | 000069778215                                                  | MolPort-020-<br>162-189 | -10.9                    | -9.5         | -5.0<br>(#43)                                      | -27.2<br>(#119)              | -53.5<br><b>(#4)</b>  | -56.4<br><b>(#3)</b>  |
| 13 | 000095415912*<br>000095415911<br>000095415910<br>000095415909 | MolPort-028-<br>771-825 | -11.1                    | -8.5         | -6.5<br><b>(#27)</b>                               | -35.4<br><b>(#8)</b>         | -52.6<br><b>(#9)</b>  | -48.2<br>(#35)        |
| 14 | 000044919578*<br>000044919582                                 | MolPort-009-<br>543-745 | -10.9                    | -8.5         | -8.0<br><b>(#18)</b>                               | -29.5<br>(#72)               | -43.2<br>(#135)       | -39.4<br>(#150)       |

| ID | ZINC ID                                                       | MolPort ID          | VINA score<br>(kcal/mol) |              | MM/PB(GB)SA<br>$\Delta G_{\text{bind}}$ (kcal/mol) |                       |                       |                       |
|----|---------------------------------------------------------------|---------------------|--------------------------|--------------|----------------------------------------------------|-----------------------|-----------------------|-----------------------|
|    |                                                               |                     | <i>IRAP</i>              | <i>ERAP1</i> | <i>PB-1</i><br>(rank)                              | <i>PB-4</i><br>(rank) | <i>GB-1</i><br>(rank) | <i>GB-5</i><br>(rank) |
| 15 | 000023642159*<br>000023642157                                 | MolPort-004-188-947 | -10.1                    | -7.1         | 0.3<br>(#142)                                      | -26.4<br>(#137)       | -50.5<br>(#16)        | -56.4<br>(#4)         |
| 16 | 000084598177*<br>000084598174                                 | MolPort-027-679-372 | -10.9                    | -9.5         | -10.5<br>(#8)                                      | -36.2<br>(#6)         | -49.0<br>(#26)        | -45.9<br>(#58)        |
| 17 | 000005360885*<br>000005360891                                 | MolPort-005-610-771 | -10.9                    | -9.6         | -9.7<br>(#10)                                      | -36.0<br>(#7)         | -49.0<br>(#24)        | -42.6<br>(#91)        |
| 18 | 000043550595                                                  | MolPort-009-519-757 | -10.9                    | -8.7         | -5.1<br>(#41)                                      | -33.1<br>(#22)        | -45.9<br>(#64)        | -41.1<br>(#118)       |
| 19 | 000240454699*<br>000240454698                                 | MolPort-039-259-003 | -10.9                    | -8.6         | -7.0<br>(#25)                                      | -32.2<br>(#32)        | -44.3<br>(#103)       | -39.0<br>(#156)       |
| 20 | 000022191233                                                  | MolPort-009-450-517 | -10.9                    | -9.2         | -9.2<br>(#12)                                      | -35.1<br>(#10)        | -53.1<br>(#6)         | -49.4<br>(#24)        |
| 21 | 000003463362*<br>000003463364<br>000003463365                 | MolPort-004-164-037 | -10.8                    | -8.1         | -7.3<br>(#24)                                      | -37.7<br>(#2)         | -52.6<br>(#8)         | -51.5<br>(#15)        |
| 22 | 000084578820*<br>000084578821<br>000084578815<br>000084578818 | MolPort-027-704-758 | -10.5                    | -8.0         | -13.9<br>(#3)                                      | -36.3<br>(#4)         | -51.1<br>(#12)        | -48.8<br>(#28)        |
| 23 | 000071915224*<br>000071915223                                 | MolPort-020-057-841 | -10.9                    | -9.2         | -5.8<br>(#33)                                      | -32.9<br>(#25)        | -46.2<br>(#60)        | -42.8<br>(#87)        |
| 24 | 000025032259*<br>000025032263                                 | MolPort-009-027-892 | -10.7                    | -8.1         | -3.0<br>(#75)                                      | -31.0<br>(#46)        | -49.1<br>(#22)        | -45.7<br>(#63)        |
| 25 | 000069737923*<br>000069737924                                 | MolPort-020-053-566 | -9.8                     | -7.1         | -7.7<br>(#21)                                      | -33.2<br>(#20)        | -46.2<br>(#58)        | -42.1<br>(#101)       |
| 26 | 000010256259*<br>000010256257                                 | MolPort-003-173-337 | -11.0                    | -9.7         | -15.7<br>(#1)                                      | -34.3<br>(#13)        | -53.6<br>(#3)         | -48.6<br>(#31)        |
| 27 | 000000333210*<br>000000333211                                 | MolPort-003-801-767 | -10.9                    | -9.0         | -8.3<br>(#16)                                      | -33.6<br>(#15)        | -49.8<br>(#19)        | -46.9<br>(#45)        |
| 28 | 000004998502*<br>000004998501                                 | MolPort-000-832-181 | -10.9                    | -9.3         | -3.9<br>(#68)                                      | -30.8<br>(#53)        | -52.8<br>(#7)         | -47.0<br>(#44)        |
| 29 | 000008913866*<br>000008913865                                 | MolPort-000-828-576 | -10.9                    | -8.3         | -4.7<br>(#50)                                      | -29.3<br>(#75)        | -49.1<br>(#23)        | -50.6<br>(#19)        |
| 30 | 000018148904*<br>000100900762                                 | MolPort-000-694-123 | -10.2                    | -7.7         | -9.5<br>(#11)                                      | -33.4<br>(#18)        | -48.2<br>(#37)        | -42.1<br>(#102)       |
| 31 | 000079491038                                                  | MolPort-023-297-297 | -10.4                    | -7.8         | -10.5<br>(#7)                                      | -34.4<br>(#12)        | -48.5<br>(#32)        | -43.5<br>(#77)        |
| 32 | 000004511530                                                  | MolPort-000-407-697 | -10.1                    | -7.6         | -8.6<br>(#14)                                      | -28.5<br>(#92)        | -45.2<br>(#83)        | -40.3<br>(#133)       |
| 33 | 000002216953                                                  | MolPort-001-905-390 | -10.3                    | -7.7         | -4.4<br>(#53)                                      | -31.0<br>(#50)        | -49.0<br>(#25)        | -46.7<br>(#49)        |

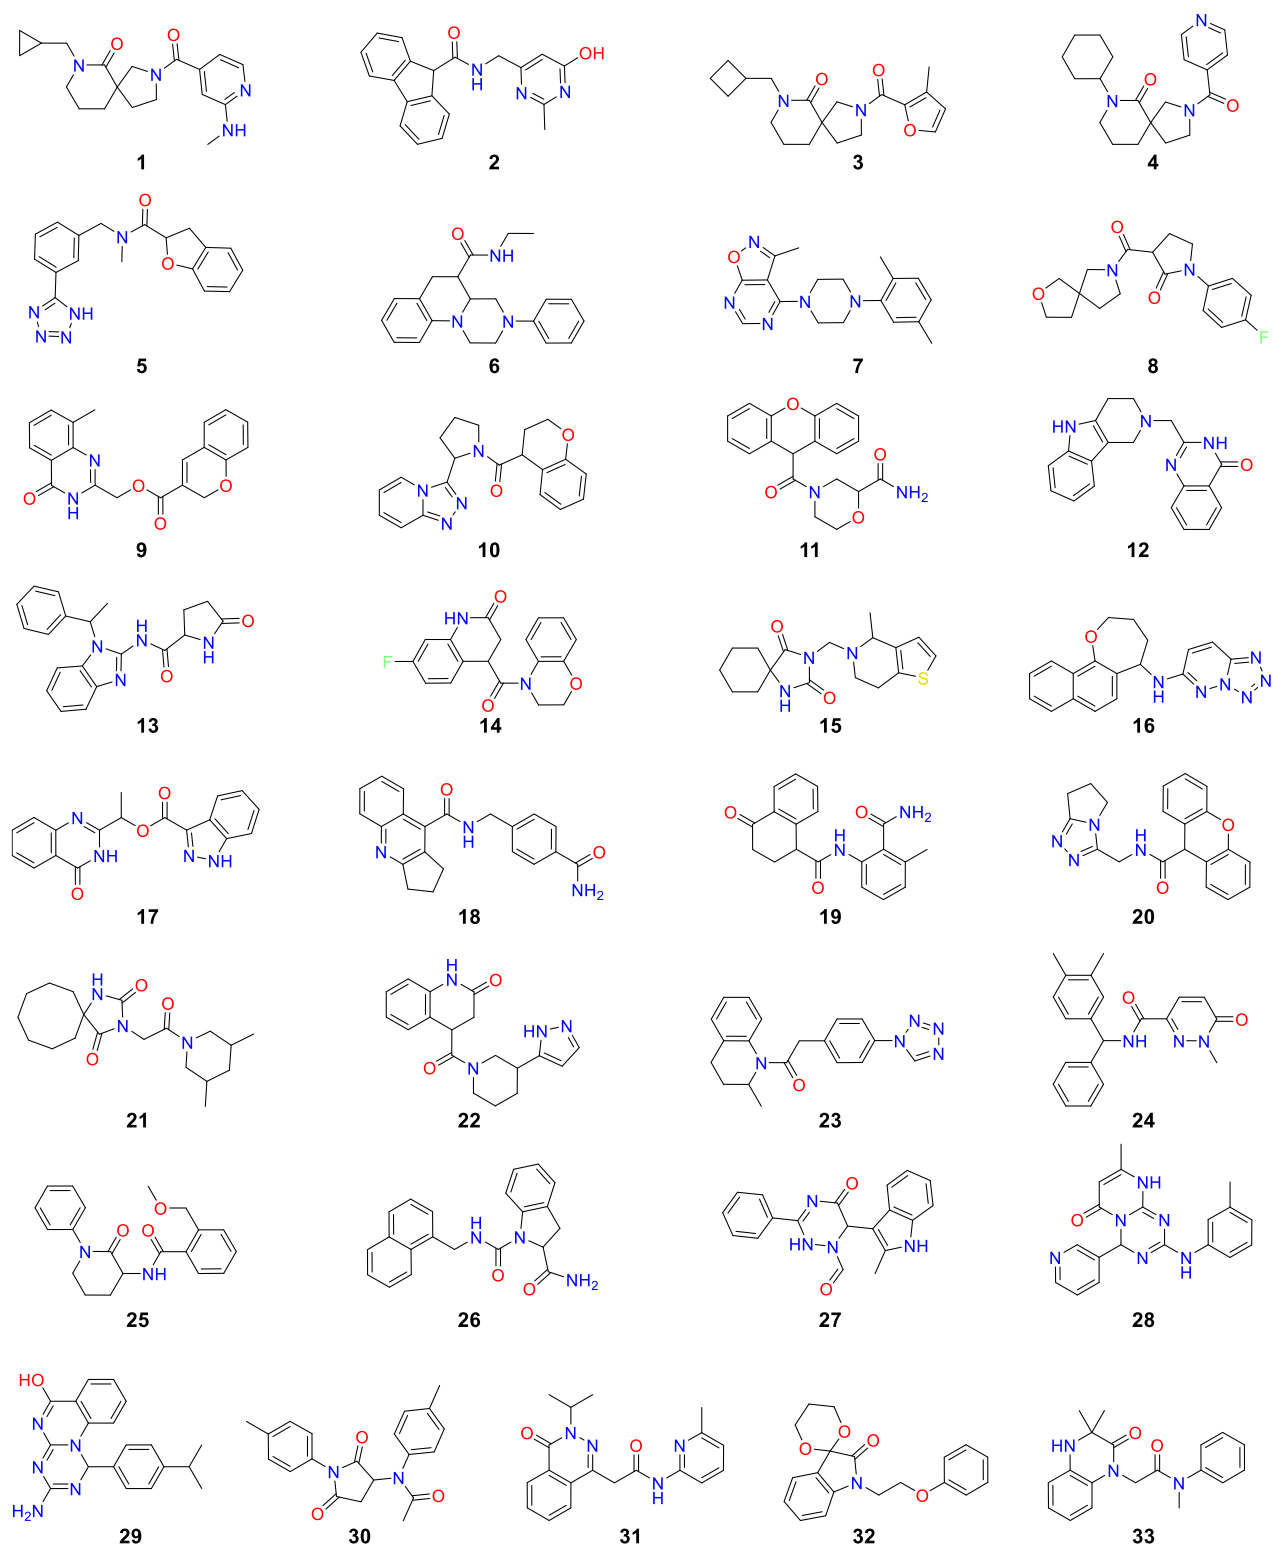

**Figure S2.** Structures of the 33 compounds selected for evaluation as inhibitors of IRAP. Where applicable, stereochemistry is not defined to indicate that mixture of enantiomers or diastereomers was obtained from MolPort and was used without further purification.

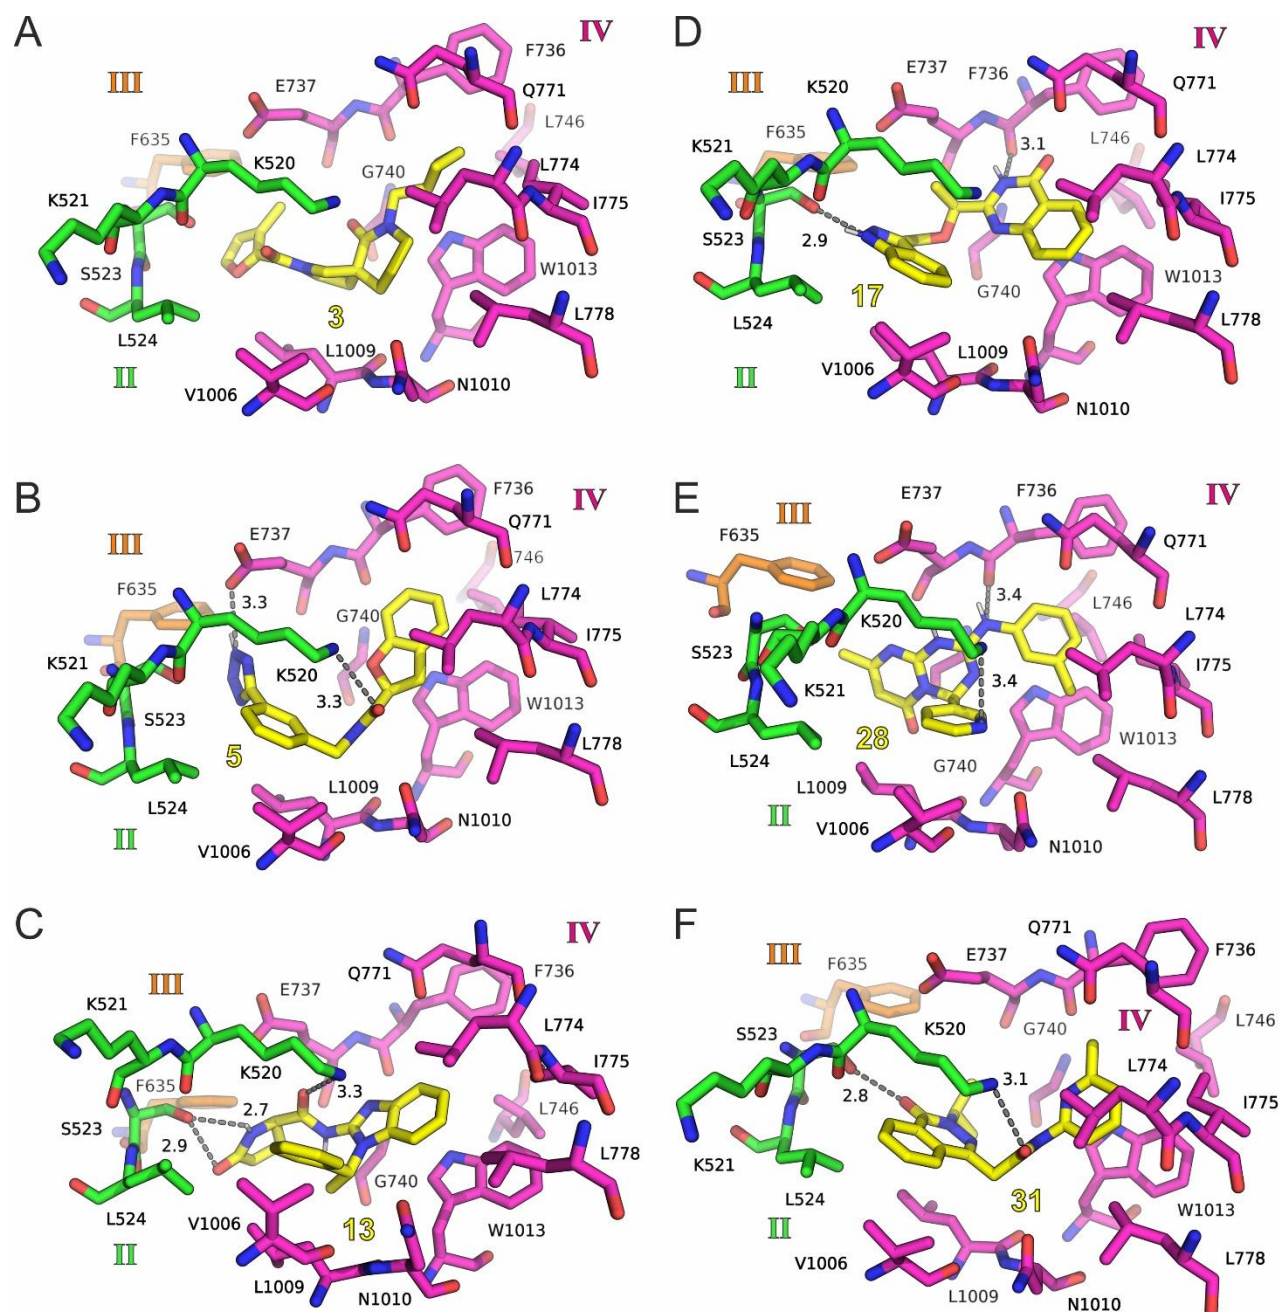

**Figure S3.** Bound conformations of the active compounds **3**, **5**, **13**, **17**, **28** and **31** inside the targeted pocket of IRAP. Surrounding residues are color-coded according to IRAP domain (II, III or IV) as indicated. Potential hydrogen-bonding interactions are shown with dashed lines and the corresponding heavy-atom distances (Å).

**Figure S4.** Computed physiochemical descriptors and radar plots as obtained using SwissADME server for compounds 1–33 (including ZINC ID). The colored zone in the radar plots indicates favorable physiochemical space for oral bioavailability, using the following descriptors: Lipophilicity ( $-0.7 < \text{xLogP}_3 < 5.0$ ); Size ( $150 < \text{MW} < 500$ , g/mol); Polarity ( $20 < \text{TPSA} < 130$ , Å<sup>2</sup>); Insolubility ( $0 < \text{LogS}_{\text{ESOL}} < 6$ ); Insaturation ( $0.25 < \text{Fsp}_3 < 1$ ); Flexibility ( $0 < \text{rotatable torsions} < 9$ ). Detailed information about the descriptors can be found in reference [1] given below.

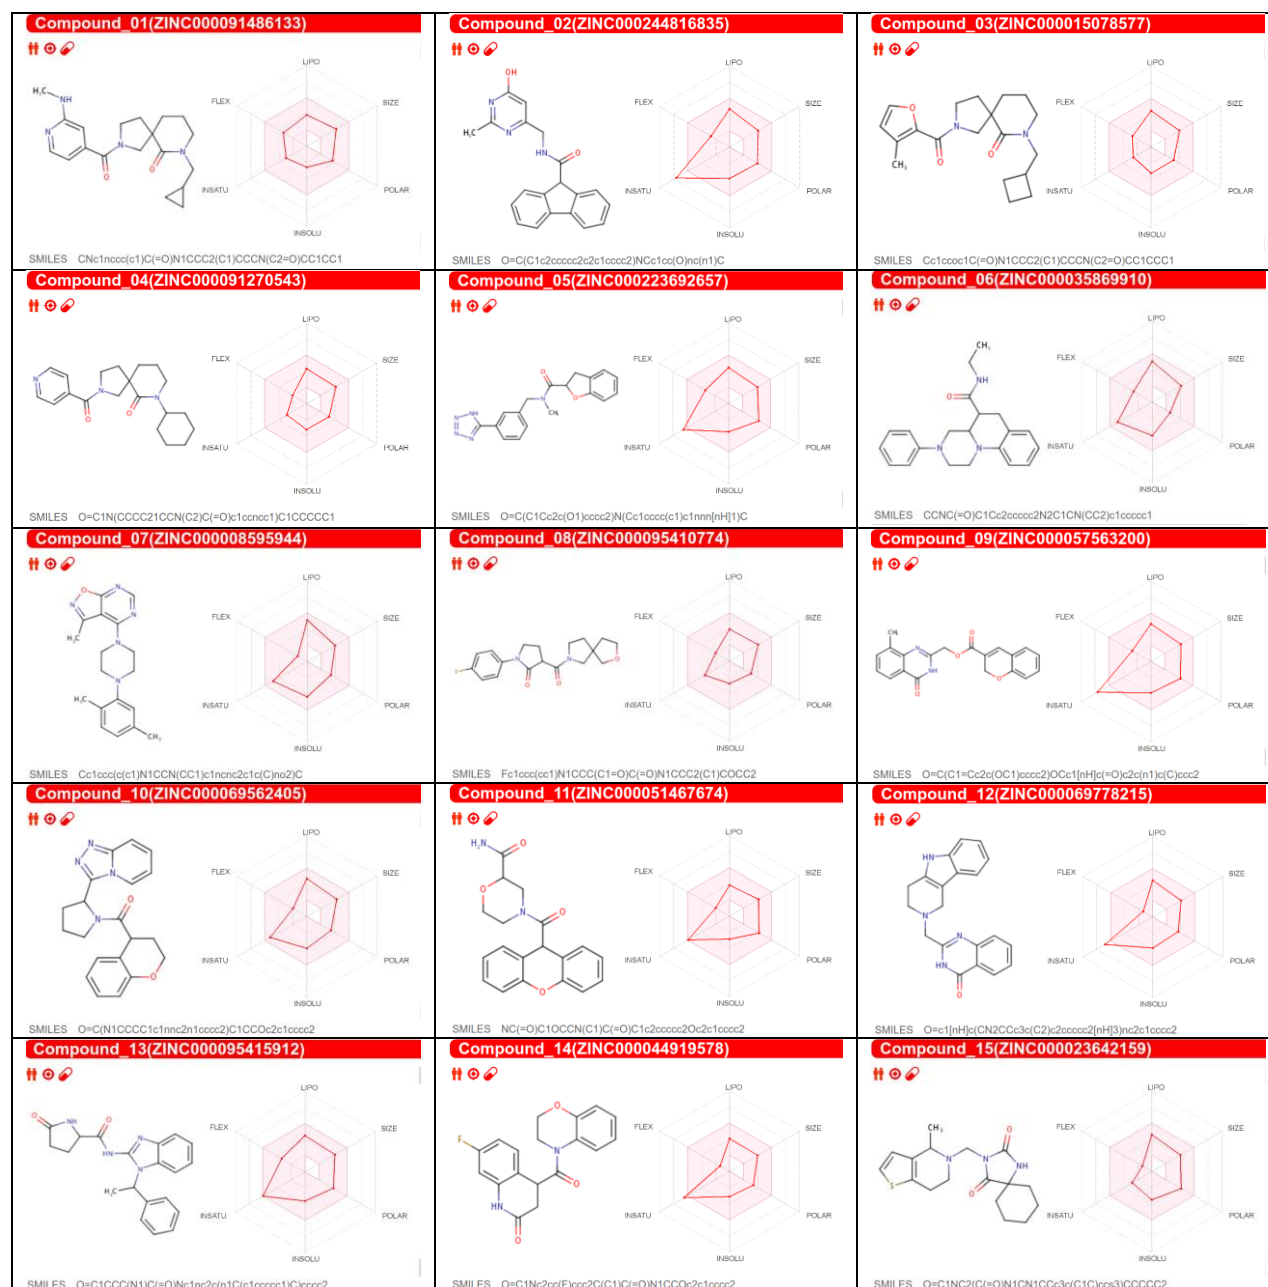

<sup>1</sup> Daina, A., Michielin, O. & Zoete, V. SwissADME: a free web tool to evaluate pharmacokinetics, drug-likeness and medicinal chemistry friendliness of small molecules. Sci Rep 7, 42717 (2017).





| ID                       | 1                | 2                | 3                | 4                | 5                | 6                  | 7                  |
|--------------------------|------------------|------------------|------------------|------------------|------------------|--------------------|--------------------|
| ZINC ID                  | ZINC000091486133 | ZINC000244816835 | ZINC000015078577 | ZINC000091270543 | ZINC000223692657 | ZINC000035869910   | ZINC000008595944   |
| Formula                  | C19H26N4O2       | C20H17N3O2       | C19H26N2O3       | C20H27N3O2       | C18H17N5O2       | C21H25N3O          | C18H21N5O          |
| MW                       | 342.4            | 331.4            | 330.4            | 341.5            | 335.4            | 335.4              | 323.4              |
| #Heavy atoms             | 25               | 25               | 24               | 25               | 25               | 25                 | 24                 |
| #Aromatic heavy atoms    | 6                | 18               | 5                | 6                | 17               | 12                 | 15                 |
| Fraction Csp3            | 0.63             | 0.15             | 0.68             | 0.65             | 0.22             | 0.38               | 0.39               |
| #Rotatable bonds         | 5                | 4                | 4                | 3                | 5                | 4                  | 2                  |
| #H-bond acceptors        | 3                | 4                | 3                | 3                | 5                | 1                  | 4                  |
| #H-bond donors           | 1                | 2                | 0                | 0                | 1                | 1                  | 0                  |
| MR                       | 103.83           | 94.57            | 98.77            | 104.14           | 90.96            | 108.02             | 100.99             |
| TPSA                     | 65.54            | 75.11            | 53.76            | 53.51            | 84               | 35.58              | 58.29              |
| iLOGP                    | 2.85             | 2.38             | 3.45             | 2.96             | 2.34             | 2.71               | 3.2                |
| XLOGP3                   | 1.28             | 2.72             | 2.34             | 2.03             | 2.27             | 3.39               | 3.5                |
| ESOL Class               | Soluble          | Soluble          | Soluble          | Soluble          | Soluble          | Moderately soluble | Moderately soluble |
| GI absorption            | High             | High             | High             | High             | High             | High               | High               |
| BBB permeant             | No               | Yes              | Yes              | Yes              | No               | Yes                | Yes                |
| Pgp substrate            | Yes              | Yes              | Yes              | Yes              | No               | Yes                | No                 |
| CYP1A2 inhibitor         | No               | No               | No               | No               | No               | No                 | Yes                |
| CYP2C19 inhibitor        | No               | Yes              | No               | No               | Yes              | Yes                | No                 |
| CYP2C9 inhibitor         | No               | Yes              | Yes              | Yes              | Yes              | No                 | Yes                |
| CYP2D6 inhibitor         | Yes              | Yes              | Yes              | Yes              | No               | Yes                | Yes                |
| CYP3A4 inhibitor         | No               | Yes              | Yes              | Yes              | Yes              | Yes                | Yes                |
| log Kp (cm/s)            | -7.48            | -6.39            | -6.65            | -6.94            | -6.73            | -5.94              | -5.79              |
| Lipinski #violations     | 0                | 0                | 0                | 0                | 0                | 0                  | 0                  |
| Ghose #violations        | 0                | 0                | 0                | 0                | 0                | 0                  | 0                  |
| Veber #violations        | 0                | 0                | 0                | 0                | 0                | 0                  | 0                  |
| Egan #violations         | 0                | 0                | 0                | 0                | 0                | 0                  | 0                  |
| Muegge #violations       | 0                | 0                | 0                | 0                | 0                | 0                  | 0                  |
| Bioavailability Score    | 0.55             | 0.55             | 0.55             | 0.55             | 0.56             | 0.55               | 0.55               |
| PAINS #alerts            | 0                | 0                | 0                | 0                | 0                | 0                  | 0                  |
| Brenk #alerts            | 0                | 0                | 0                | 0                | 0                | 0                  | 0                  |
| Leadlikeness #violations | 0                | 0                | 0                | 0                | 0                | 0                  | 0                  |
| Synthetic Accessibility  | 3.69             | 3.22             | 3.97             | 3.43             | 3.13             | 3.43               | 3.23               |

| ID                       | 8                | 9                | 10               | 11               | 12               | 13               | 14               |
|--------------------------|------------------|------------------|------------------|------------------|------------------|------------------|------------------|
| ZINC ID                  | ZINC000095410774 | ZINC000057563200 | ZINC000069562405 | ZINC000051467674 | ZINC000069778215 | ZINC000095415912 | ZINC000044919578 |
| Formula                  | C18H21FN2O3      | C20H16N2O4       | C20H20N4O2       | C19H18N2O4       | C20H18N4O        | C20H20N4O2       | C18H15FN2O3      |
| MW                       | 332.4            | 348.4            | 348.4            | 338.4            | 330.4            | 348.4            | 326.3            |
| #Heavy atoms             | 24               | 26               | 26               | 25               | 25               | 26               | 24               |
| #Aromatic heavy atoms    | 6                | 16               | 15               | 12               | 19               | 15               | 12               |
| Fraction Csp3            | 0.56             | 0.15             | 0.35             | 0.26             | 0.2              | 0.25             | 0.22             |
| #Rotatable bonds         | 3                | 4                | 3                | 3                | 2                | 5                | 2                |
| #H-bond acceptors        | 4                | 5                | 4                | 4                | 3                | 3                | 4                |
| #H-bond donors           | 0                | 1                | 0                | 1                | 2                | 2                | 1                |
| MR                       | 93.31            | 97.18            | 100.56           | 93.7             | 102.95           | 103.83           | 92.55            |
| TPSA                     | 49.85            | 81.28            | 59.73            | 81.86            | 64.78            | 76.02            | 58.64            |
| iLOGP                    | 2.75             | 3.07             | 2.96             | 2.19             | 2.15             | 1.58             | 2.42             |
| XLOGP3                   | 1.41             | 2.69             | 2.76             | 1.23             | 2.45             | 2.39             | 1.64             |
| ESOL Class               | Soluble          |
| GI absorption            | High             |
| BBB permeant             | Yes              | No               | Yes              | No               | Yes              | Yes              | Yes              |
| Pgp substrate            | Yes              | No               | No               | Yes              | Yes              | Yes              | Yes              |
| CYP1A2 inhibitor         | No               | Yes              | No               | No               | Yes              | No               | No               |
| CYP2C19 inhibitor        | No               | Yes              | Yes              | No               | No               | Yes              | Yes              |
| CYP2C9 inhibitor         | No               | Yes              | Yes              | No               | No               | No               | No               |
| CYP2D6 inhibitor         | Yes              | No               | Yes              | Yes              | Yes              | Yes              | Yes              |
| CYP3A4 inhibitor         | Yes              | Yes              | Yes              | No               | Yes              | Yes              | Yes              |
| log Kp (cm/s)            | -7.33            | -6.52            | -6.47            | -7.49            | -6.58            | -6.73            | -7.13            |
| Lipinski #violations     | 0                | 0                | 0                | 0                | 0                | 0                | 0                |
| Ghose #violations        | 0                | 0                | 0                | 0                | 0                | 0                | 0                |
| Veber #violations        | 0                | 0                | 0                | 0                | 0                | 0                | 0                |
| Egan #violations         | 0                | 0                | 0                | 0                | 0                | 0                | 0                |
| Muegge #violations       | 0                | 0                | 0                | 0                | 0                | 0                | 0                |
| Bioavailability Score    | 0.55             | 0.55             | 0.55             | 0.55             | 0.55             | 0.55             | 0.55             |
| PAINS #alerts            | 0                | 0                | 0                | 0                | 1                | 0                | 0                |
| Brenk #alerts            | 1                | 0                | 0                | 0                | 0                | 0                | 0                |
| Leadlikeness #violations | 0                | 0                | 0                | 0                | 0                | 0                | 0                |
| Synthetic Accessibility  | 3.64             | 3.31             | 3.77             | 3.7              | 2.67             | 3.32             | 3.16             |



| ID                       | 15               | 16                 | 17               | 18               | 19               | 20               | 21               |
|--------------------------|------------------|--------------------|------------------|------------------|------------------|------------------|------------------|
| ZINC ID                  | ZINC000023642159 | ZINC000084598177   | ZINC000005360885 | ZINC000043550595 | ZINC000240454699 | ZINC000022191233 | ZINC000003463362 |
| Formula                  | C17H23N3O2S      | C18H16N6O          | C18H14N4O3       | C21H19N3O2       | C19H18N2O3       | C20H18N4O2       | C19H31N3O3       |
| MW                       | 333.5            | 332.4              | 334.3            | 345.4            | 322.4            | 346.4            | 349.5            |
| #Heavy atoms             | 23               | 25                 | 25               | 26               | 24               | 26               | 25               |
| #Aromatic heavy atoms    | 5                | 19                 | 19               | 16               | 12               | 17               | 0                |
| Fraction Csp3            | 0.65             | 0.22               | 0.11             | 0.19             | 0.21             | 0.25             | 0.84             |
| #Rotatable bonds         | 2                | 2                  | 4                | 5                | 4                | 4                | 3                |
| #H-bond acceptors        | 3                | 5                  | 5                | 3                | 3                | 4                | 3                |
| #H-bond donors           | 1                | 1                  | 2                | 2                | 2                | 1                | 1                |
| MR                       | 101.95           | 93.87              | 92.59            | 99.95            | 91.19            | 95.57            | 108.47           |
| TPSA                     | 80.89            | 77.23              | 100.73           | 85.08            | 89.26            | 69.04            | 69.72            |
| iLOGP                    | 2.97             | 2.77               | 1.59             | 2.34             | 1.78             | 2.62             | 3.37             |
| XLOGP3                   | 2.52             | 3.43               | 2.64             | 2.52             | 2.36             | 1.83             | 3.07             |
| ESOL Class               | Soluble          | Moderately soluble | Soluble          | Soluble          | Soluble          | Soluble          | Soluble          |
| GI absorption            | High             | High               | High             | High             | High             | High             | High             |
| BBB permeant             | No               | Yes                | No               | No               | No               | Yes              | Yes              |
| Pgp substrate            | Yes              | No                 | No               | Yes              | Yes              | Yes              | Yes              |
| CYP1A2 inhibitor         | No               | Yes                | No               | Yes              | No               | Yes              | No               |
| CYP2C19 inhibitor        | Yes              | Yes                | Yes              | No               | No               | Yes              | No               |
| CYP2C9 inhibitor         | Yes              | No                 | No               | Yes              | No               | No               | No               |
| CYP2D6 inhibitor         | Yes              | No                 | No               | Yes              | No               | Yes              | No               |
| CYP3A4 inhibitor         | Yes              | No                 | No               | Yes              | Yes              | Yes              | No               |
| log Kp (cm/s)            | -6.54            | -5.89              | -6.47            | -6.62            | -6.59            | -7.11            | -6.25            |
| Lipinski #violations     | 0                | 0                  | 0                | 0                | 0                | 0                | 0                |
| Ghose #violations        | 0                | 0                  | 0                | 0                | 0                | 0                | 0                |
| Veber #violations        | 0                | 0                  | 0                | 0                | 0                | 0                | 0                |
| Egan #violations         | 0                | 0                  | 0                | 0                | 0                | 0                | 0                |
| Muegge #violations       | 0                | 0                  | 0                | 0                | 0                | 0                | 0                |
| Bioavailability Score    | 0.55             | 0.55               | 0.55             | 0.55             | 0.55             | 0.55             | 0.55             |
| PAINS #alerts            | 0                | 0                  | 0                | 0                | 0                | 0                | 0                |
| Brenk #alerts            | 1                | 0                  | 0                | 0                | 0                | 0                | 1                |
| Leadlikeness #violations | 0                | 0                  | 0                | 0                | 0                | 0                | 0                |
| Synthetic Accessibility  | 4.17             | 3.59               | 3.16             | 2.61             | 3.05             | 3.65             | 4.19             |

| ID                       | 22               | 23                 | 24                 | 25               | 26               | 27               |
|--------------------------|------------------|--------------------|--------------------|------------------|------------------|------------------|
| ZINC ID                  | ZINC000084578820 | ZINC000071915224   | ZINC000025032259   | ZINC000069737923 | ZINC000010256259 | ZINC000000333210 |
| Formula                  | C18H20N4O2       | C19H19N5O          | C21H21N3O2         | C20H22N2O3       | C21H19N3O2       | C19H16N4O2       |
| MW                       | 324.4            | 333.4              | 347.4              | 338.4            | 345.4            | 332.4            |
| #Heavy atoms             | 24               | 25                 | 26                 | 25               | 26               | 25               |
| #Aromatic heavy atoms    | 11               | 17                 | 18                 | 12               | 16               | 15               |
| Fraction Csp3            | 0.39             | 0.26               | 0.19               | 0.3              | 0.14             | 0.11             |
| #Rotatable bonds         | 3                | 4                  | 5                  | 6                | 5                | 3                |
| #H-bond acceptors        | 3                | 4                  | 3                  | 3                | 2                | 3                |
| #H-bond donors           | 2                | 0                  | 1                  | 1                | 2                | 2                |
| MR                       | 96.91            | 98.26              | 101.66             | 99.47            | 104.34           | 106.35           |
| TPSA                     | 78.09            | 63.91              | 63.99              | 58.64            | 75.43            | 77.56            |
| iLOGP                    | 1.77             | 2.94               | 3.02               | 2.87             | 2.34             | 1.81             |
| XLOGP3                   | 0.8              | 3                  | 3.09               | 2.46             | 2.87             | 2.79             |
| ESOL Class               | Soluble          | Moderately soluble | Moderately soluble | Soluble          | Soluble          | Soluble          |
| GI absorption            | High             | High               | High               | High             | High             | High             |
| BBB permeant             | No               | Yes                | Yes                | Yes              | Yes              | No               |
| Pgp substrate            | Yes              | No                 | No                 | Yes              | Yes              | No               |
| CYP1A2 inhibitor         | No               | No                 | No                 | No               | No               | No               |
| CYP2C19 inhibitor        | No               | Yes                | Yes                | Yes              | Yes              | Yes              |
| CYP2C9 inhibitor         | No               | Yes                | Yes                | Yes              | Yes              | Yes              |
| CYP2D6 inhibitor         | Yes              | No                 | No                 | Yes              | Yes              | No               |
| CYP3A4 inhibitor         | No               | No                 | Yes                | Yes              | Yes              | No               |
| log Kp (cm/s)            | -7.71            | -6.2               | -6.23              | -6.62            | -6.37            | -6.35            |
| Lipinski #violations     | 0                | 0                  | 0                  | 0                | 0                | 0                |
| Ghose #violations        | 0                | 0                  | 0                  | 0                | 0                | 0                |
| Veber #violations        | 0                | 0                  | 0                  | 0                | 0                | 0                |
| Egan #violations         | 0                | 0                  | 0                  | 0                | 0                | 0                |
| Muegge #violations       | 0                | 0                  | 0                  | 0                | 0                | 0                |
| Bioavailability Score    | 0.55             | 0.55               | 0.55               | 0.55             | 0.55             | 0.55             |
| PAINS #alerts            | 0                | 0                  | 0                  | 0                | 0                | 1                |
| Brenk #alerts            | 0                | 0                  | 0                  | 0                | 0                | 1                |
| Leadlikeness #violations | 0                | 0                  | 0                  | 0                | 0                | 0                |
| Synthetic Accessibility  | 3.4              | 3                  | 3.13               | 2.78             | 3.12             | 3.79             |

| ID                       | 28               | 29                 | 30               | 31               | 32               | 33               |
|--------------------------|------------------|--------------------|------------------|------------------|------------------|------------------|
| ZINC ID                  | ZINC000004998502 | ZINC000008913866   | ZINC000018148904 | ZINC000079491038 | ZINC000004511530 | ZINC000002216953 |
| Formula                  | C19H18N6O        | C19H19N5O          | C20H20N2O3       | C19H20N4O2       | C19H19NO4        | C19H21N3O2       |
| MW                       | 346.4            | 333.4              | 336.4            | 336.4            | 325.4            | 323.4            |
| #Heavy atoms             | 26               | 25                 | 25               | 25               | 24               | 24               |
| #Aromatic heavy atoms    | 18               | 16                 | 12               | 16               | 12               | 12               |
| Fraction Csp3            | 0.16             | 0.21               | 0.25             | 0.26             | 0.32             | 0.26             |
| #Rotatable bonds         | 3                | 2                  | 4                | 5                | 4                | 4                |
| #H-bond acceptors        | 4                | 4                  | 3                | 4                | 4                | 2                |
| #H-bond donors           | 2                | 2                  | 0                | 1                | 0                | 1                |
| MR                       | 107.01           | 104.44             | 100.15           | 98.44            | 91.82            | 102.3            |
| TPSA                     | 87.43            | 88.79              | 57.69            | 76.88            | 48               | 52.65            |
| iLOGP                    | 2.82             | 2.72               | 2.95             | 2.91             | 3.47             | 3.06             |
| XLOGP3                   | 1.6              | 2.84               | 2.62             | 2.67             | 2.51             | 2.75             |
| ESOL Class               | Soluble          | Moderately soluble | Soluble          | Soluble          | Soluble          | Soluble          |
| GI absorption            | High             | High               | High             | High             | High             | High             |
| BBB permeant             | No               | No                 | Yes              | Yes              | Yes              | Yes              |
| Pgp substrate            | No               | No                 | No               | No               | Yes              | No               |
| CYP1A2 inhibitor         | No               | No                 | No               | No               | Yes              | Yes              |
| CYP2C19 inhibitor        | Yes              | No                 | Yes              | Yes              | No               | Yes              |
| CYP2C9 inhibitor         | No               | Yes                | Yes              | Yes              | Yes              | Yes              |
| CYP2D6 inhibitor         | No               | No                 | No               | No               | Yes              | Yes              |
| CYP3A4 inhibitor         | Yes              | No                 | Yes              | No               | Yes              | Yes              |
| log Kp (cm/s)            | -7.28            | -6.32              | -6.49            | -6.46            | -6.5             | -6.32            |
| Lipinski #violations     | 0                | 0                  | 0                | 0                | 0                | 0                |
| Ghose #violations        | 0                | 0                  | 0                | 0                | 0                | 0                |
| Veber #violations        | 0                | 0                  | 0                | 0                | 0                | 0                |
| Egan #violations         | 0                | 0                  | 0                | 0                | 0                | 0                |
| Muegge #violations       | 0                | 0                  | 0                | 0                | 0                | 0                |
| Bioavailability Score    | 0.55             | 0.55               | 0.55             | 0.55             | 0.55             | 0.55             |
| PAINS #alerts            | 0                | 0                  | 0                | 0                | 0                | 0                |
| Brenk #alerts            | 0                | 0                  | 1                | 0                | 0                | 0                |
| Leadlikeness #violations | 0                | 0                  | 0                | 0                | 0                | 0                |
| Synthetic Accessibility  | 4.34             | 4.15               | 2.75             | 2.81             | 3.21             | 2.55             |

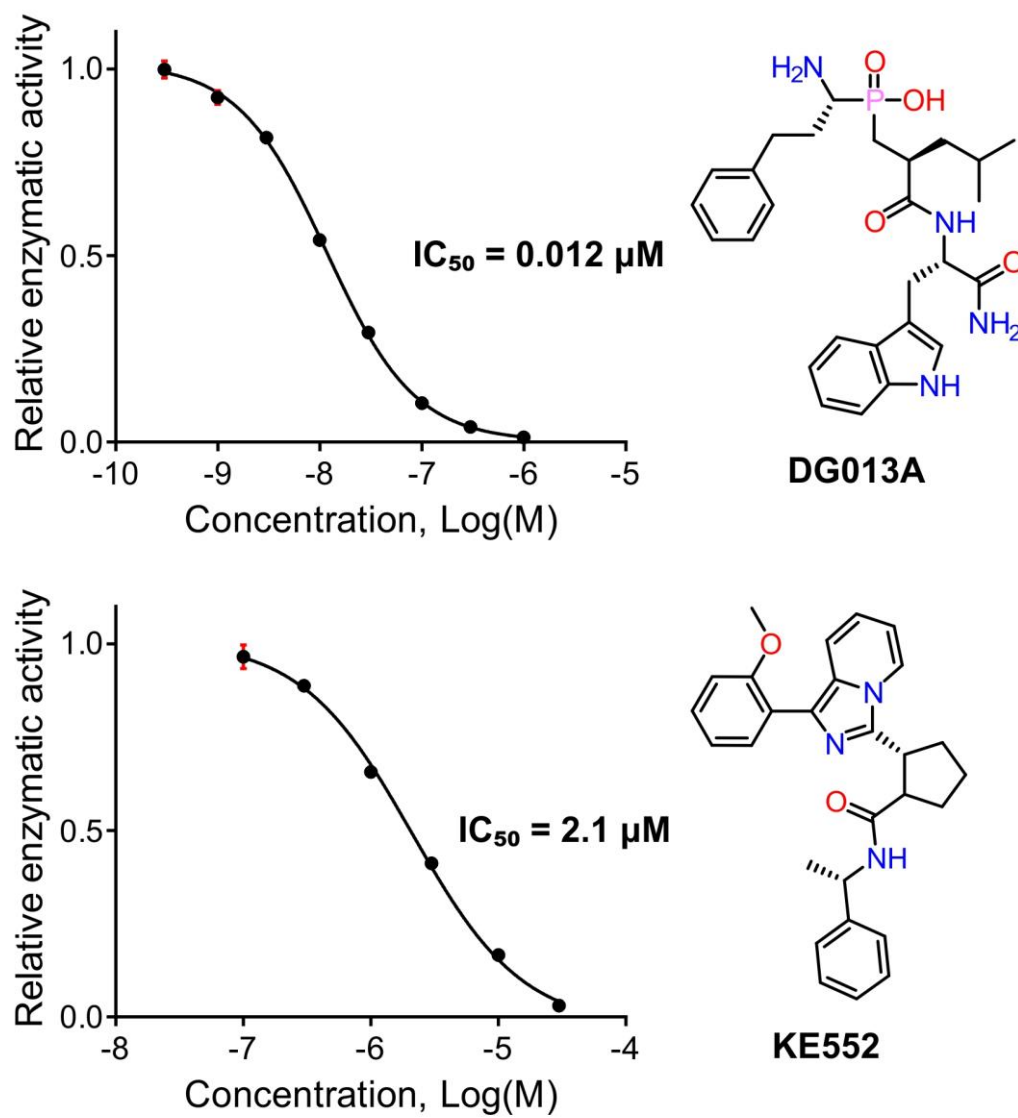

**Figure S5.** Validation of the effect of the known inhibitors **DG013A** and **KE552** on hydrolysis of the small fluorogenic substrate Leu-AMC by IRAP. Error bars indicate standard deviation and are shown only if they are significantly larger than the size of data points.

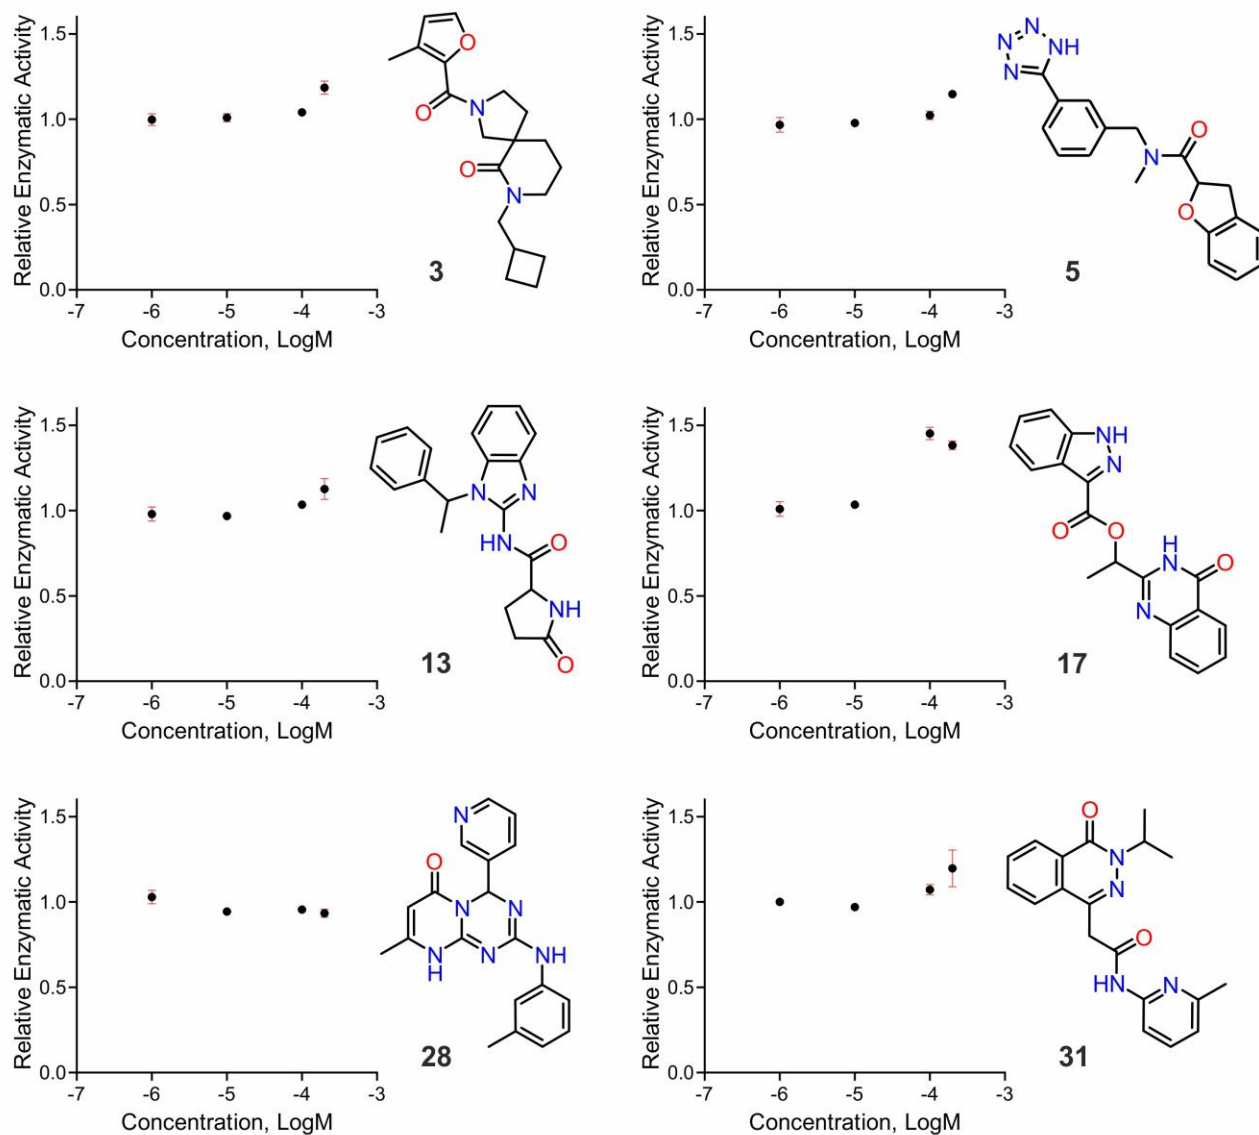

**Figure S6.** Effect of the hit compounds (**3**, **5**, **13**, **17**, **28** and **31**) on hydrolysis of the small fluorogenic substrate Leu-AMC by the homologous ER aminopeptidase ERAP1. Error bars indicate standard deviation and are shown only if they are significantly larger than the size of data points.

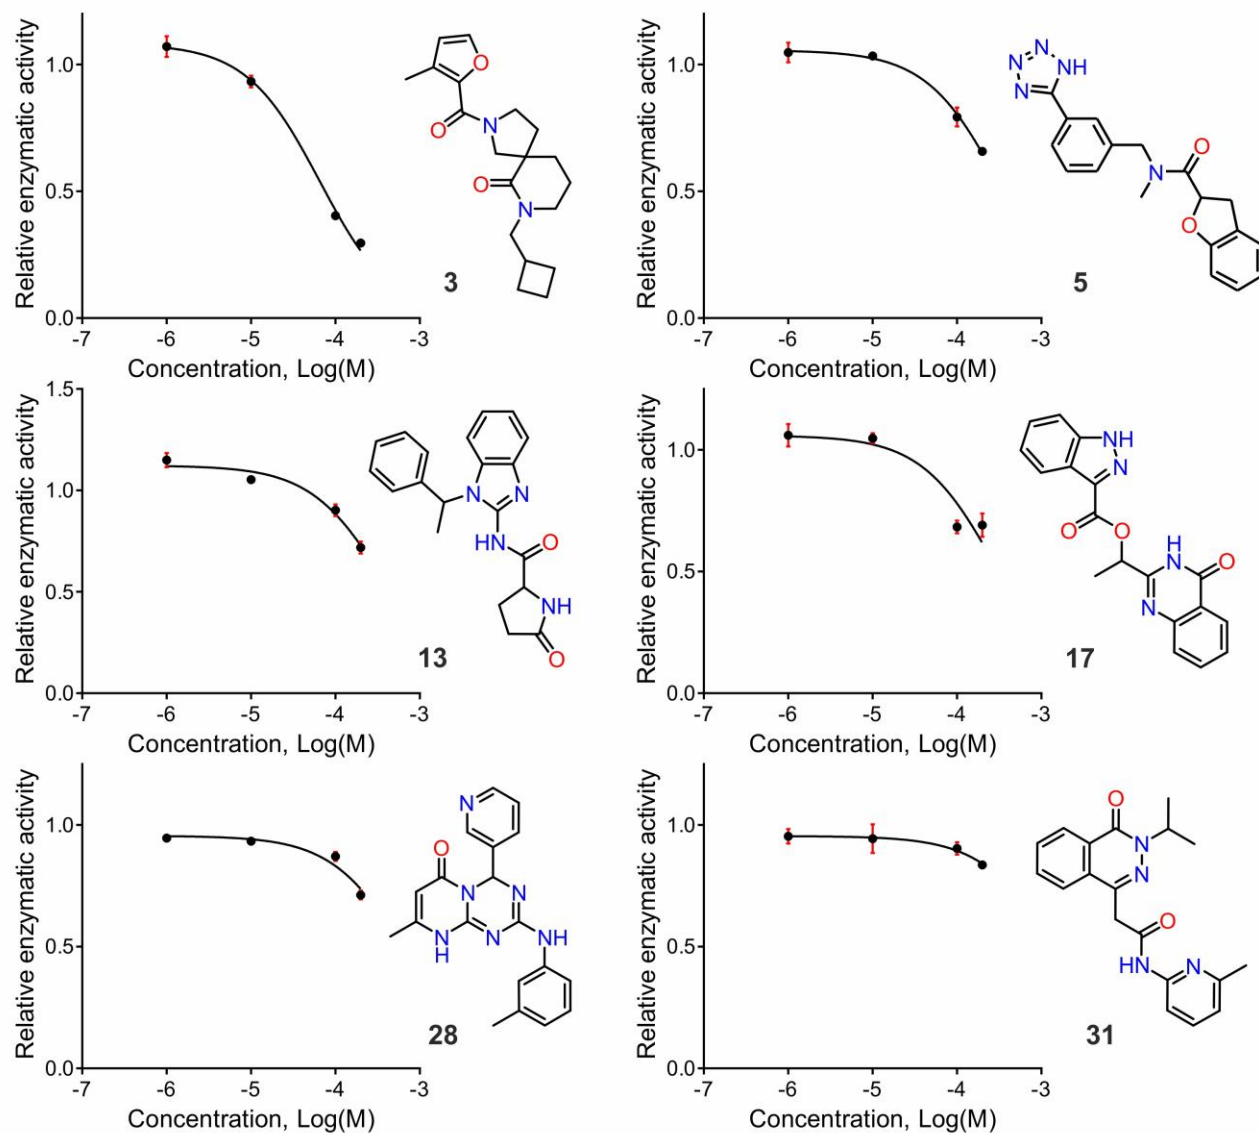

**Figure S7.** Effect of the hit compounds (**3**, **5**, **13**, **17**, **28** and **31**) on hydrolysis of the small fluorogenic substrate Arg-AMC by the homologous ER aminopeptidase ERAP2. Error bars indicate standard deviation and are shown only if they are significantly larger than the size of data points.

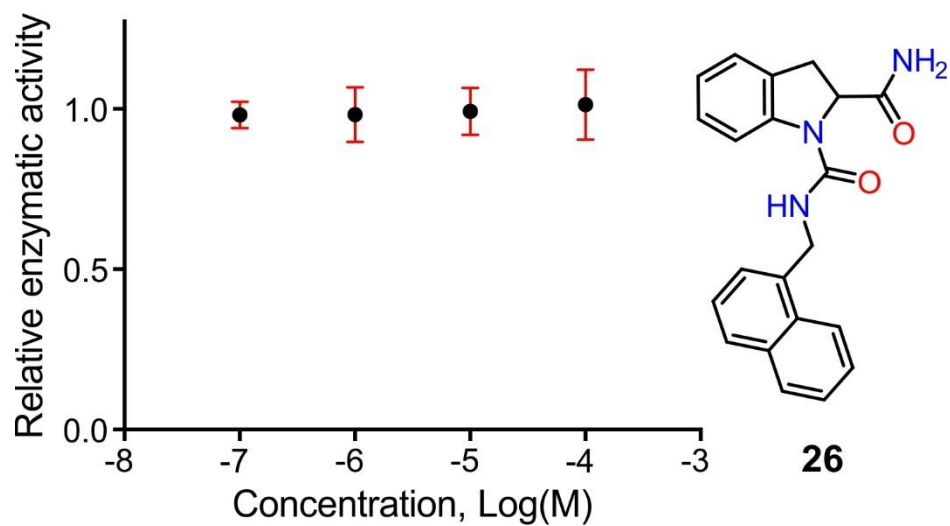

**Figure S8.** The effect of **26** on hydrolysis of the small fluorogenic substrate Leu-AMC, here at a concentration of 5  $\mu$ M, by IRAP. Error bars indicate standard deviation.
